# Supplementary material for: Quantum circuit learning as a potential algorithm to predict experimental chemical properties
Source: Royal Society of Chemistry journal article supplement (doi:10.1039/d2dd00090c), 2022-12-02
Supplement: d2dd00090c1.pdf [file d2dd00090c1.pdf]

# Supplementary Information

## Quantum circuit learning as a potential algorithm to predict experimental chemical properties

Kan Hatakeyama-Sato,\* Yasuhiko Igarashi,  
Takahiro Kashikawa, Koichi Kimura, Kenichi Oyaizu\*



|  |                                                 |                                                                                                   |                                                                                                                   |
|--|-------------------------------------------------|---------------------------------------------------------------------------------------------------|-------------------------------------------------------------------------------------------------------------------|
|  | $R_x(x_1) \otimes R_x(x_2)$                     | $(R_y(\theta) \otimes I_2) \cdot CNOT$                                                            | $\frac{\cos(-2\theta + 2x_1 + 2x_2)}{4} + \frac{\cos(2\theta - 2x_1 - 2x_2)}{4}$                                  |
|  | $(R_y(x_1)R_x(x_1)) \otimes (R_y(x_2)R_x(x_2))$ | $CNOT(2,1)$                                                                                       | $(2\sin^2(x_1) - 1)^2(2\sin^2(x_2) - 1)^2$                                                                        |
|  | $(R_y(x_1)R_x(x_1)) \otimes (R_y(x_2)R_x(x_2))$ | $(R_y(\theta) \otimes I_2) \cdot CNOT$                                                            | $(1 - \cos^2(2x_2))^2 \cos^2(2\theta) + \frac{\cos(2\theta - 2x_2)}{2} + \frac{\cos^2(2\theta + 4x_1 + 2x_2)}{4}$ |
|  | $(R_y(x_1)R_x(x_1)) \otimes (R_y(x_2)R_x(x_2))$ | $CNOT(2,1) \cdot (R_y(\theta_1) \otimes I_2) \cdot (R_y(\theta_2) \otimes I_2)$                   | Eq S1                                                                                                             |
|  | $(R_y(x_1)R_x(x_1)) \otimes (R_y(x_2)R_x(x_2))$ | $(R_x(\theta_3) \otimes I_2) \cdot (R_y(\theta_2) \otimes I_2) \cdot (R_x(\theta_1) \otimes I_2)$ | Eq S2                                                                                                             |
|  | $R_x(x_1) \otimes R_x(x_2) \otimes R_x(x_3)$    | $(R_y(\theta) \otimes I_2 \otimes I_2) \cdot CNOT(3,1) \cdot CNOT(2,3) \cdot CNOT(1,2)$           | Eq S3                                                                                                             |

|  |                                                                                                                                               |                                                                                                  |       |
|--|-----------------------------------------------------------------------------------------------------------------------------------------------|--------------------------------------------------------------------------------------------------|-------|
|  | $\left( R_y(x_1)R_x(x_1) \right. \\ \left. \otimes (R_y(x_2)R_x(x_2)) \right. \\ \left. \otimes (R_y(x_3)R_x(x_3)) \right. \\ \left. \right)$ | $(R_y(\theta) \otimes I_2 \otimes I_2) \\ \cdot CNOT(3,1) \\ \cdot CNOT(2,3) \\ \cdot CNOT(1,2)$ | Eq S4 |
|--|-----------------------------------------------------------------------------------------------------------------------------------------------|--------------------------------------------------------------------------------------------------|-------|

Eq S1

$$\begin{aligned}
& (1 - \cos(2x_1))^2 \cos(2\theta_2) - \frac{(1 - \cos(2x_2))^2 \cos(-2\theta_1 + 2\theta_2 + 4x_1)}{8} + \frac{(1 - \cos(2x_2))^2 \cos(2\theta_1 - 2\theta_2 + 4x_1)}{8} - \frac{(1 - \cos(2x_2))^2 \cos(2\theta_1 + 2\theta_2 - 4x_1)}{8} + \frac{(1 - \cos(2x_2))^2 \cos(2\theta_1 + 2\theta_2 + 4x_1)}{8} \\
& + \frac{\sin(-2\theta_1 + 2\theta_2 + 4x_2)}{8} + \frac{\sin(2\theta_1 - 2\theta_2 + 4x_2)}{8} + \frac{\sin(2\theta_1 + 2\theta_2 - 4x_2)}{8} - \frac{\sin(2\theta_1 + 2\theta_2 + 4x_2)}{8} - \frac{\sin(-2\theta_1 + 2\theta_2 + 2x_1 + 2x_2)}{8} - \frac{\sin(2\theta_1 - 2\theta_2 - 2x_1 + 2x_2)}{8} - \frac{\sin(2\theta_1 - 2\theta_2 + 2x_1 - 2x_2)}{8} \\
& + \frac{\sin(2\theta_1 - 2\theta_2 + 2x_1 + 2x_2)}{8} - \frac{\sin(2\theta_1 + 2\theta_2 - 2x_1 - 2x_2)}{8} + \frac{\sin(2\theta_1 + 2\theta_2 - 2x_1 + 2x_2)}{8} + \frac{\sin(2\theta_1 + 2\theta_2 + 2x_1 - 2x_2)}{8} - \frac{\sin(2\theta_1 + 2\theta_2 + 2x_1 + 2x_2)}{8} - \frac{3 \cos(2\theta_2)}{2} + \frac{\cos(2\theta_1 - 2\theta_2)}{4} + \frac{\cos(2\theta_1 + 2\theta_2)}{4} \\
& - \frac{\cos(2\theta_2 - 4x_1)}{4} + \cos(2\theta_2 - 2x_1) + \cos(2\theta_2 + 2x_1) - \frac{\cos(2\theta_2 + 4x_1)}{4} + \frac{\cos(-2\theta_1 + 2\theta_2 + 4x_1)}{4} + \frac{\cos(2\theta_1 + 2\theta_2 - 4x_1)}{4} - \frac{\cos(-2\theta_1 + 2\theta_2 + 4x_1 + 2x_2)}{8} - \frac{\cos(2\theta_1 - 2\theta_2 - 4x_1 + 2x_2)}{8} \\
& + \frac{\cos(2\theta_1 - 2\theta_2 + 4x_1 - 2x_2)}{8} + \frac{\cos(2\theta_1 - 2\theta_2 + 4x_1 + 2x_2)}{8} - \frac{\cos(2\theta_1 + 2\theta_2 - 4x_1 - 2x_2)}{8} - \frac{\cos(2\theta_1 + 2\theta_2 - 4x_1 + 2x_2)}{8} + \frac{\cos(2\theta_1 + 2\theta_2 + 4x_1 - 2x_2)}{8} + \frac{\cos(2\theta_1 + 2\theta_2 + 4x_1 + 2x_2)}{8}
\end{aligned}$$

Eq S2

$$\begin{aligned}
& \frac{(1 - \cos(-2\theta_1 + 2\theta_2 + 2\theta_3))(\cos(4x_2) + 1)}{32} - \frac{(1 - \cos(2\theta_1 - 2\theta_2 + 2\theta_3))(\cos(4x_2) + 1)}{32} - \frac{(1 - \cos(2\theta_1 + 2\theta_2 - 2\theta_3))(\cos(4x_2) + 1)}{32} - \frac{(1 - \cos(2\theta_1 + 2\theta_2 + 2\theta_3))(\cos(4x_2) + 1)}{32} \\
& - \frac{(1 - \cos(-2\theta_1 + 2\theta_2 + 2\theta_3 + 4x_1))(\cos(4x_2) + 1)}{64} - \frac{(1 - \cos(2\theta_1 - 2\theta_2 + 2\theta_3 + 4x_1))(\cos(4x_2) + 1)}{64} - \frac{(1 - \cos(2\theta_1 - 2\theta_2 + 2\theta_3 - 4x_1))(\cos(4x_2) + 1)}{64} - \frac{(1 - \cos(2\theta_1 - 2\theta_2 + 2\theta_3 + 4x_1))(\cos(4x_2) + 1)}{64} \\
& - \frac{(1 - \cos(2\theta_1 + 2\theta_2 - 2\theta_3 - 4x_1))(\cos(4x_2) + 1)}{64} - \frac{(1 - \cos(2\theta_1 + 2\theta_2 - 2\theta_3 + 4x_1))(\cos(4x_2) + 1)}{64} - \frac{(1 - \cos(2\theta_1 + 2\theta_2 + 2\theta_3 - 4x_1))(\cos(4x_2) + 1)}{64} - \frac{(1 - \cos(2\theta_1 + 2\theta_2 + 2\theta_3 + 4x_1))(\cos(4x_2) + 1)}{64} \\
& + \frac{\cos(4x_2)}{4} - \frac{\cos(2\theta_1 - 2\theta_3)}{8} + \frac{\cos(2\theta_1 + 2\theta_3)}{8} + \frac{\cos(-2\theta_1 + 2\theta_2 + 2\theta_3)}{32} + \frac{\cos(-2\theta_1 + 2\theta_3 + 2x_1)}{8} - \frac{\cos(-2\theta_1 + 2\theta_3 + 4x_1)}{16} - \frac{\cos(-2\theta_1 + 2\theta_3 + 4x_2)}{16} + \frac{\cos(2\theta_1 - 2\theta_2 + 2\theta_3)}{32} + \frac{\cos(2\theta_1 + 2\theta_2 - 2\theta_3)}{32} \\
& + \frac{\cos(2\theta_1 + 2\theta_2 + 2\theta_3)}{32} - \frac{\cos(2\theta_1 - 2\theta_3 + 2x_1)}{8} - \frac{\cos(2\theta_1 - 2\theta_3 + 4x_1)}{16} - \frac{\cos(2\theta_1 - 2\theta_3 + 4x_2)}{16} + \frac{\cos(2\theta_1 + 2\theta_3 - 4x_1)}{16} - \frac{\cos(2\theta_1 + 2\theta_3 - 2x_1)}{8} + \frac{\cos(2\theta_1 + 2\theta_3 + 2x_1)}{8} + \frac{\cos(2\theta_1 + 2\theta_3 + 4x_1)}{16} \\
& + \frac{\cos(2\theta_1 + 2\theta_3 - 4x_2)}{16} + \frac{\cos(2\theta_1 + 2\theta_3 + 4x_2)}{8} - \frac{\cos(-2\theta_2 + 2\theta_3 + 4x_1)}{8} + \frac{\cos(2\theta_2 - 2\theta_3 + 4x_1)}{8} - \frac{\cos(2\theta_2 + 2\theta_3 - 4x_1)}{8} + \frac{\cos(2\theta_2 + 2\theta_3 + 4x_1)}{8} - \frac{\cos(-2\theta_1 + 2\theta_2 + 2\theta_3 + 2x_1)}{16} \\
& + \frac{\cos(-2\theta_1 + 2\theta_2 + 2\theta_3 + 4x_1)}{64} + \frac{\cos(-2\theta_1 + 2\theta_2 + 2\theta_3 + 4x_2)}{64} + \frac{\cos(-2\theta_1 + 2\theta_3 + 2x_1 + 4x_2)}{16} - \frac{\cos(-2\theta_1 + 2\theta_3 + 4x_1 + 4x_2)}{32} + \frac{\cos(2\theta_1 - 2\theta_2 - 2\theta_3 + 2x_1)}{16} + \frac{\cos(2\theta_1 - 2\theta_2 - 2\theta_3 + 4x_1)}{64} \\
& + \frac{\cos(2\theta_1 - 2\theta_2 - 2\theta_3 + 4x_2)}{64} + \frac{\cos(2\theta_1 - 2\theta_2 + 2\theta_3 - 4x_1)}{64} - \frac{\cos(2\theta_1 - 2\theta_2 + 2\theta_3 - 2x_1)}{16} + \frac{\cos(2\theta_1 - 2\theta_2 + 2\theta_3 + 2x_1)}{16} + \frac{\cos(2\theta_1 - 2\theta_2 + 2\theta_3 + 4x_1)}{64} + \frac{\cos(2\theta_1 - 2\theta_2 + 2\theta_3 - 4x_2)}{64} \\
& + \frac{\cos(2\theta_1 - 2\theta_2 + 2\theta_3 + 4x_2)}{64} + \frac{\cos(2\theta_1 + 2\theta_2 - 2\theta_3 - 4x_1)}{64} - \frac{\cos(2\theta_1 + 2\theta_2 - 2\theta_3 - 2x_1)}{16} + \frac{\cos(2\theta_1 + 2\theta_2 - 2\theta_3 + 2x_1)}{16} + \frac{\cos(2\theta_1 + 2\theta_2 - 2\theta_3 + 4x_1)}{64} + \frac{\cos(2\theta_1 + 2\theta_2 - 2\theta_3 - 4x_2)}{64} \\
& + \frac{\cos(2\theta_1 + 2\theta_2 - 2\theta_3 + 4x_2)}{64} + \frac{\cos(2\theta_1 + 2\theta_2 + 2\theta_3 - 4x_1)}{64} - \frac{\cos(2\theta_1 + 2\theta_2 + 2\theta_3 - 2x_1)}{16} + \frac{\cos(2\theta_1 + 2\theta_2 + 2\theta_3 + 2x_1)}{16} + \frac{\cos(2\theta_1 + 2\theta_2 + 2\theta_3 + 4x_1)}{64} + \frac{\cos(2\theta_1 + 2\theta_2 + 2\theta_3 - 4x_2)}{64} \\
& + \frac{\cos(2\theta_1 + 2\theta_2 + 2\theta_3 + 4x_2)}{64} - \frac{\cos(2\theta_1 - 2\theta_3 - 4x_1 + 4x_2)}{32} + \frac{\cos(2\theta_1 - 2\theta_3 - 2x_1 + 4x_2)}{16} - \frac{\cos(2\theta_1 - 2\theta_3 + 2x_1 - 4x_2)}{16} - \frac{\cos(2\theta_1 - 2\theta_3 + 2x_1 + 4x_2)}{16} - \frac{\cos(2\theta_1 - 2\theta_3 + 4x_1 - 4x_2)}{32} \\
& - \frac{\cos(2\theta_1 - 2\theta_3 + 4x_1 + 4x_2)}{32} + \frac{\cos(2\theta_1 + 2\theta_3 - 4x_1 - 4x_2)}{32} + \frac{\cos(2\theta_1 + 2\theta_3 - 4x_1 + 4x_2)}{32} - \frac{\cos(2\theta_1 + 2\theta_3 - 2x_1 - 4x_2)}{16} - \frac{\cos(2\theta_1 + 2\theta_3 - 2x_1 + 4x_2)}{16} + \frac{\cos(2\theta_1 + 2\theta_3 + 2x_1 - 4x_2)}{16}
\end{aligned}$$

$$\begin{aligned}
& + \frac{\cos(2\theta_1 + 2\theta_3 + 2x_1 + 4x_2)}{16} + \frac{\cos(2\theta_1 + 2\theta_3 + 4x_1 - 4x_2)}{32} + \frac{\cos(2\theta_1 + 2\theta_3 + 4x_1 + 4x_2)}{32} - \frac{\cos(-2\theta_1 - 2\theta_2 + 2\theta_3 + 2x_1 + 4x_2)}{32} + \frac{\cos(-2\theta_1 - 2\theta_2 + 2\theta_3 + 4x_1 + 4x_2)}{128} - \frac{\cos(-2\theta_1 + 2\theta_2 - 2\theta_3 + 2x_1 + 4x_2)}{32} \\
& + \frac{\cos(-2\theta_1 + 2\theta_2 - 2\theta_3 + 4x_1 + 4x_2)}{128} + \frac{\cos(-2\theta_1 + 2\theta_2 + 2\theta_3 - 4x_1 + 4x_2)}{128} + \frac{\cos(-2\theta_1 + 2\theta_2 + 2\theta_3 - 2x_1 + 4x_2)}{32} - \frac{\cos(-2\theta_1 + 2\theta_2 + 2x_1 - 4x_2)}{32} - \frac{\cos(-2\theta_1 + 2\theta_2 + 2\theta_3 + 2x_1 + 4x_2)}{32} \\
& + \frac{\cos(-2\theta_1 + 2\theta_2 + 2\theta_3 + 4x_1 - 4x_2)}{128} + \frac{\cos(-2\theta_1 + 2\theta_2 + 2\theta_3 + 4x_1 + 4x_2)}{128} + \frac{\cos(2\theta_1 - 2\theta_2 - 2\theta_3 + 2x_1 + 4x_2)}{32} + \frac{\cos(2\theta_1 - 2\theta_2 - 2\theta_3 + 4x_1 + 4x_2)}{128} + \frac{\cos(2\theta_1 - 2\theta_2 + 2\theta_3 - 4x_1 + 4x_2)}{128} \\
& - \frac{\cos(2\theta_1 - 2\theta_2 + 2\theta_3 - 2x_1 + 4x_2)}{32} + \frac{\cos(2\theta_1 - 2\theta_2 + 2\theta_3 + 2x_1 - 4x_2)}{32} + \frac{\cos(2\theta_1 - 2\theta_2 + 2\theta_3 + 2x_1 + 4x_2)}{32} + \frac{\cos(2\theta_1 - 2\theta_2 + 2\theta_3 + 4x_1 - 4x_2)}{128} + \frac{\cos(2\theta_1 - 2\theta_2 + 2\theta_3 + 4x_1 + 4x_2)}{128} \\
& + \frac{\cos(2\theta_1 + 2\theta_2 - 2\theta_3 - 4x_1 + 4x_2)}{128} - \frac{\cos(2\theta_1 + 2\theta_2 - 2\theta_3 - 2x_1 + 4x_2)}{32} + \frac{\cos(2\theta_1 + 2\theta_2 - 2\theta_3 + 2x_1 - 4x_2)}{32} + \frac{\cos(2\theta_1 + 2\theta_2 - 2\theta_3 + 2x_1 + 4x_2)}{32} + \frac{\cos(2\theta_1 + 2\theta_2 - 2\theta_3 + 4x_1 - 4x_2)}{128} \\
& + \frac{\cos(2\theta_1 + 2\theta_2 - 2\theta_3 + 4x_1 + 4x_2)}{128} + \frac{\cos(2\theta_1 + 2\theta_2 + 2\theta_3 - 4x_1 - 4x_2)}{128} + \frac{\cos(2\theta_1 + 2\theta_2 + 2\theta_3 - 4x_1 + 4x_2)}{128} - \frac{\cos(2\theta_1 + 2\theta_2 + 2\theta_3 - 2x_1 - 4x_2)}{32} - \frac{\cos(2\theta_1 + 2\theta_2 + 2\theta_3 - 2x_1 + 4x_2)}{32} \\
& + \frac{\cos(2\theta_1 + 2\theta_2 + 2\theta_3 + 2x_1 - 4x_2)}{32} + \frac{\cos(2\theta_1 + 2\theta_2 + 2\theta_3 + 2x_1 + 4x_2)}{32} + \frac{\cos(2\theta_1 + 2\theta_2 + 2\theta_3 + 4x_1 - 4x_2)}{128} + \frac{\cos(2\theta_1 + 2\theta_2 + 2\theta_3 + 4x_1 + 4x_2)}{128} + \frac{1}{4}
\end{aligned}$$

Eq S3

$$2(\sin(\theta_{11y}) \sin(x_1) \sin(x_2) + \cos(\theta_{11y}) \cos(x_1) \cos(x_2))^2 \cos^2(x_3) + 2(\sin(\theta_{11y}) \sin(x_1) \cos(x_2) - \sin(x_2) \cos(\theta_{11y}) \cos(x_1))^2 \sin^2(x_3) - 1$$

Eq S4

$$\begin{aligned}
& -4 \sin^2(\theta_{11y}) \sin^4(x_1) + 4 \sin^2(\theta_{11y}) \sin^2(x_1) - 16 \sin^2(\theta_{11y}) \sin^4(x_2) \sin^4(x_3) + 16 \sin^2(\theta_{11y}) \sin^4(x_2) \sin^2(x_3) - 4 \sin^2(\theta_{11y}) \sin^4(x_2) + 16 \sin^2(\theta_{11y}) \sin^2(x_2) \sin^4(x_3) - 16 \sin^2(\theta_{11y}) \sin^2(x_2) \sin^2(x_3) + 4 \sin^2(\theta_{11y}) \sin^2(x_2) - 4 \sin^2(\theta_{11y}) \sin^4(x_3) + 4 \sin^2(\theta_{11y}) \sin^2(x_3) - 2 \sin^2(\theta_{11y}) - 16 \sin(\theta_{11y}) \sin^3(x_1) \sin^3(x_2) \cos(\theta_{11y}) \cos(x_1) \cos(x_2) + 8 \sin(\theta_{11y}) \sin^3(x_1) \sin(x_2) \cos(\theta_{11y}) \cos(x_1) \cos(x_2) + 8 \sin(\theta_{11y}) \sin(x_1) \sin^3(x_2) \cos(\theta_{11y}) \cos(x_1) \cos(x_2) + 16 \sin(\theta_{11y}) \sin(x_1) \sin(x_2) \sin^4(x_3) \cos(\theta_{11y}) \cos(x_1) \cos(x_2) - 16 \sin(\theta_{11y}) \sin(x_1) \sin(x_2) \sin^2(x_3) \cos(\theta_{11y}) \cos(x_1) \cos(x_2) + 32 \sin^4(x_1) \sin^4(x_2) \sin^4(x_3) - 32 \sin^4(x_1) \sin^4(x_2) \sin^2(x_3) + 8 \sin^4(x_1) \sin^4(x_2) - 32 \sin^4(x_1) \sin^2(x_2) \sin^4(x_3) + 32 \sin^4(x_1) \sin^2(x_2) \sin^2(x_3) - 8 \sin^4(x_1) \sin^2(x_2) + 8 \sin^4(x_1) \sin^4(x_3) - 8 \sin^4(x_1) \sin^2(x_3) + 4 \sin^4(x_1) - 32 \sin^2(x_1) \sin^4(x_2) \sin^4(x_3) + 32 \sin^2(x_1) \sin^4(x_2) \sin^2(x_3) - 8 \sin^2(x_1) \sin^4(x_2) + 32 \sin^2(x_1) \sin^2(x_2) \sin^4(x_3) - 32 \sin^2(x_1) \sin^2(x_2) \sin^2(x_3) + 8 \sin^2(x_1) \sin^2(x_2) - 8 \sin^2(x_1) \sin^4(x_3) + 8 \sin^2(x_1) \sin^2(x_3) - 4 \sin^2(x_1) + 16 \sin^4(x_2) \sin^4(x_3) - 16 \sin^4(x_2) \sin^2(x_3) + 4 \sin^4(x_2) - 16 \sin^2(x_2) \sin^4(x_3) + 16 \sin^2(x_2) \sin^2(x_3) - 4 \sin^2(x_2) + 4 \sin^4(x_3) - 4 \sin^2(x_3) + 1
\end{aligned}$$

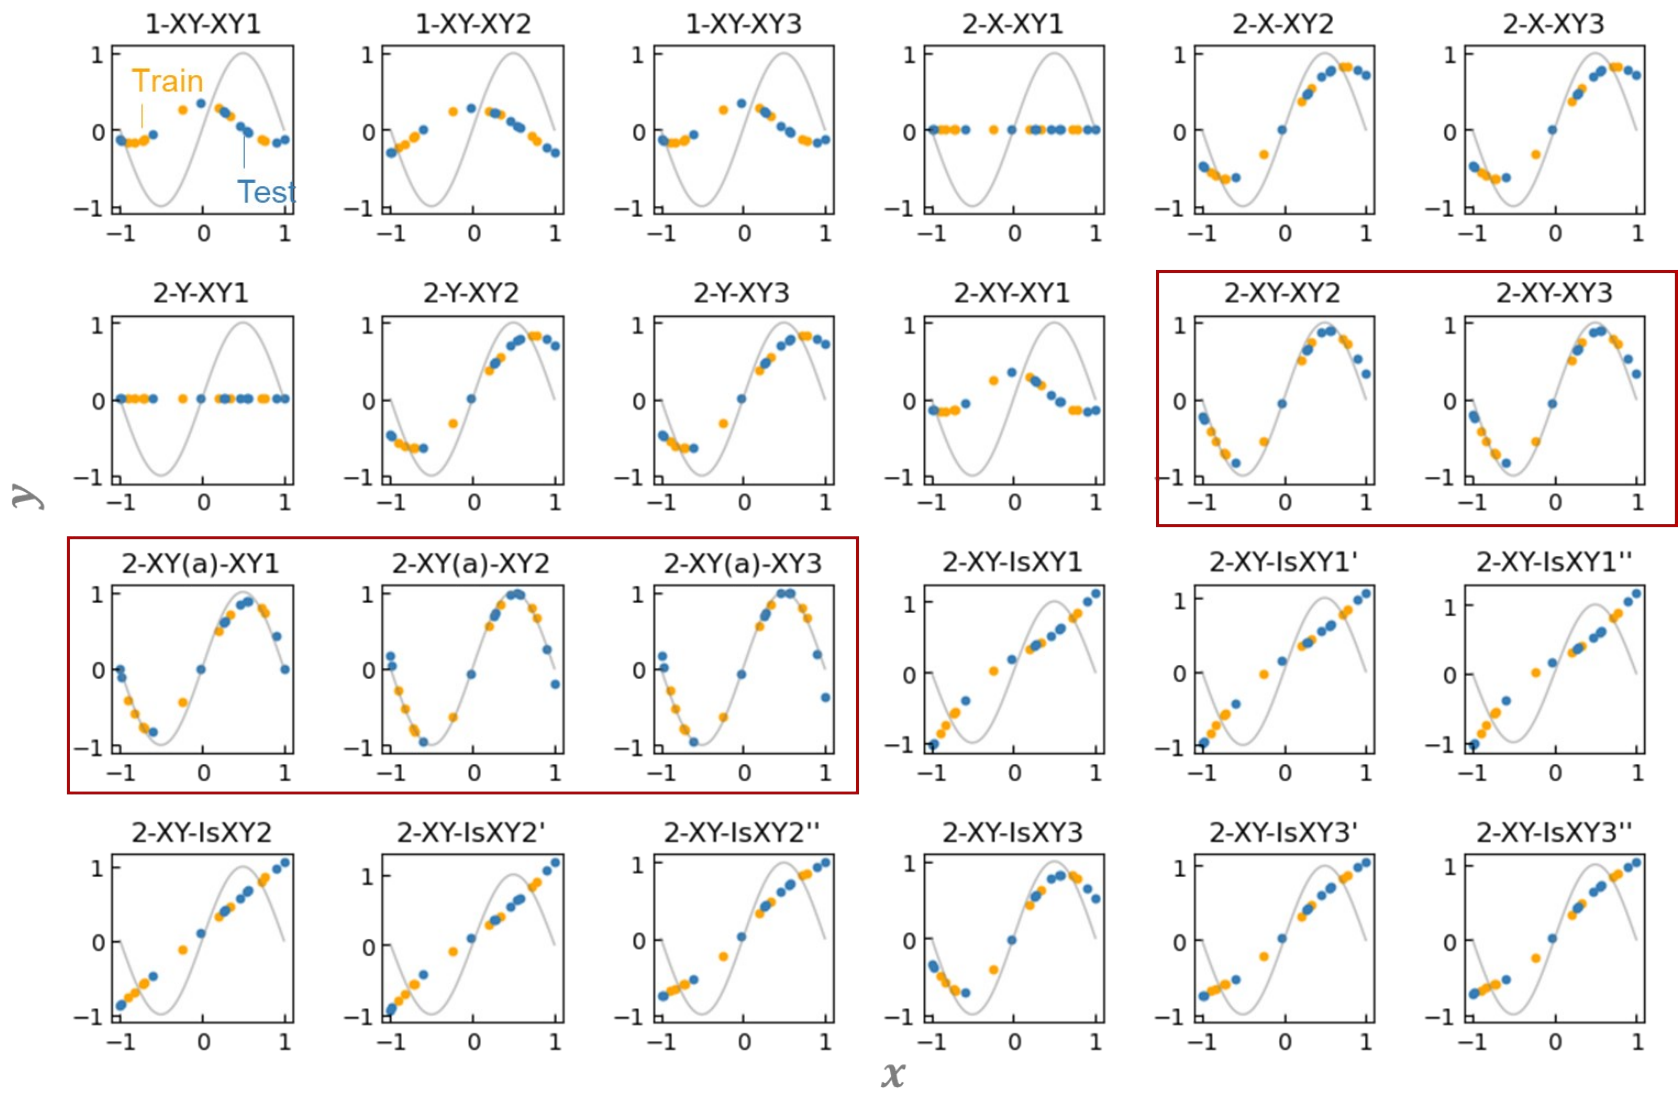

a)

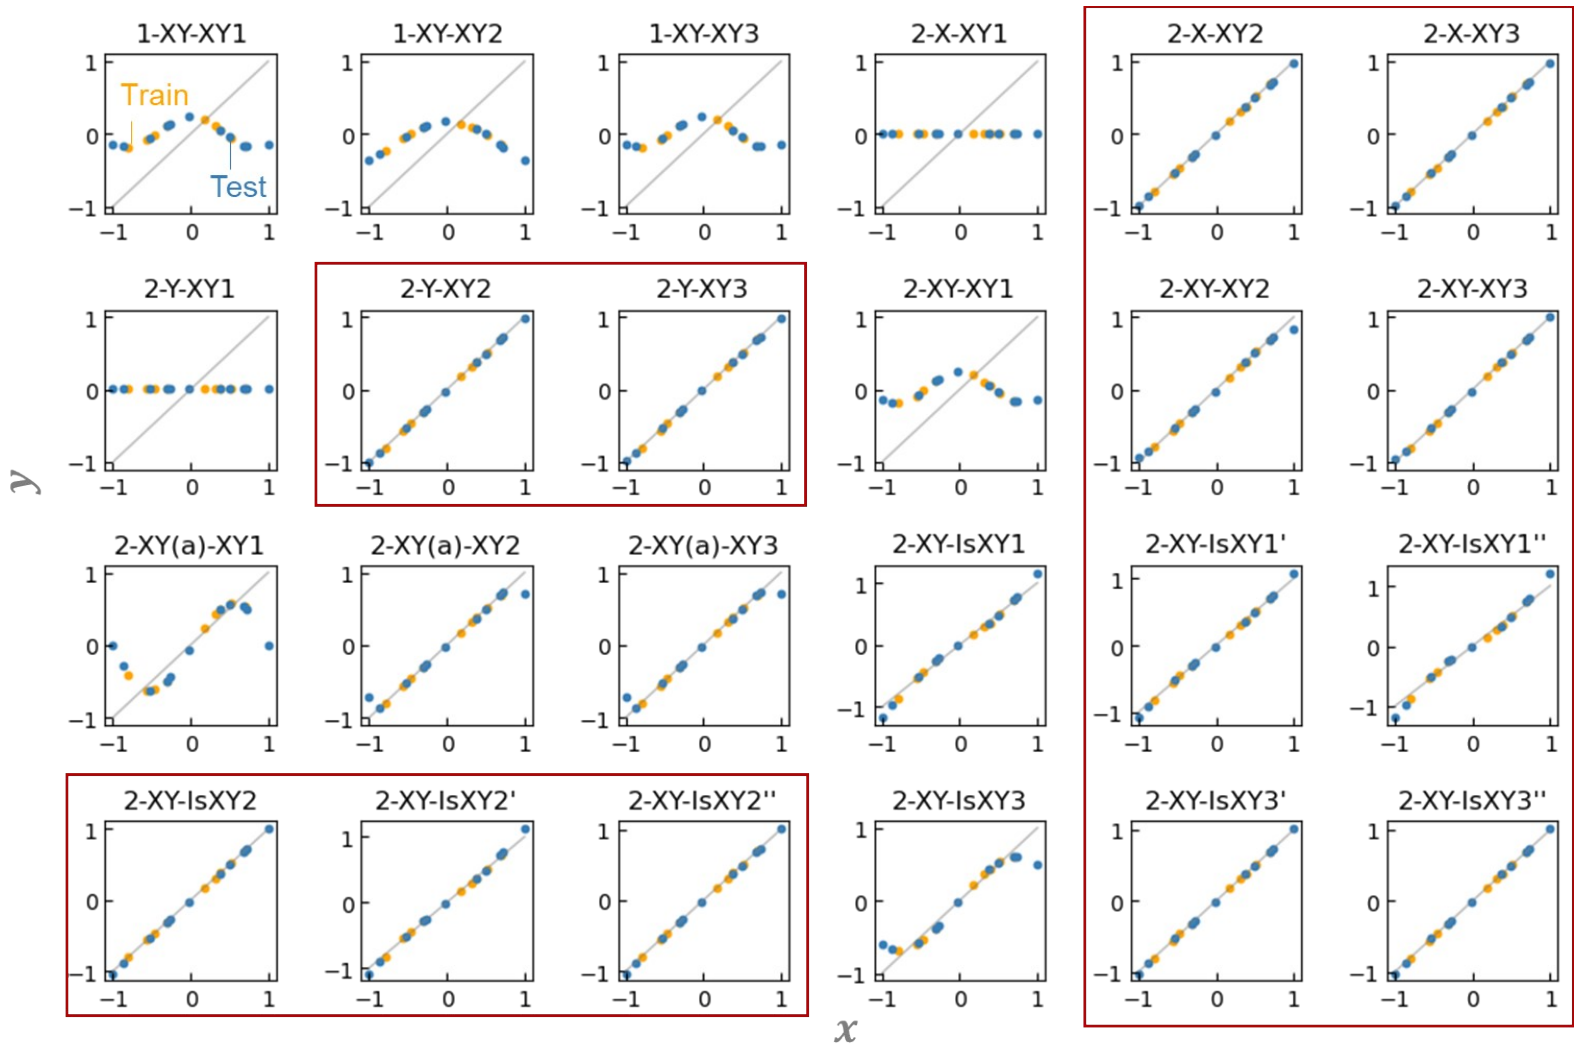

b)



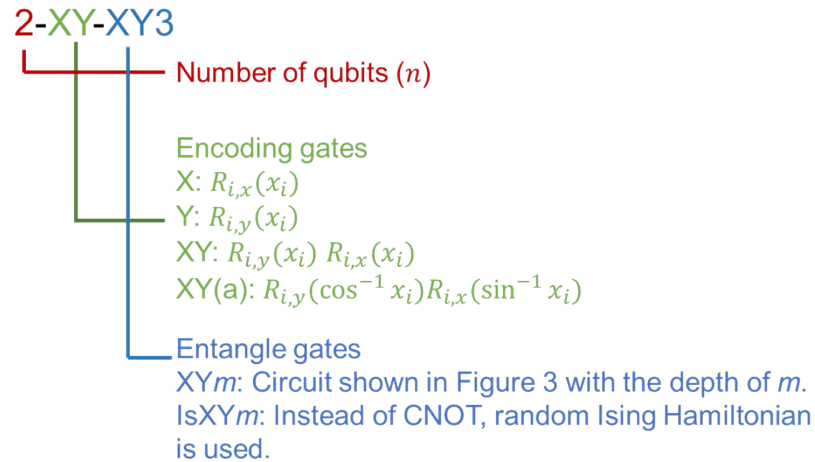

c)

Figure S 1 Regression results with different quantum circuits, fitting a)  $y = \sin^{\frac{m}{m+1}}(x)$  and b)  $y = x$ . Successful results are marked red. Regressions were repeated three times with Ising-type circuits (IsXY $m$ ) because the results changed randomly. c) Explanation of circuit configuration.

NOTE: The best circuit configuration (2-XY-XY $m$ ) was selected for the following reasons. One qubit circuit could not fit the one-dimensional functions (e.g., 1-XY-XY3). For initial encoding, only the use of  $R_y$  gates was sufficient to fit the linear function (e.g., 2-Y-XY2 and 2-Y-XY3). However, additional  $R_x$  gates were needed for a non-linear  $\sin^{\frac{m}{m+1}}(x)$  function (e.g., 2-XY-XY2 and 2-XY-XY3). Preprocessing of explanatory variables with  $\cos^{-1} x_i$  and  $\sin^{-1} x_i$  was not successful with the linear function (e.g., 2-XY(a)-XY3). The use of Ising Hamiltonian instead of CNOT circuits led to more unstable regressions due to the randomness (e.g., 2-XY-IsXY3).

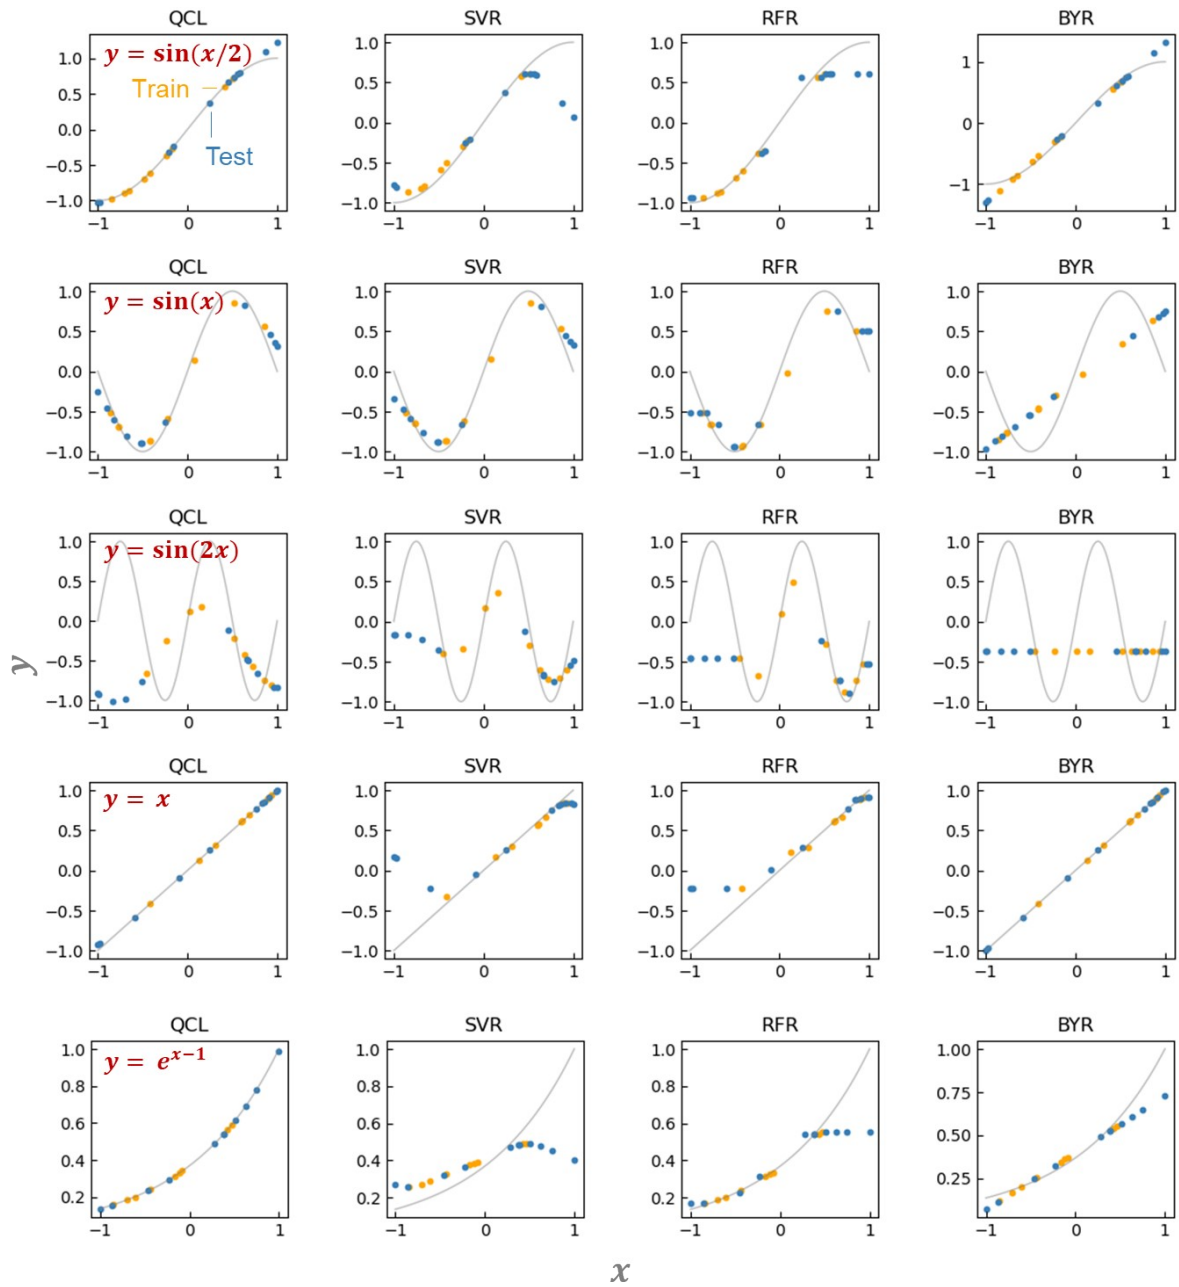

Figure S 2 Full regression results for Figure 4a.

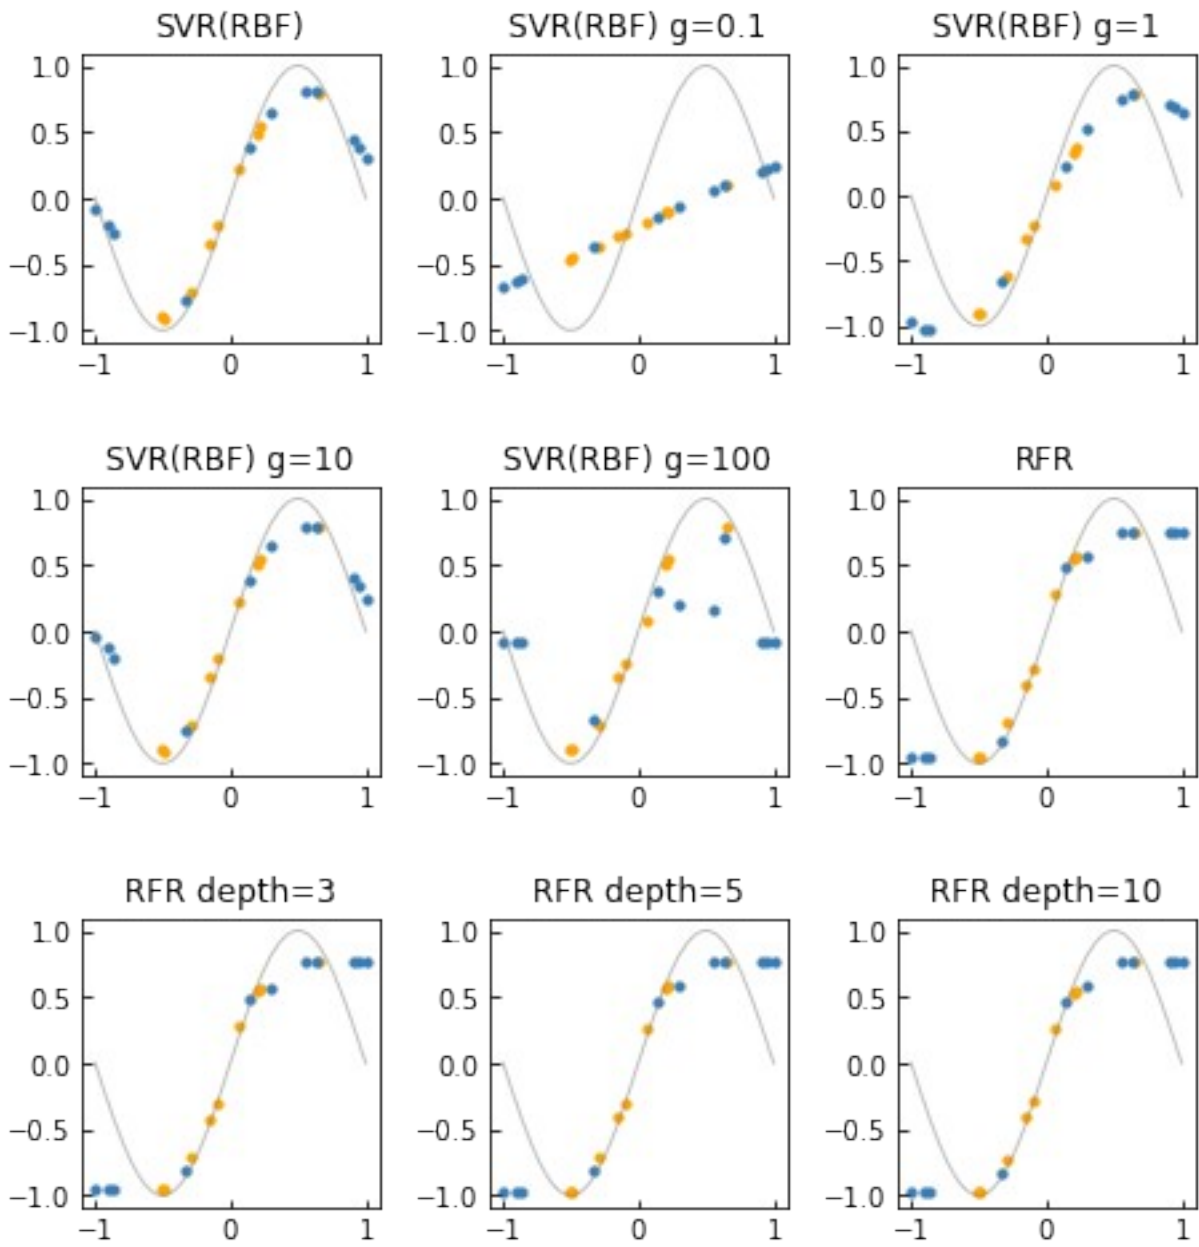

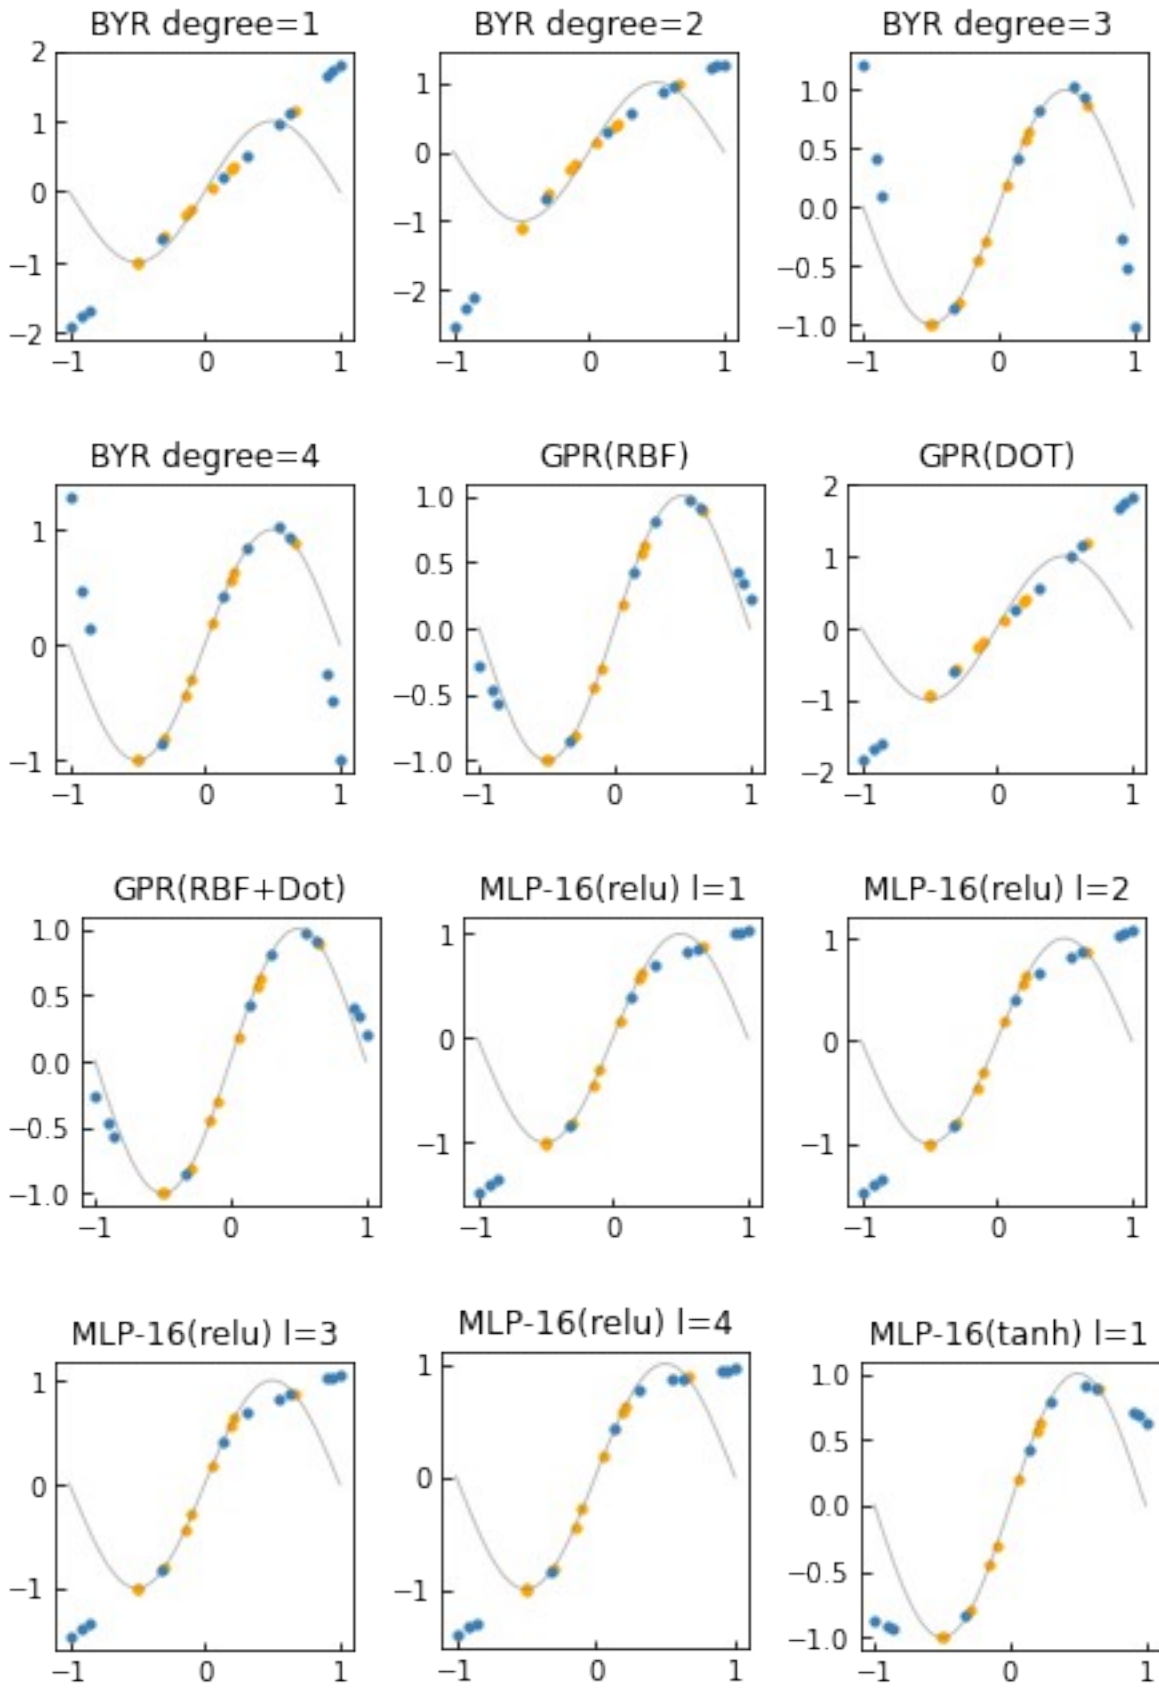

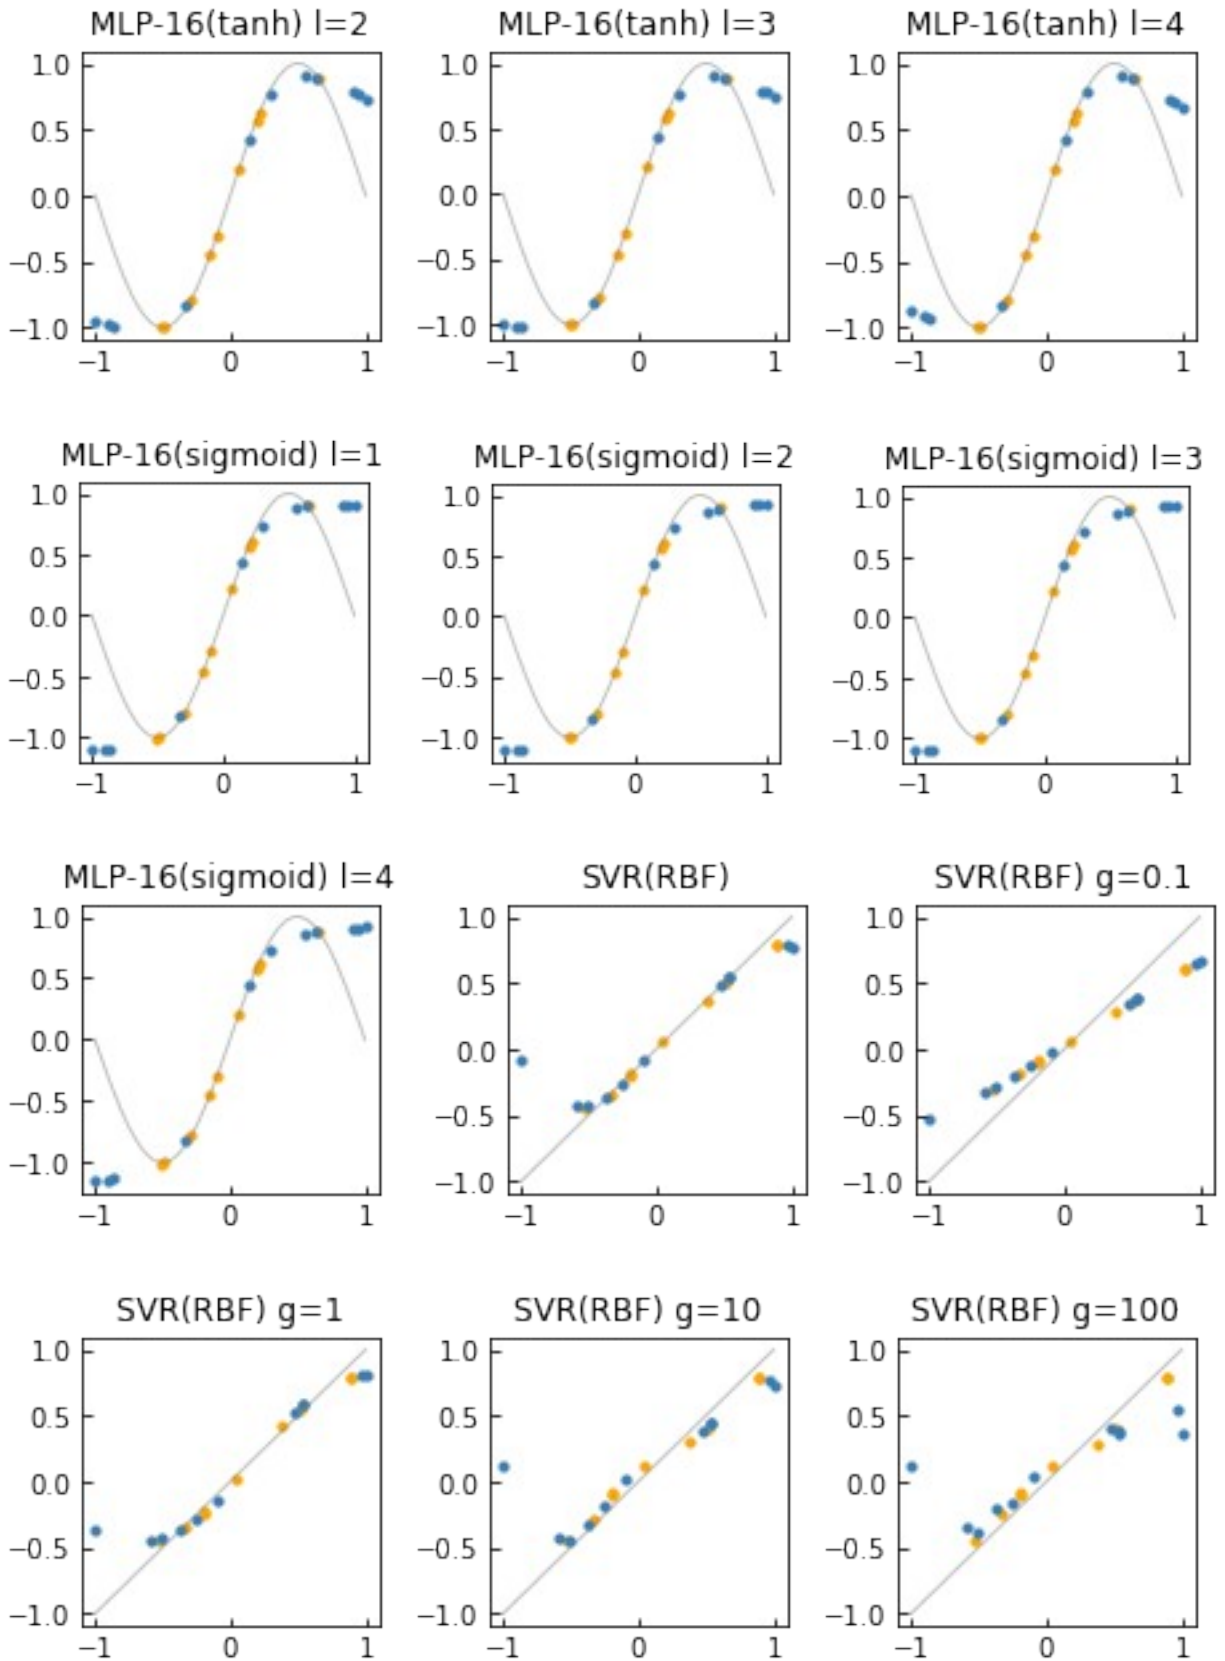

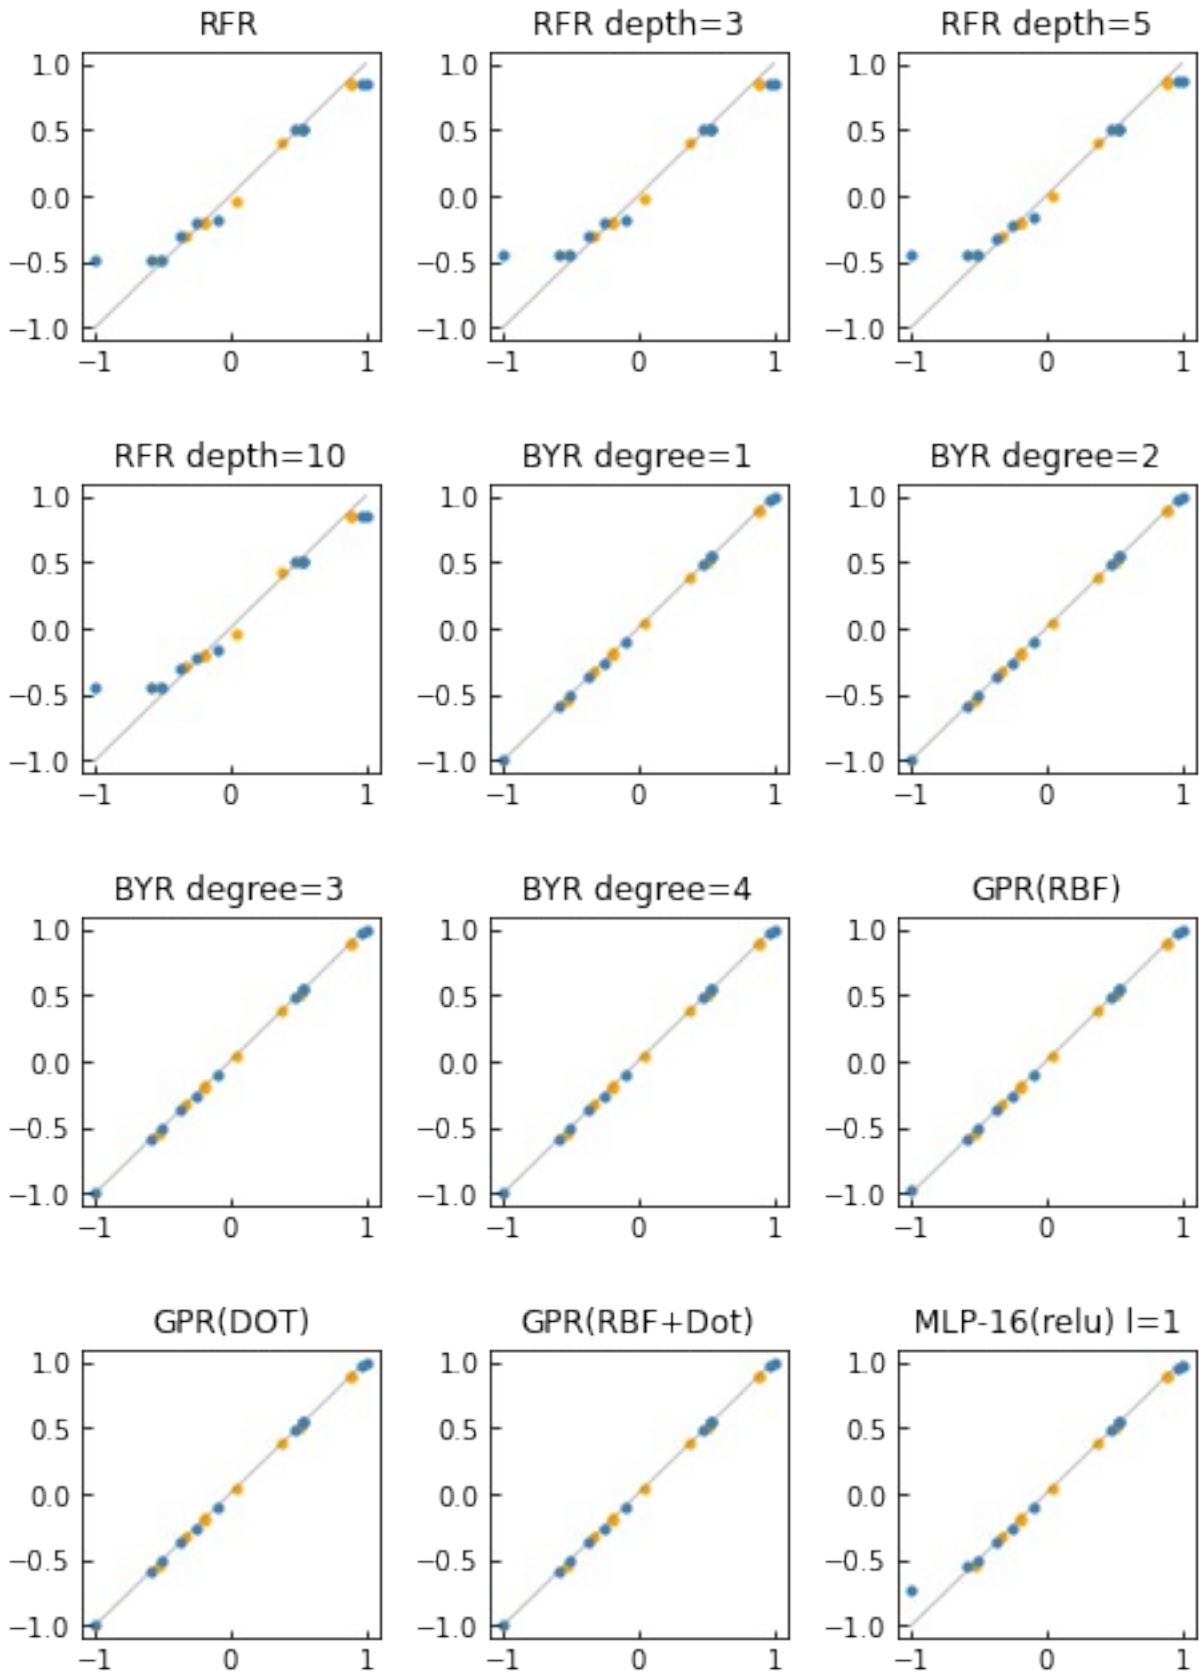

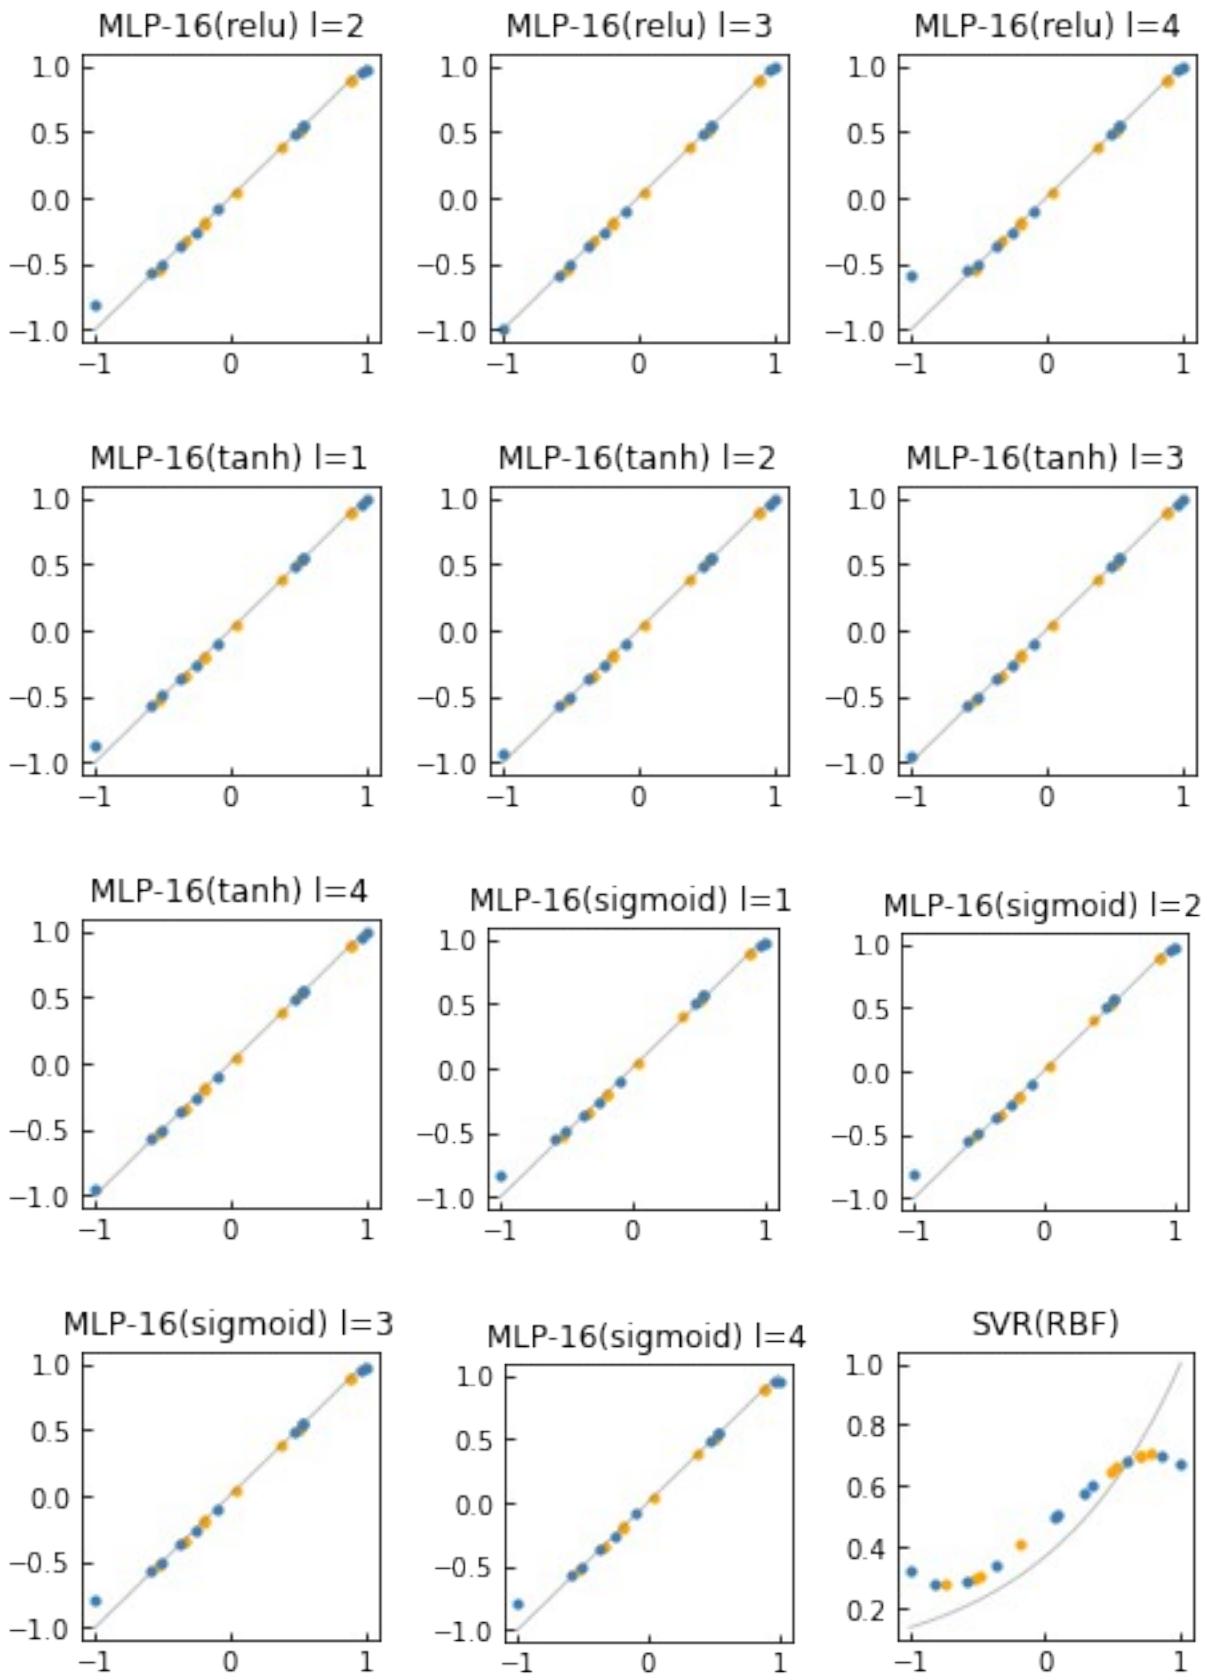

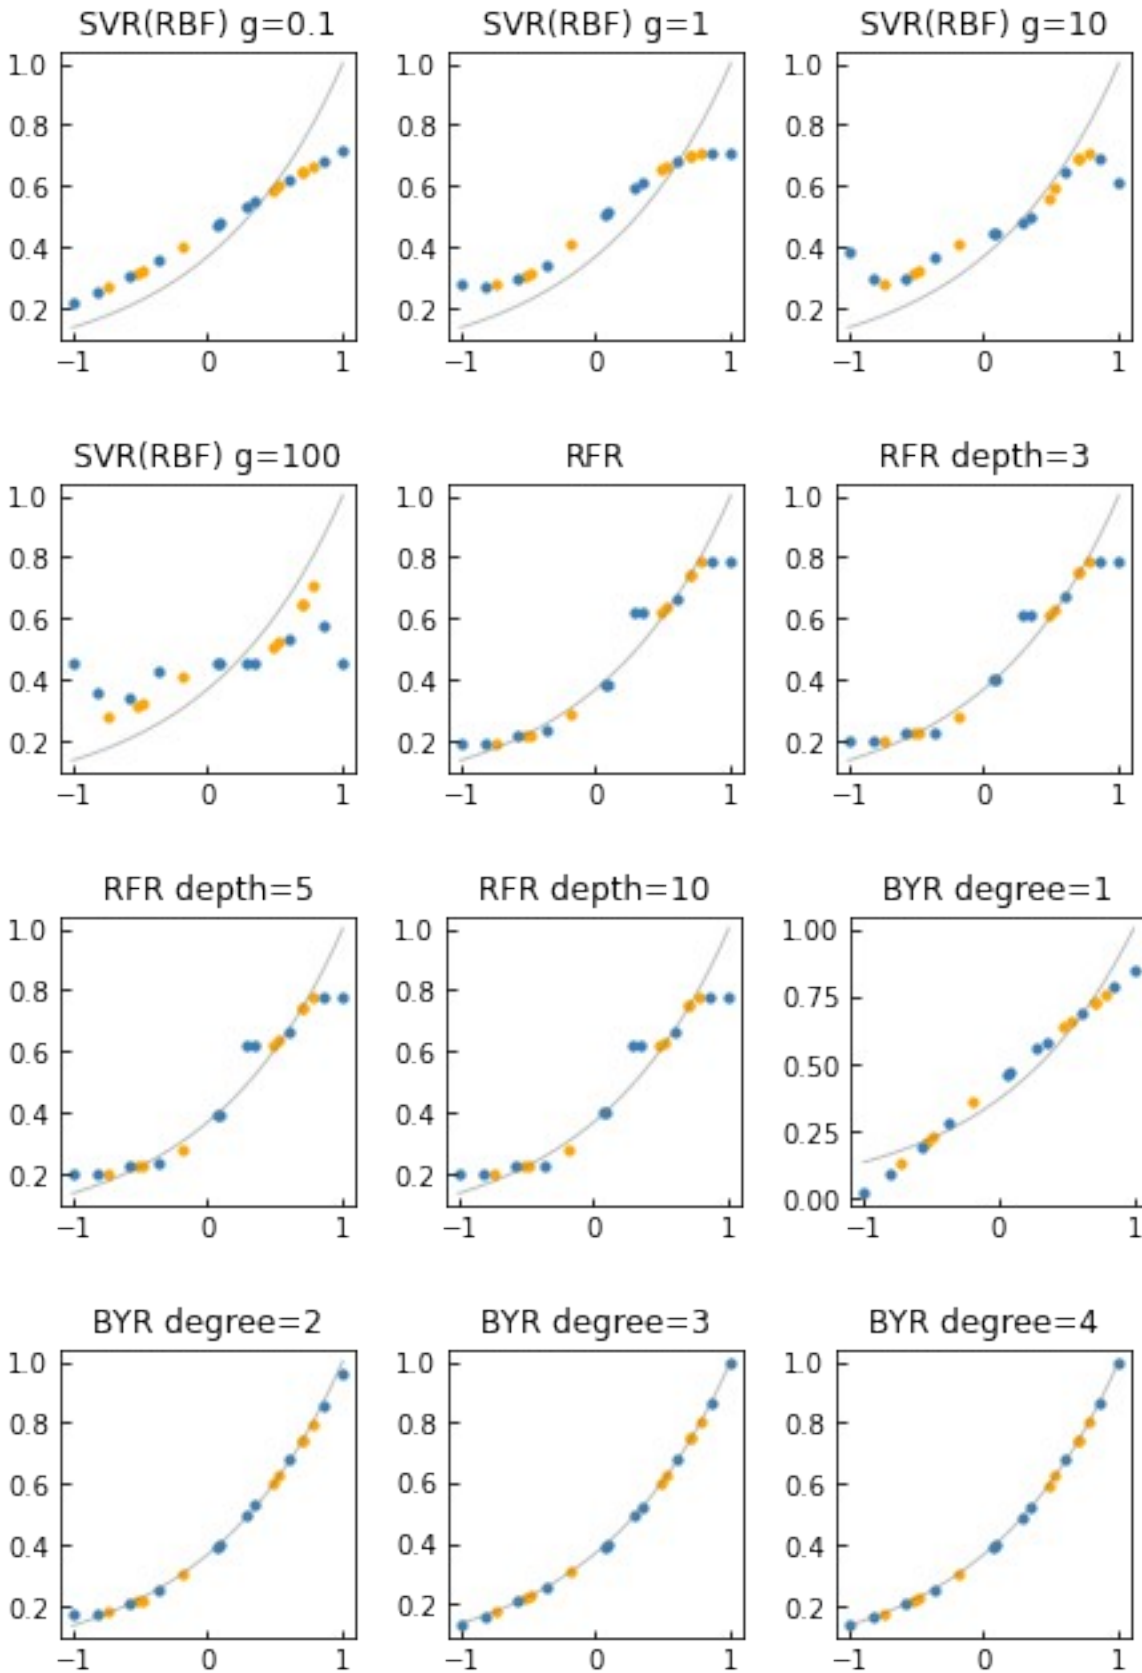



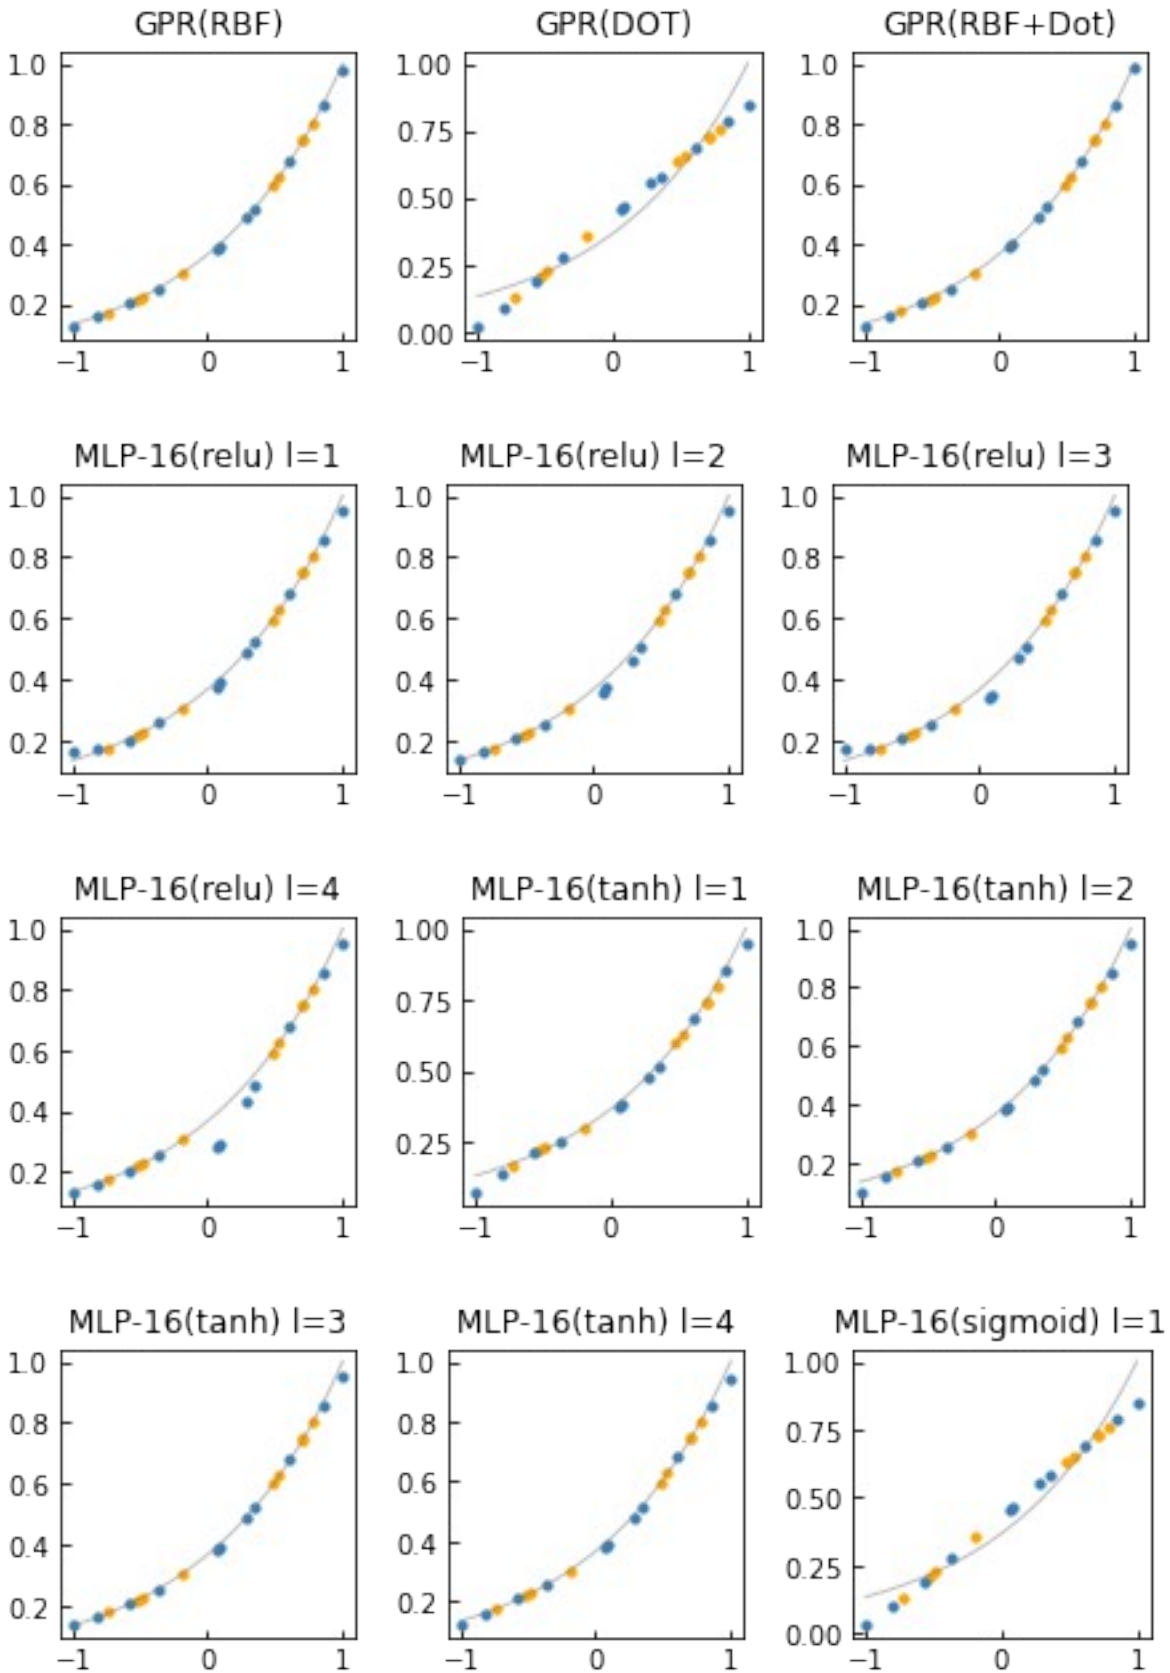

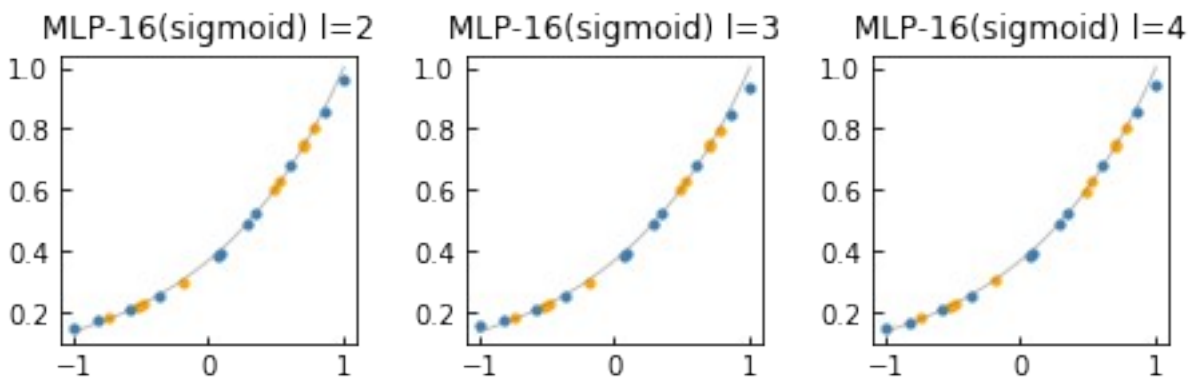

Figure S 3 Additional regression results for Figure S 2 using conventional machine learning models with various hyperparameters. Details of the models are explained in Table S2. The polynomial regression by BYR (degree  $> 1$ ) could basically fit the three functions. However, the regression was unstable; it could easily induce overfitting and substantial prediction errors, as observed in Figure S 4 and Table S3.

**Table S2** Explanations of the conventional models.<sup>a)</sup>

| Expression                 | Model name                           | Hyperparameter                                 |
|----------------------------|--------------------------------------|------------------------------------------------|
| <b>SVR(RBF)</b>            | SVR                                  | kernel = “rbf”, gamma = “auto”                 |
| <b>SVR(RBF) g=0.1</b>      | SVR                                  | kernel = “rbf”, gamma = 0.1                    |
| <b>SVR(RBF) g=1</b>        | SVR                                  | kernel = “rbf”, gamma = 1                      |
| <b>SVR(RBF) g=10</b>       | SVR                                  | kernel = “rbf”, gamma = 10                     |
| <b>SVR(RBF) g=100</b>      | SVR                                  | kernel = “rbf”, gamma = 100                    |
| <b>RFR</b>                 | RandomForestRegressor                | (default)                                      |
| <b>RFR depth=3</b>         | RandomForestRegressor                | max_depth=3                                    |
| <b>RFR depth=5</b>         | RandomForestRegressor                | max_depth=5                                    |
| <b>RFR depth=10</b>        | RandomForestRegressor                | max_depth=10                                   |
| <b>BYR degree=1</b>        | BayesianRidge                        | (default)                                      |
| <b>BYR degree=2</b>        | BayesianRidge                        | (default) Convert $x$ to $x + x^2$             |
| <b>BYR degree=3</b>        | BayesianRidge                        | (default) Convert $x$ to $x + x^2 + x^3$       |
| <b>BYR degree=4</b>        | BayesianRidge                        | (default) Convert $x$ to $x + x^2 \dots + x^4$ |
| <b>GPR(RBF)</b>            | GaussianProcessRegressor             | kernel=RBF + WhiteKernel                       |
| <b>GPR(DOT)</b>            | GaussianProcessRegressor             | kernel=DotProduct + WhiteKernel                |
| <b>GPR(RBF+Dot)</b>        | GaussianProcessRegressor             | kernel=RBF+DotProduct + WhiteKernel            |
| <b>MLP-16(relu) l=1</b>    | Multi layer perceptron <sup>b)</sup> | One hidden layer, ReLu activation              |
| <b>MLP-16(relu) l=2</b>    | Multi layer perceptron <sup>b)</sup> | Two hidden layers, ReLu activation             |
| <b>MLP-16(relu) l=3</b>    | Multi layer perceptron <sup>b)</sup> | Three hidden layers, ReLu activation           |
| <b>MLP-16(relu) l=4</b>    | Multi layer perceptron <sup>b)</sup> | Four hidden layers, ReLu activation            |
| <b>MLP-16(tanh) l=1</b>    | Multi layer perceptron <sup>b)</sup> | One hidden layer, tanh activation              |
| <b>MLP-16(tanh) l=2</b>    | Multi layer perceptron <sup>b)</sup> | Two hidden layers, tanh activation             |
| <b>MLP-16(tanh) l=3</b>    | Multi layer perceptron <sup>b)</sup> | Three hidden layers, tanh activation           |
| <b>MLP-16(tanh) l=4</b>    | Multi layer perceptron <sup>b)</sup> | Four hidden layers, tanh activation            |
| <b>MLP-16(sigmoid) l=1</b> | Multi layer perceptron <sup>b)</sup> | One hidden layer, sigmoid activation           |
| <b>MLP-16(sigmoid) l=2</b> | Multi layer perceptron <sup>b)</sup> | Two hidden layers, sigmoid activation          |
| <b>MLP-16(sigmoid) l=3</b> | Multi layer perceptron <sup>b)</sup> | Three hidden layers, sigmoid activation        |
| <b>MLP-16(sigmoid) l=4</b> | Multi layer perceptron <sup>b)</sup> | Four hidden layers, sigmoid activation         |

a) Except for MLP, regressions models were made using a scikit-learn (version 1.0.2) library. Default hyperparameters were used unless noted otherwise. The document is available at [https://scikit-learn.org/stable/whats\\_new/v1.0.html](https://scikit-learn.org/stable/whats_new/v1.0.html).

b) MLP was implemented by a Keras (version 2.9.0) library. The dimension of the hidden layers was 16.

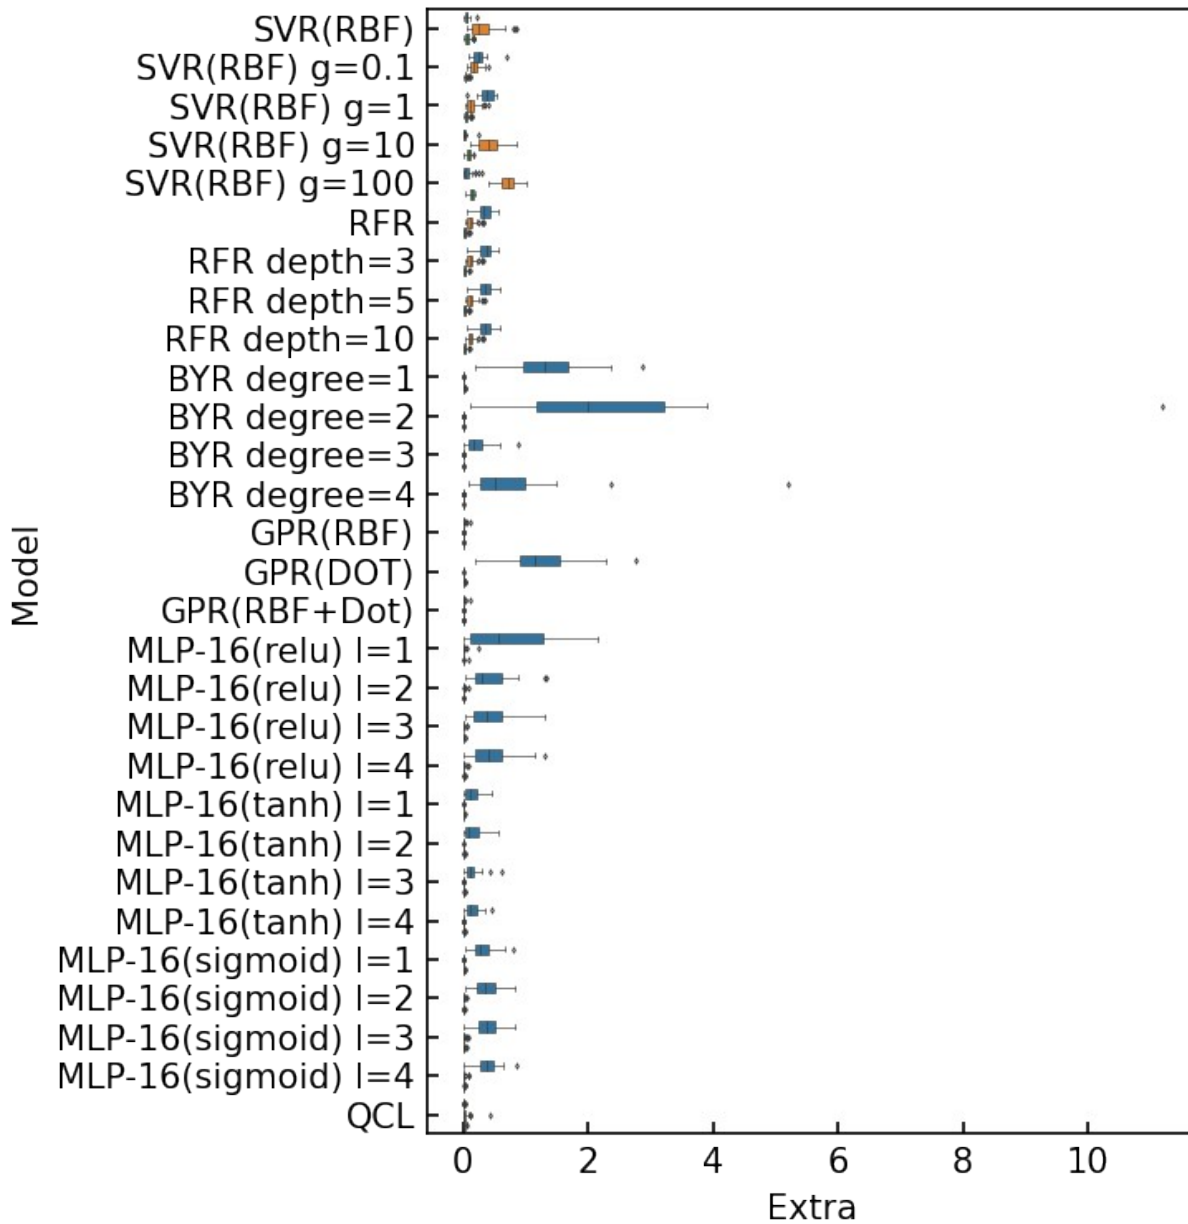

a)

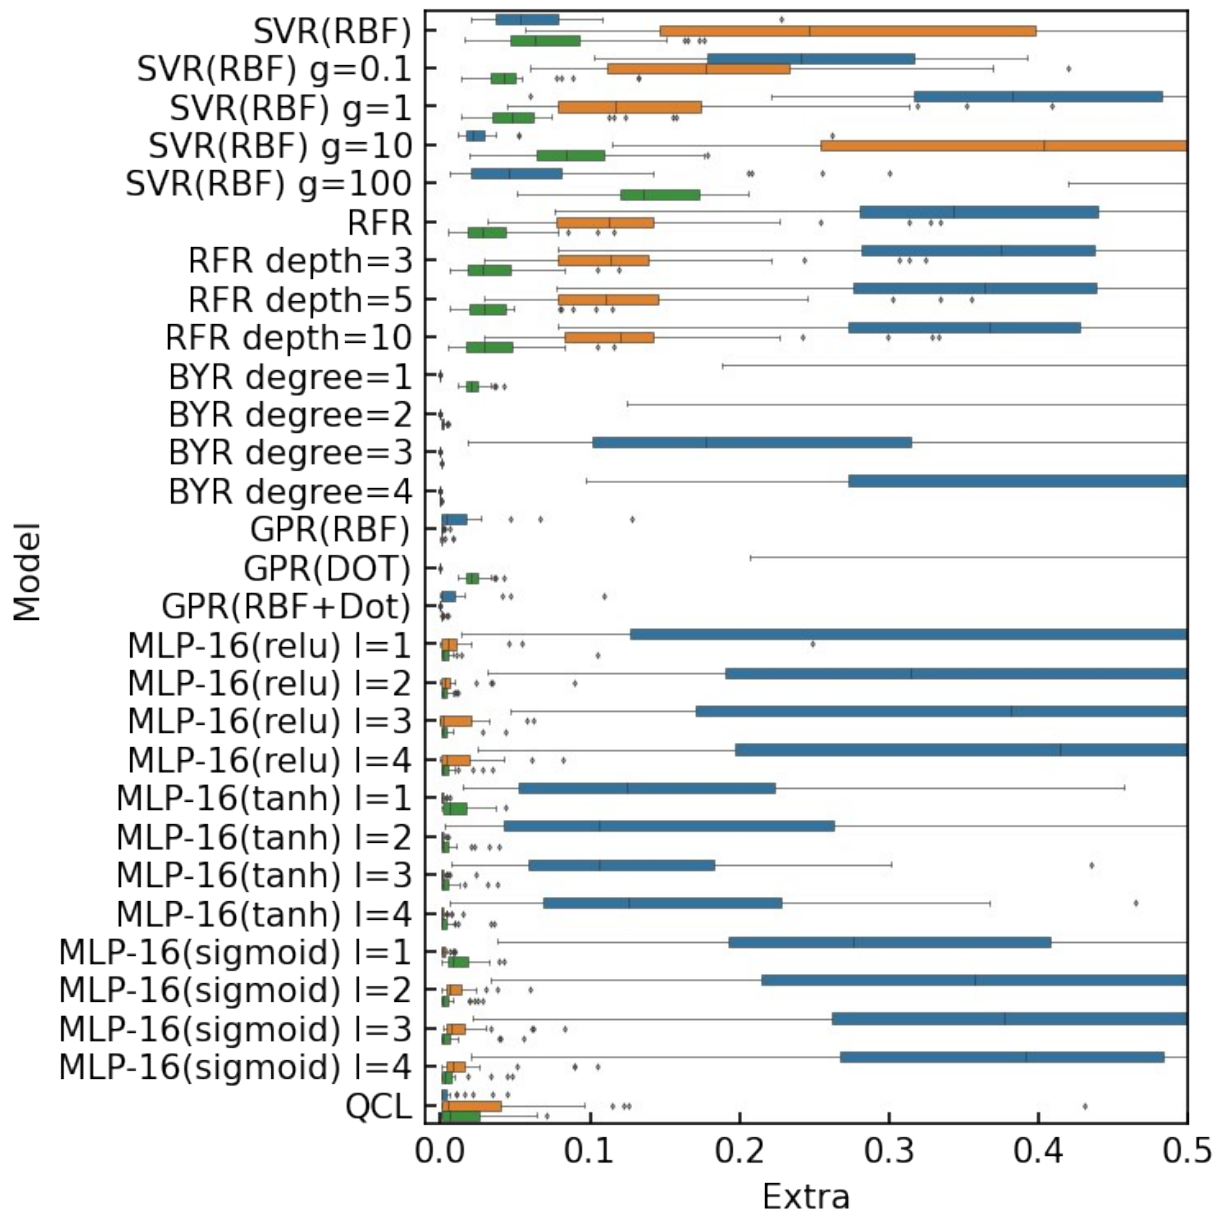

b)

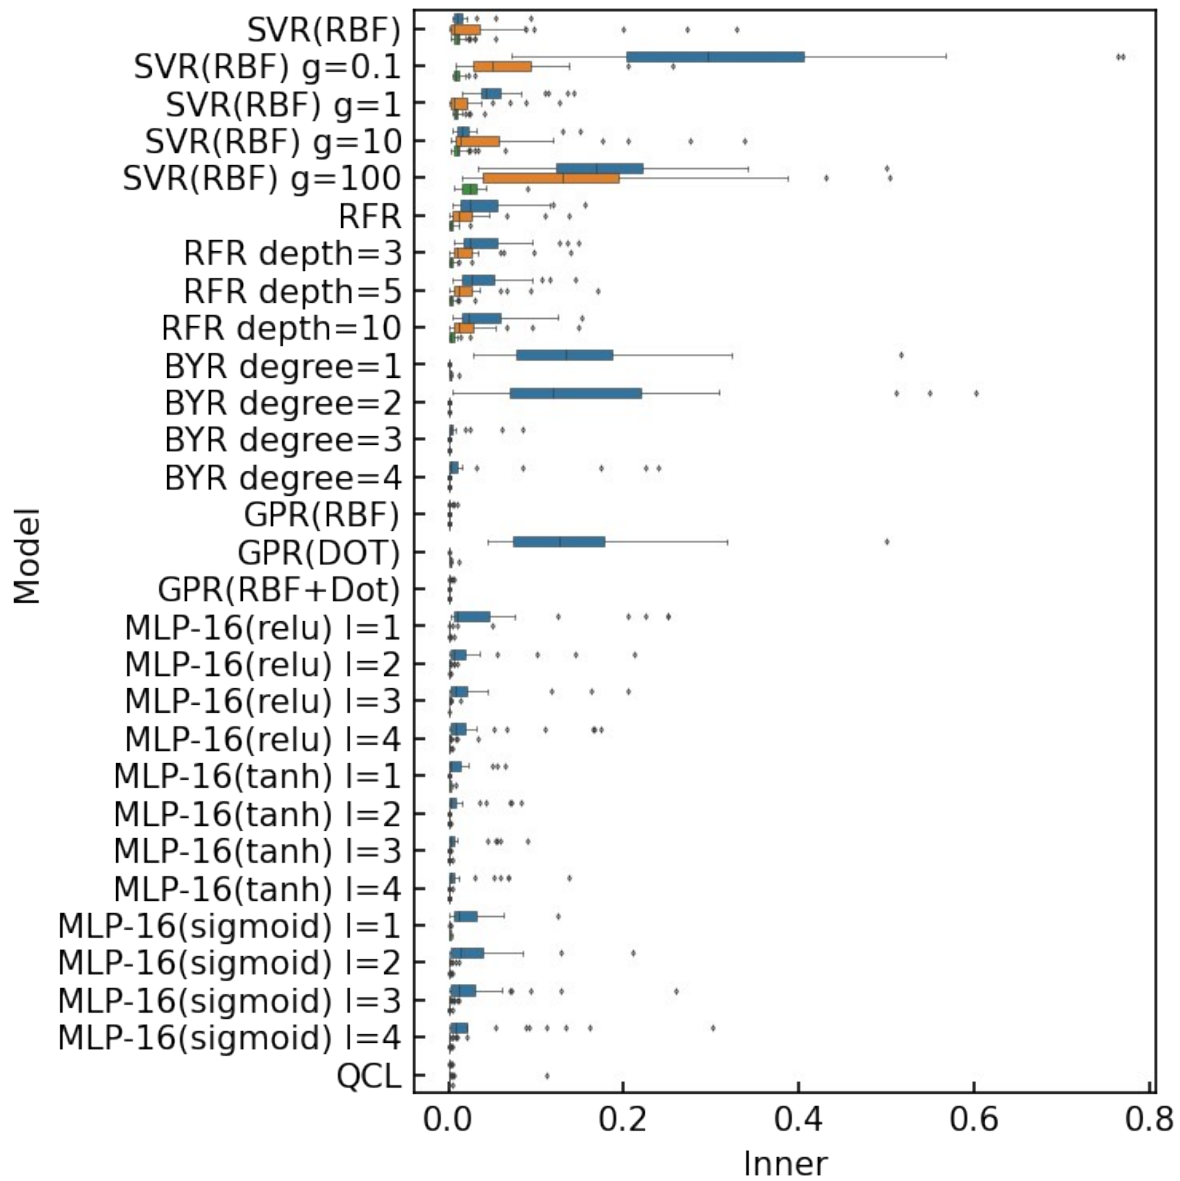

c)

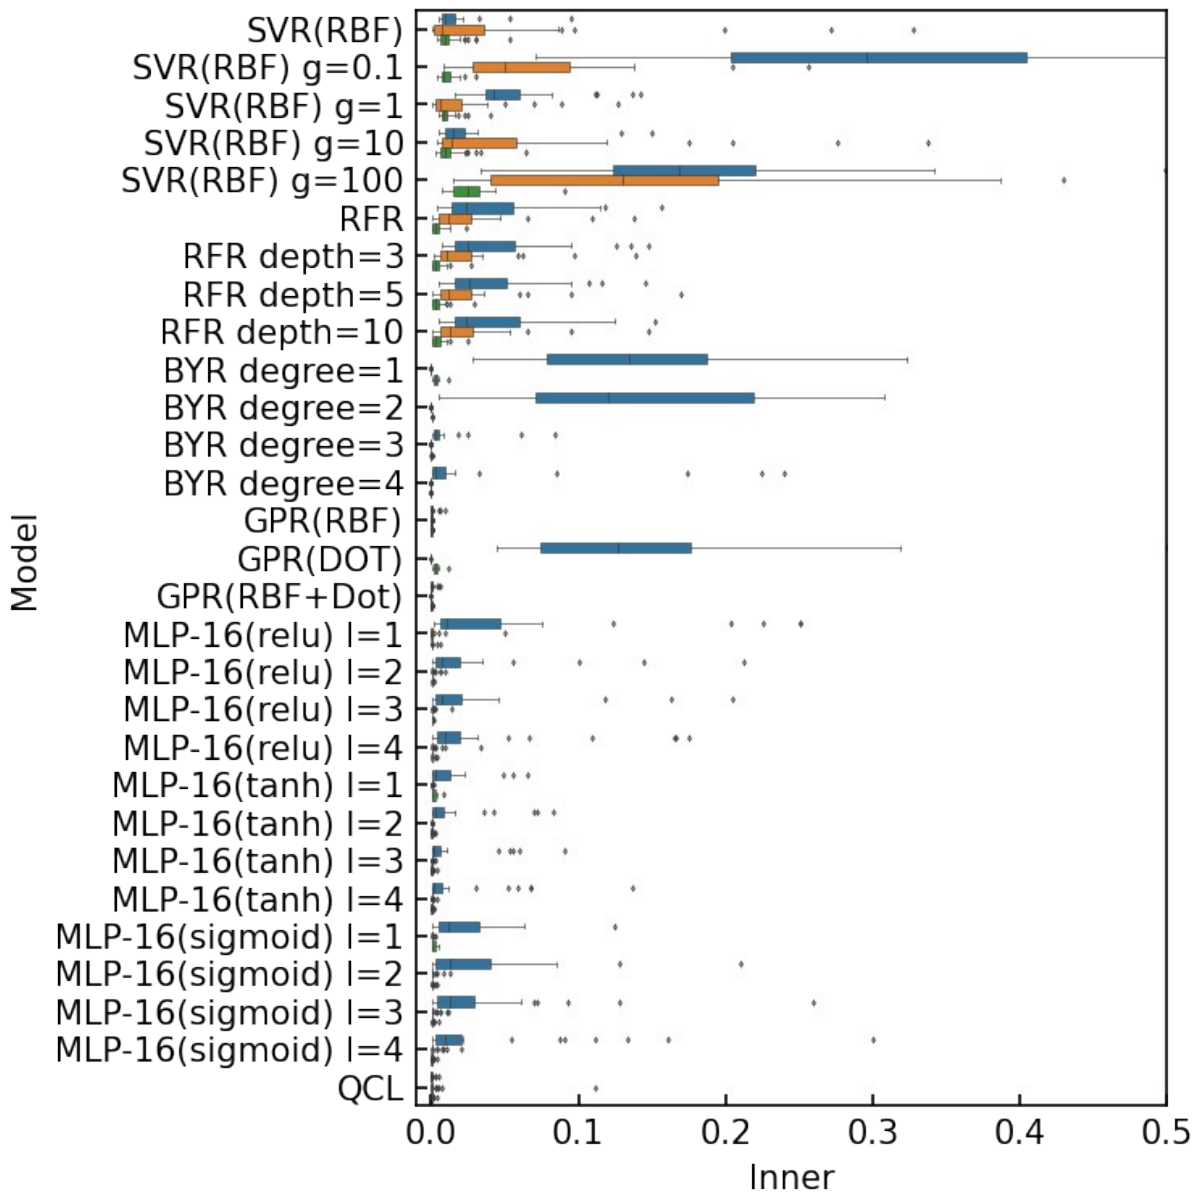

Figure S 4 Mean squared errors (MSEs) for the one-dimensional regression tasks. The random data preparation and regressions were repeated 30 times. a,b) Prediction errors for the testing datasets in the extrapolating regions and c,d) for interpolating regions. For clearer comparison, enlarged graphs are shown in Figures b and d) by setting the x-range of 0 to 0.5.

**Table S3** Average MSEs for the regression task in Figure S 4. Extra and inner represent the testing data in the extrapolating and interpolating regions, respectively. The “Total” column is the sum of Extra (all) and Inner (all), which are average MSEs for the regression tasks of linear, sin, and exponential curves.

| Model               | Extra (all) | Inner (all) | Total  | Extra (linear) | Inner (linear) | Extra (sin) | Inner (sin) | Extra (exp) | Inner (exp) |
|---------------------|-------------|-------------|--------|----------------|----------------|-------------|-------------|-------------|-------------|
| GPR(RBF+Dot)        | 0.0034      | 0.00018     | 0.0036 | 3.3e-11        | 1.2e-11        | 0.0096      | 0.00052     | 0.00069     | 2.3e-05     |
| GPR(RBF)            | 0.0053      | 0.00027     | 0.0056 | 0.00063        | 6.9e-05        | 0.014       | 0.0007      | 0.0011      | 4e-05       |
| QCL                 | 0.02        | 0.0018      | 0.022  | 0.039          | 0.0045         | 0.0052      | 0.00037     | 0.017       | 0.00043     |
| MLP-16(tanh) l=3    | 0.049       | 0.0042      | 0.054  | 0.002          | 0.00027        | 0.14        | 0.012       | 0.0054      | 0.00029     |
| MLP-16(tanh) l=1    | 0.054       | 0.004       | 0.058  | 0.0011         | 0.00012        | 0.15        | 0.011       | 0.011       | 0.0013      |
| MLP-16(tanh) l=4    | 0.053       | 0.0054      | 0.059  | 0.002          | 0.00031        | 0.15        | 0.016       | 0.0046      | 0.00021     |
| MLP-16(tanh) l=2    | 0.054       | 0.0044      | 0.059  | 0.00097        | 9.3e-05        | 0.16        | 0.013       | 0.0059      | 0.0003      |
| BYR degree=3        | 0.08        | 0.0029      | 0.083  | 8.3e-11        | 7.5e-12        | 0.24        | 0.0086      | 0.0001      | 3.3e-06     |
| MLP-16(sigmoid) l=1 | 0.11        | 0.0079      | 0.12   | 0.0027         | 0.0003         | 0.32        | 0.022       | 0.012       | 0.0013      |
| MLP-16(sigmoid) l=2 | 0.13        | 0.011       | 0.14   | 0.011          | 0.0013         | 0.37        | 0.03        | 0.0056      | 0.00042     |
| MLP-16(sigmoid) l=3 | 0.13        | 0.011       | 0.14   | 0.015          | 0.0017         | 0.37        | 0.032       | 0.0071      | 0.0004      |
| MLP-16(sigmoid) l=4 | 0.13        | 0.013       | 0.15   | 0.018          | 0.0021         | 0.37        | 0.037       | 0.0075      | 0.00038     |
| MLP-16(relu) l=3    | 0.16        | 0.009       | 0.17   | 0.012          | 0.00095        | 0.45        | 0.026       | 0.0048      | 0.00037     |
| MLP-16(relu) l=2    | 0.16        | 0.0088      | 0.17   | 0.0084         | 0.001          | 0.46        | 0.025       | 0.0031      | 0.00026     |
| MLP-16(relu) l=4    | 0.16        | 0.011       | 0.17   | 0.014          | 0.0021         | 0.45        | 0.031       | 0.0052      | 0.0006      |
| SVR(RBF)            | 0.15        | 0.024       | 0.18   | 0.31           | 0.044          | 0.062       | 0.015       | 0.078       | 0.013       |
| RFR                 | 0.17        | 0.022       | 0.2    | 0.13           | 0.023          | 0.35        | 0.039       | 0.038       | 0.0043      |
| RFR depth=3         | 0.18        | 0.023       | 0.2    | 0.13           | 0.023          | 0.36        | 0.041       | 0.038       | 0.0043      |
| RFR depth=10        | 0.18        | 0.023       | 0.2    | 0.13           | 0.024          | 0.36        | 0.041       | 0.038       | 0.0043      |
| RFR depth=5         | 0.18        | 0.023       | 0.2    | 0.13           | 0.024          | 0.36        | 0.04        | 0.038       | 0.0043      |
| SVR(RBF) g=10       | 0.18        | 0.031       | 0.21   | 0.42           | 0.056          | 0.032       | 0.024       | 0.093       | 0.013       |
| SVR(RBF) g=1        | 0.2         | 0.028       | 0.23   | 0.15           | 0.019          | 0.39        | 0.055       | 0.058       | 0.011       |
| MLP-16(relu) l=1    | 0.25        | 0.018       | 0.27   | 0.017          | 0.0024         | 0.72        | 0.05        | 0.0066      | 0.00048     |
| BYR degree=4        | 0.28        | 0.0093      | 0.29   | 8.2e-08        | 1.1e-08        | 0.84        | 0.028       | 1.7e-05     | 2.6e-07     |
| SVR(RBF) g=0.1      | 0.17        | 0.13        | 0.3    | 0.19           | 0.067          | 0.26        | 0.33        | 0.048       | 0.01        |
| SVR(RBF) g=100      | 0.31        | 0.12        | 0.43   | 0.73           | 0.15           | 0.071       | 0.18        | 0.14        | 0.026       |
| GPR(DOT)            | 0.43        | 0.048       | 0.48   | 2.2e-11        | 7.6e-12        | 1.3         | 0.14        | 0.022       | 0.0028      |
| BYR degree=1        | 0.46        | 0.049       | 0.5    | 2e-14          | 7.8e-15        | 1.3         | 0.14        | 0.022       | 0.0028      |
| BYR degree=2        | 0.77        | 0.057       | 0.83   | 2e-12          | 4.3e-13        | 2.3         | 0.17        | 0.0016      | 0.00011     |



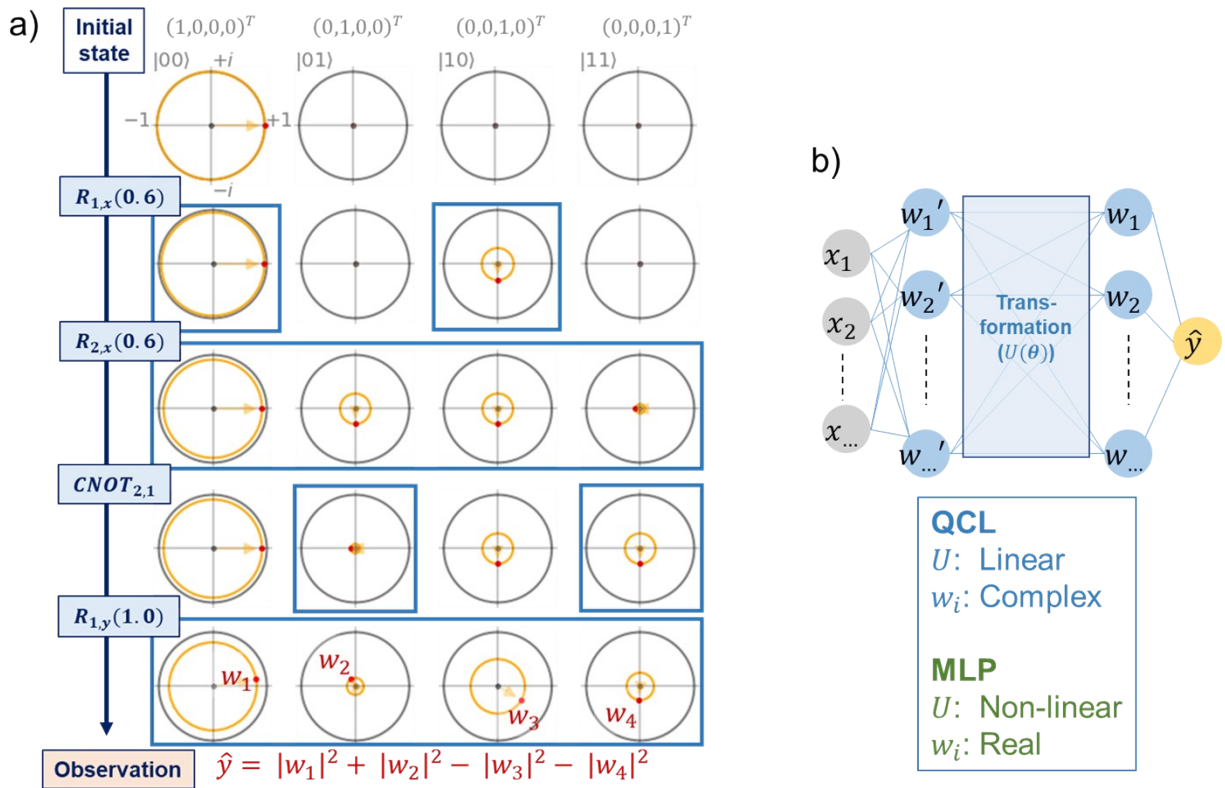

Figure S 5 a) Visualized state vector for an example circuit of  $U(\theta)V(x) = R_{1,y}(\theta) \cdot CNOT_{1,2} \cdot R_{2,x}(x) \cdot R_{1,x}(x)$  ( $\theta = 1.0, x = 0.6$ ). Coordinate  $w_i$  against four bases  $|00\rangle = (1,0,0,0)^T, \dots, |11\rangle = (0,0,0,1)^T$  are plotted as red points on complex planes. Changes of  $w_i$  by gates are marked by blue squares. b) Model design of QCL and MLP.

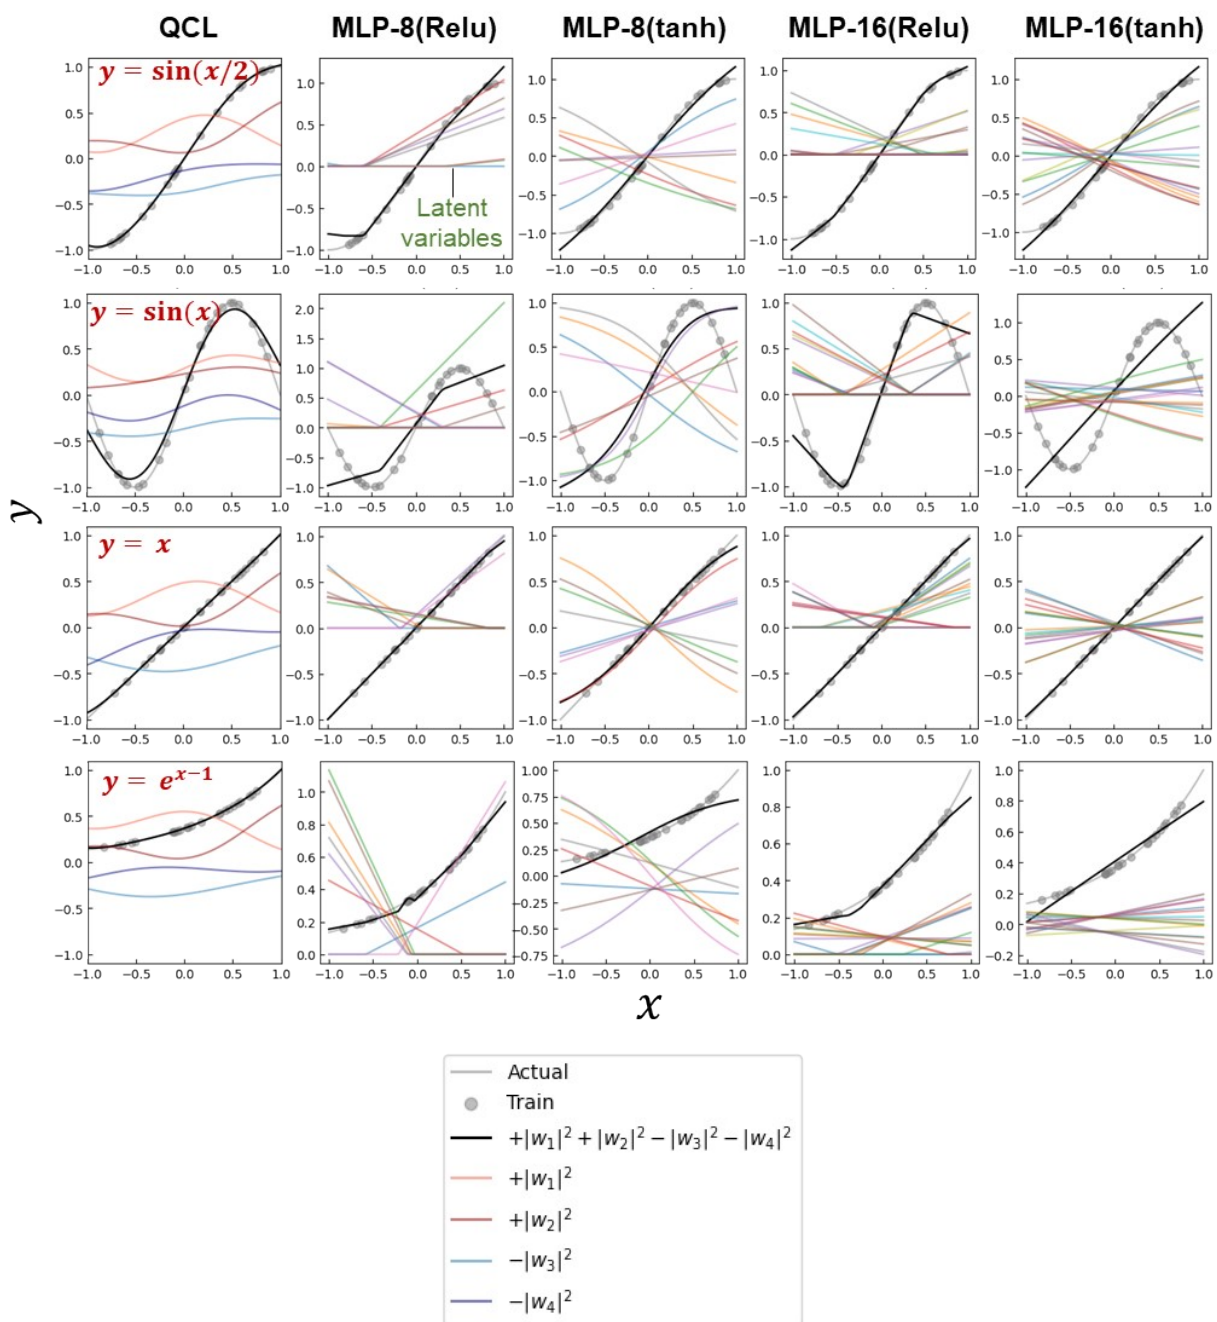

Figure S 6 Visualization of latent variables for the QCL and MLP models. Gray plots and lines show answer data, black lines correspond to final predictions, and other colored curves are latent variables. The expression of “MLP-8(ReLU)” represents that an 8-dimensional hidden layer and a ReLU activation function were selected as hyperparameters. Related data is shown in Figure 5.

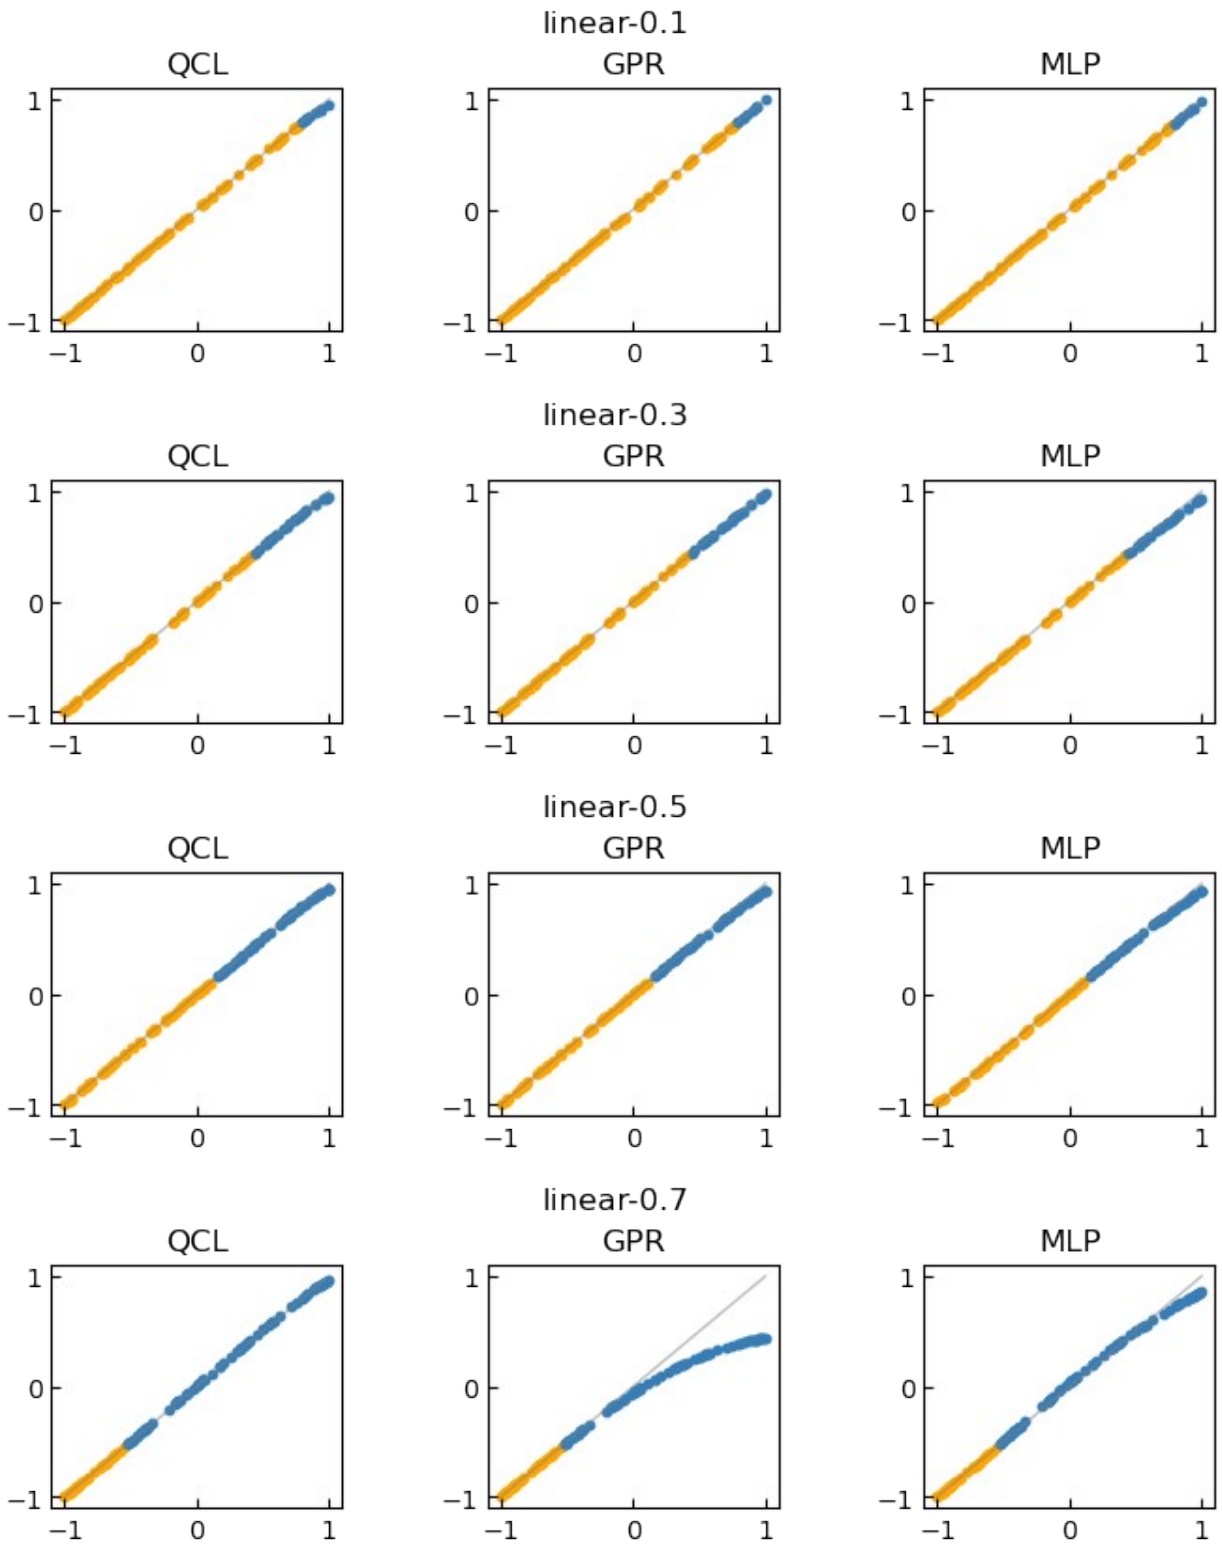

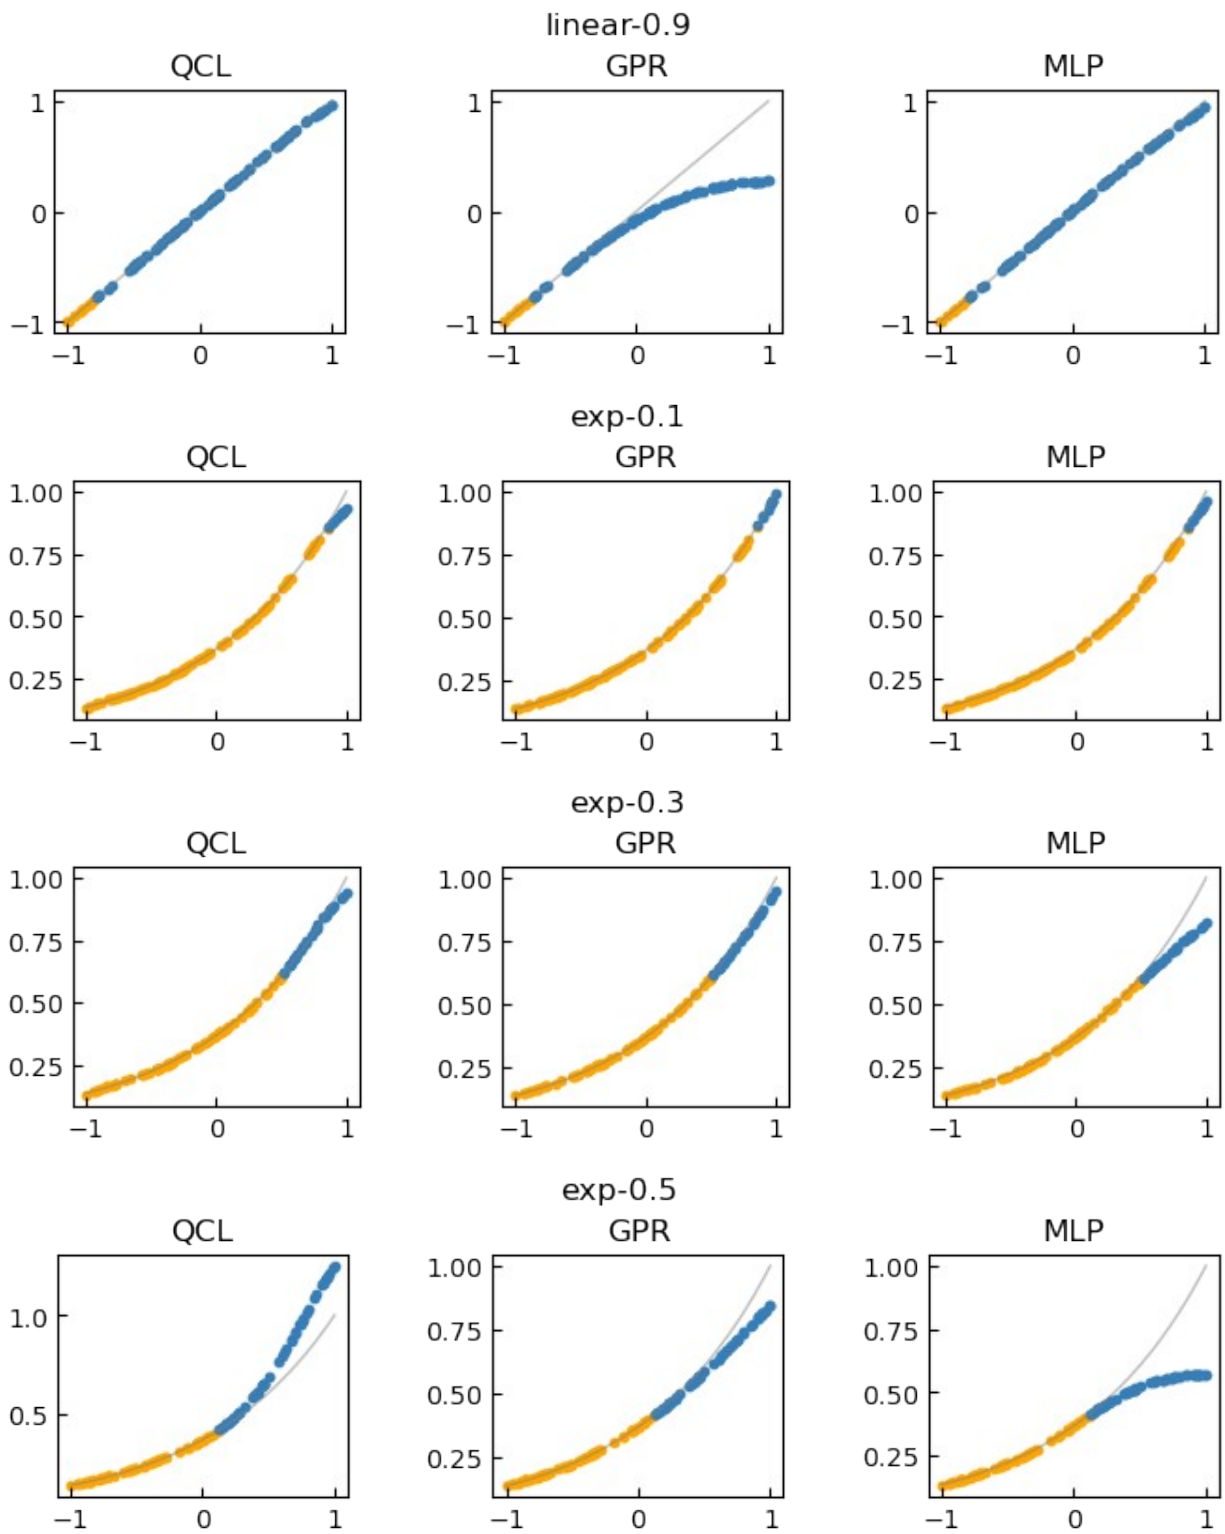

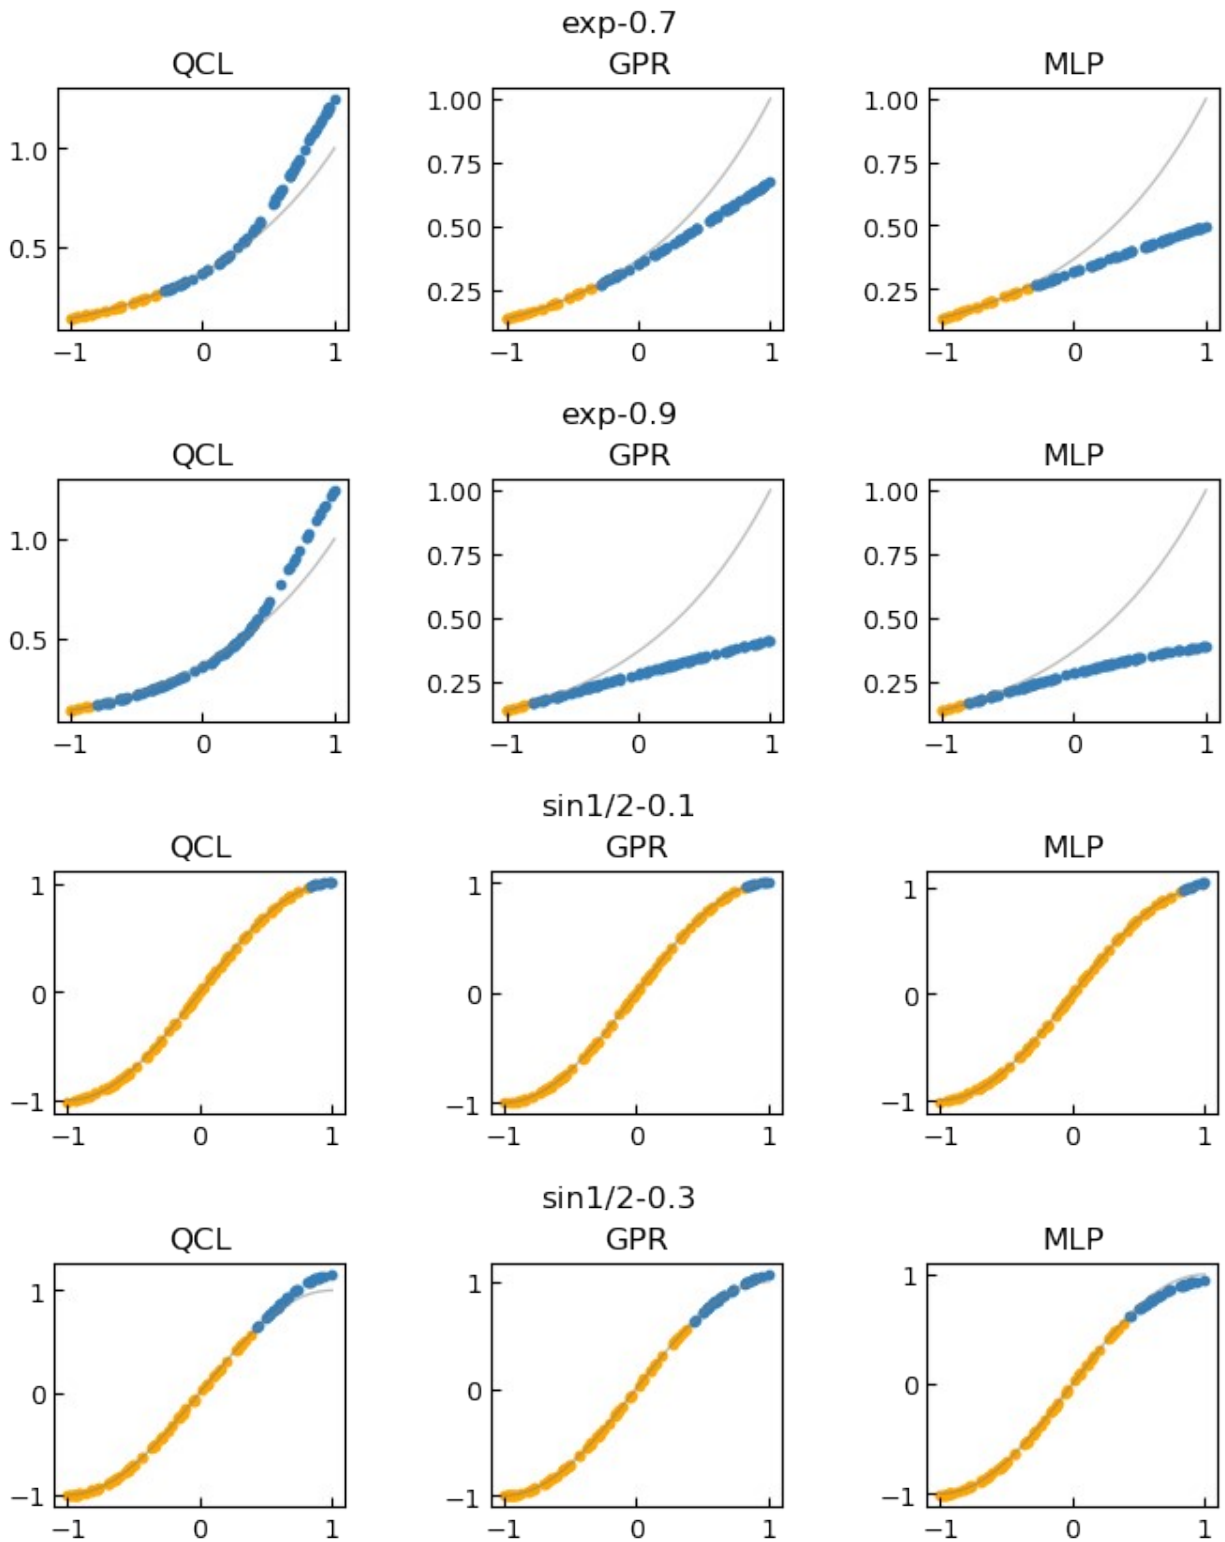

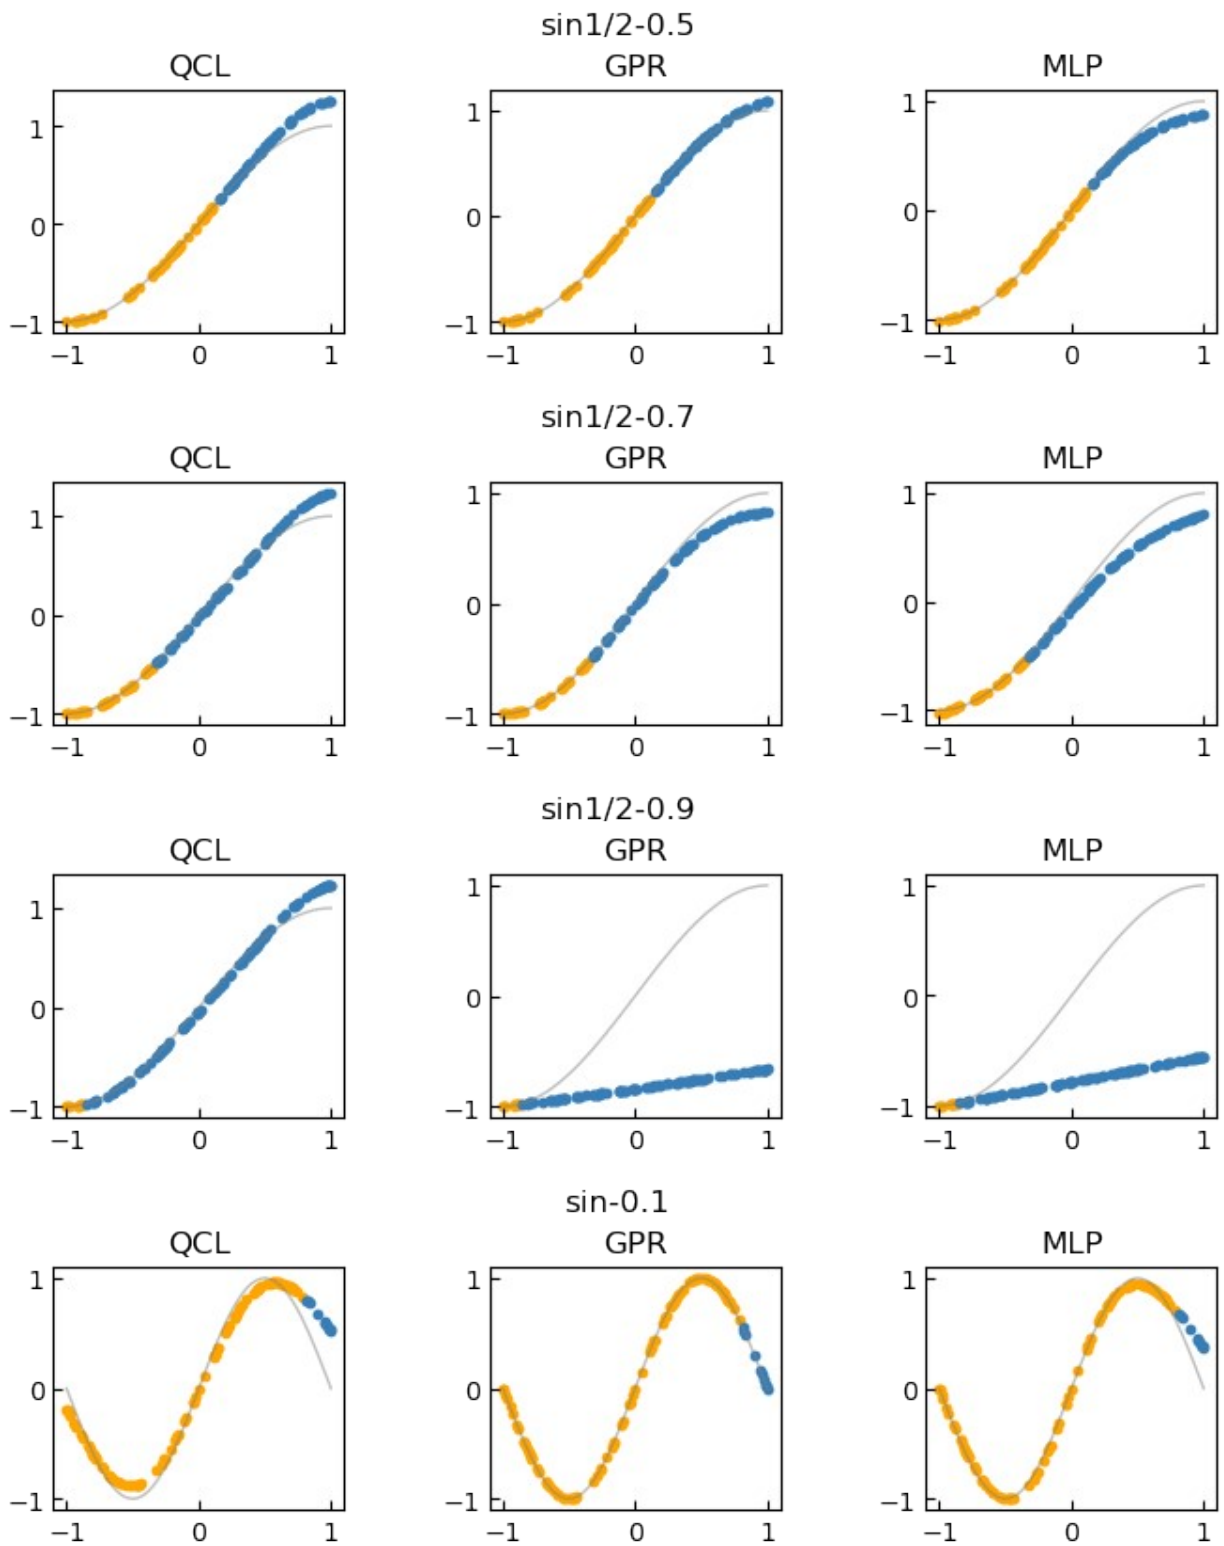

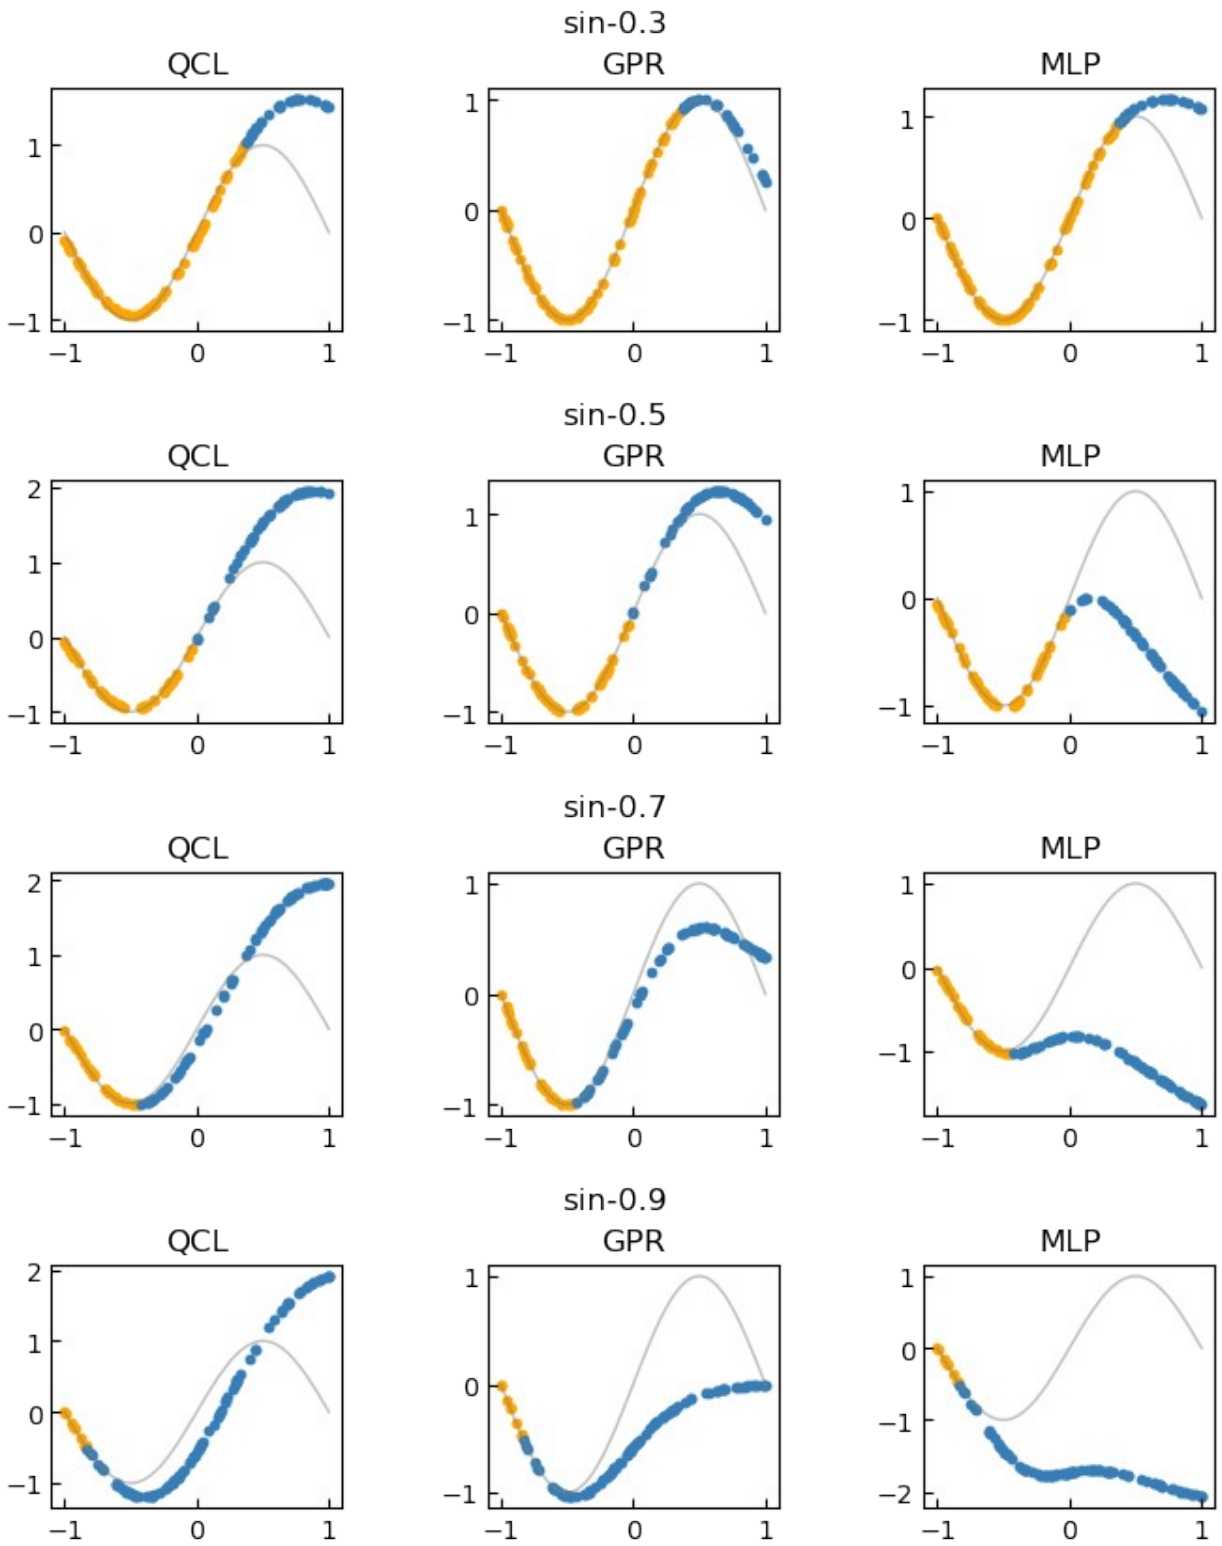

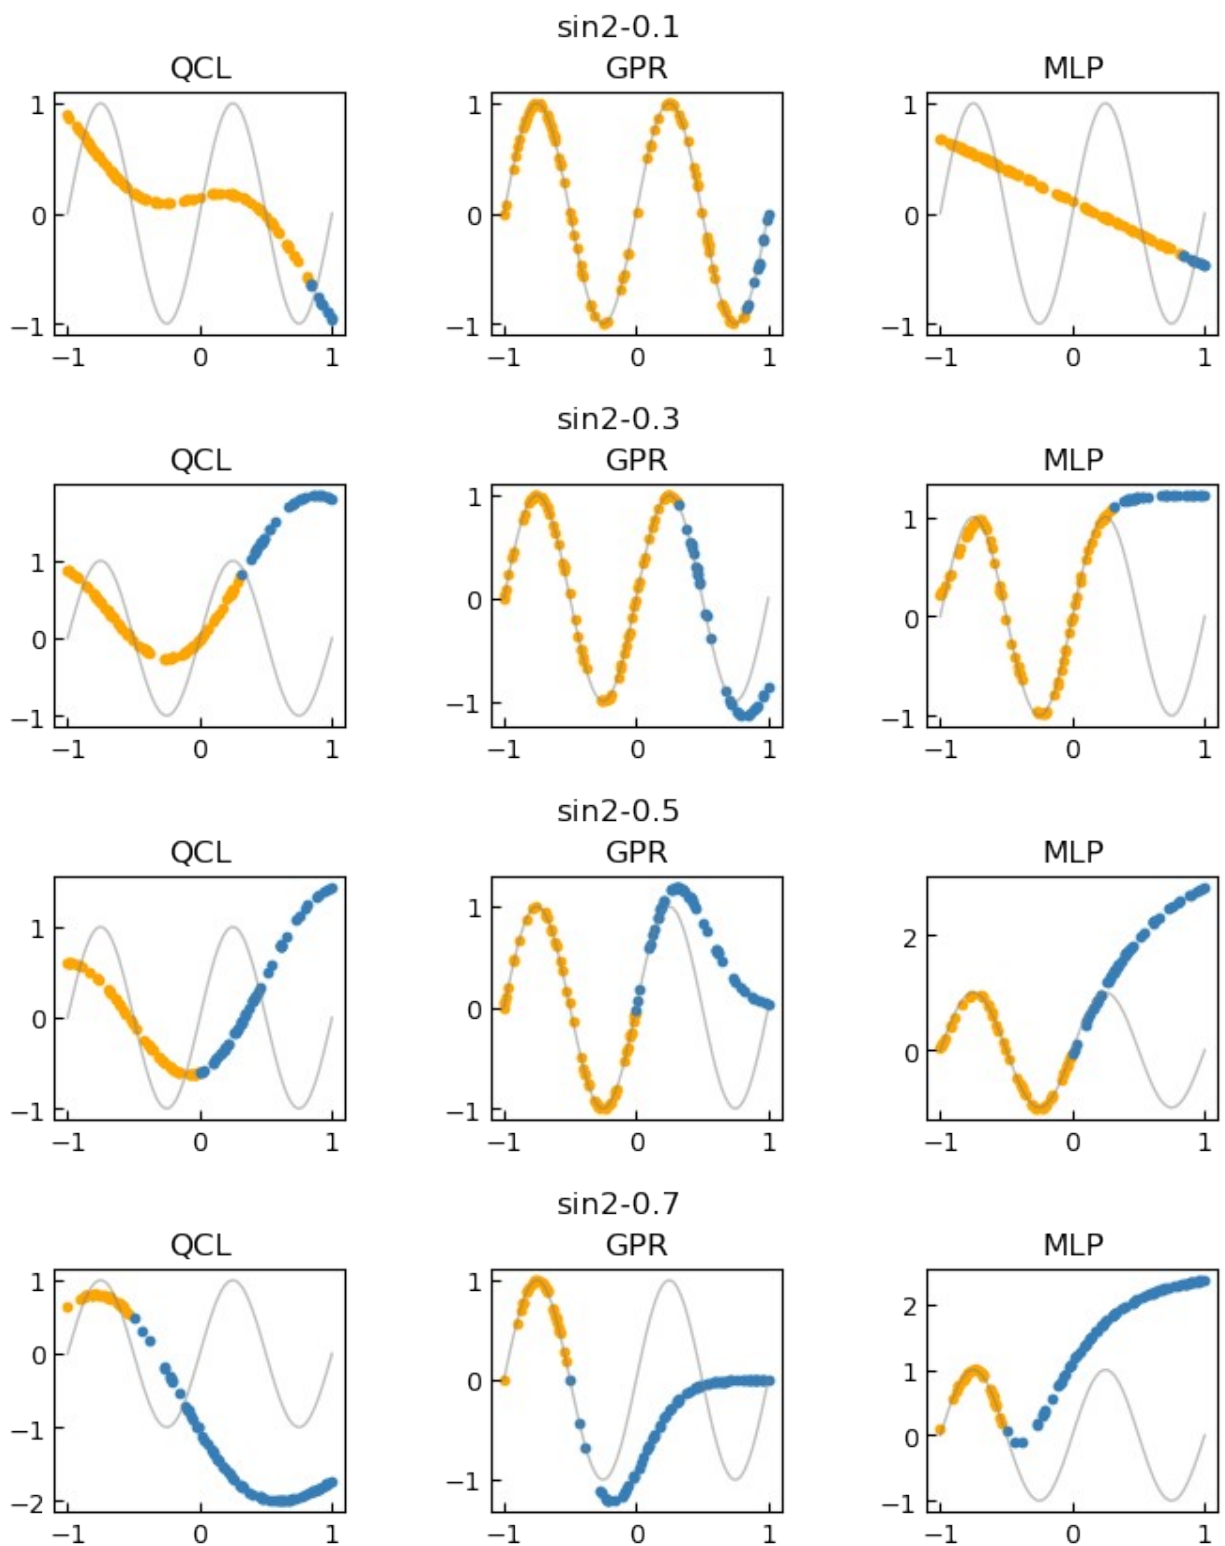



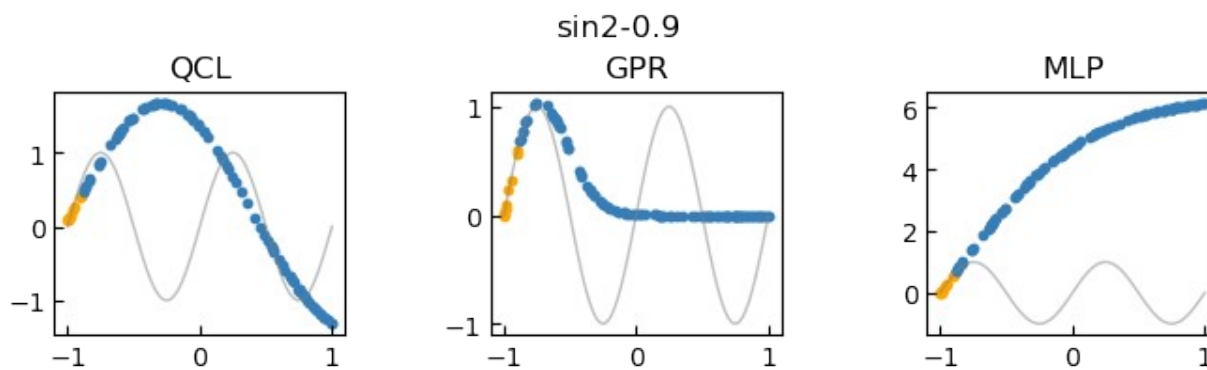

Figure S 7 Extrapolating predictions of linear, exponential, and sinusoidal functions by QCL, GPR (RBF), and MLP-8. Random 100 points were generated according to the original functions. Extrapolating 10, 30, 50, 70, or 90% of the data were selected as testing sets, and the rest were training. The expression of, e.g., “sin2-0.9” indicates that a  $\sin 2x$  function was fitted with the 90% extrapolating testing data.

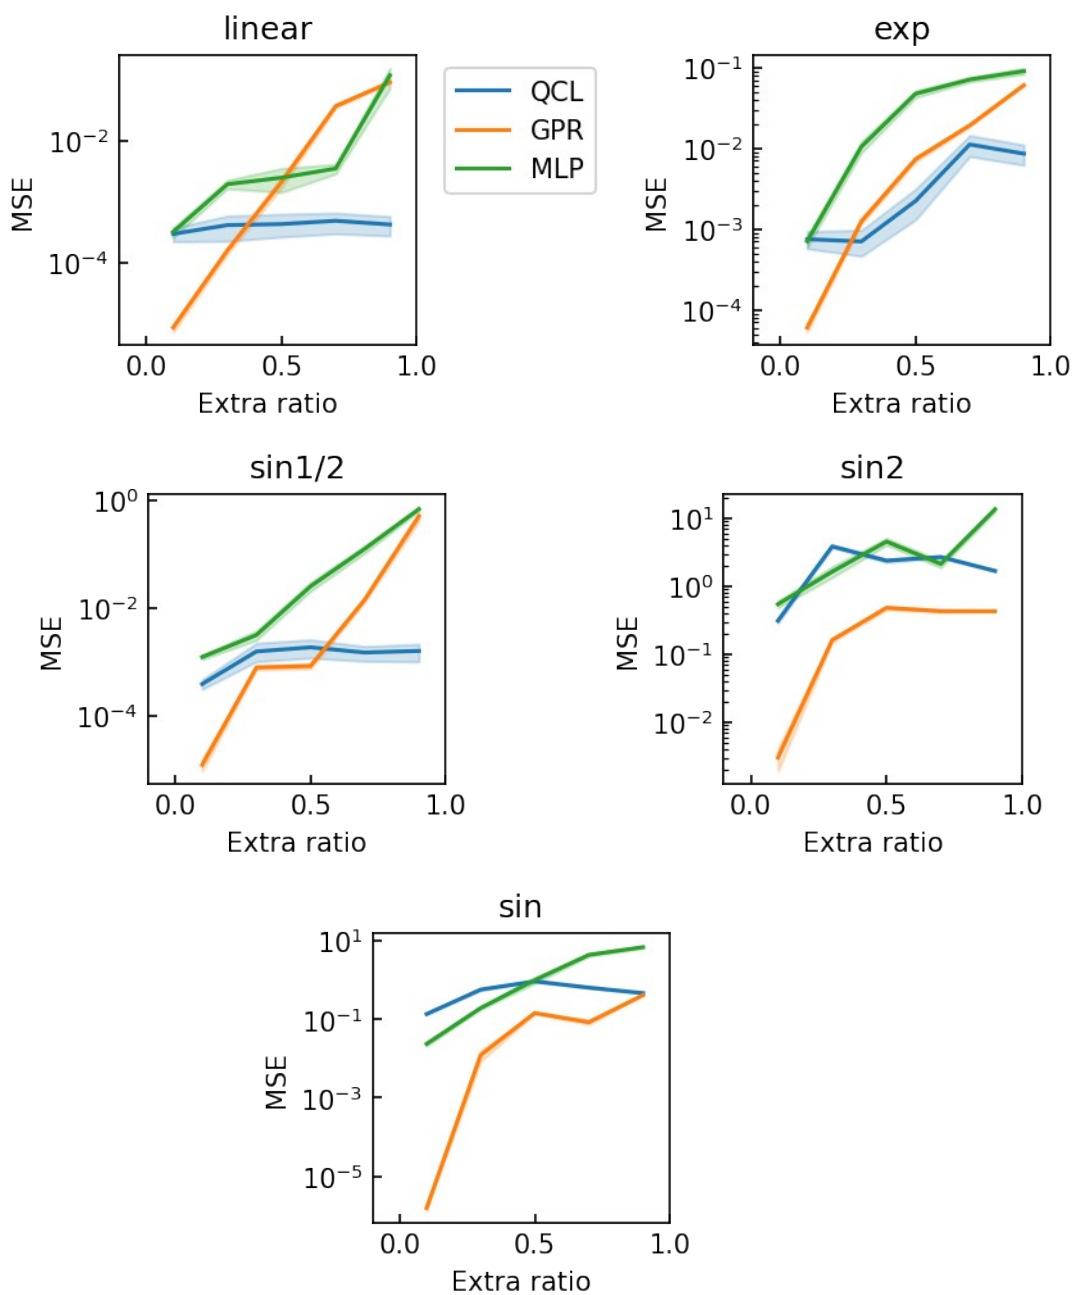

Figure S 8 Statistical extrapolating performances for Figure S 7. The random dataset preparation and fitting were repeated 30 times. Transparent regions show standard errors with 68% confidence intervals.

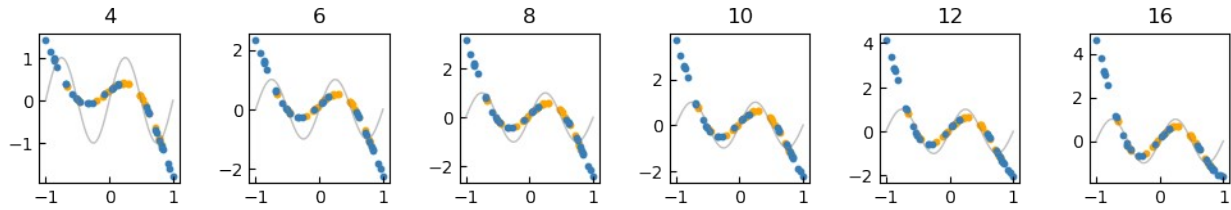

Figure S 9 Regression of  $\sin^{c/2}(2x)$  by normal QCL models with different prefactors for observable ( $\hat{y} \mapsto c\hat{y}$ ,  $c = 4, 6, 8, 10, 12$ , or  $16$ ). The increase of the constant enabled the better fitting of  $\sin^{c/2}(2x)$  in the inner region. However, prediction errors in the extrapolating areas became much larger.

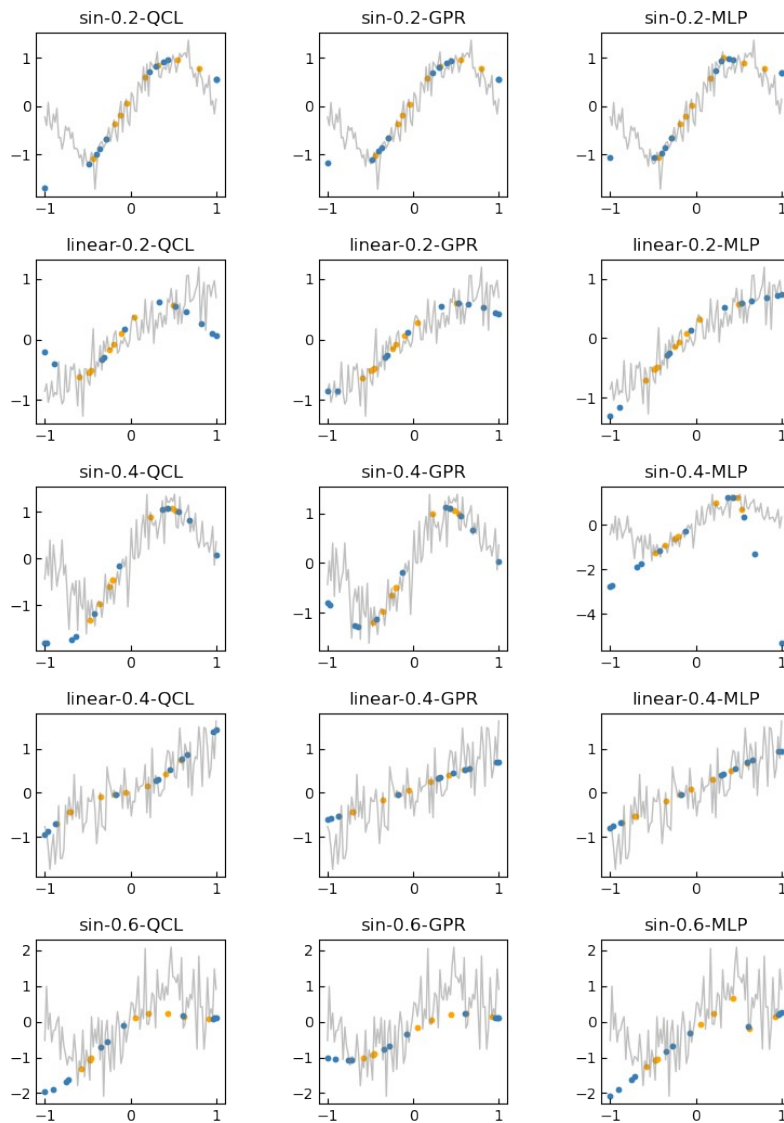

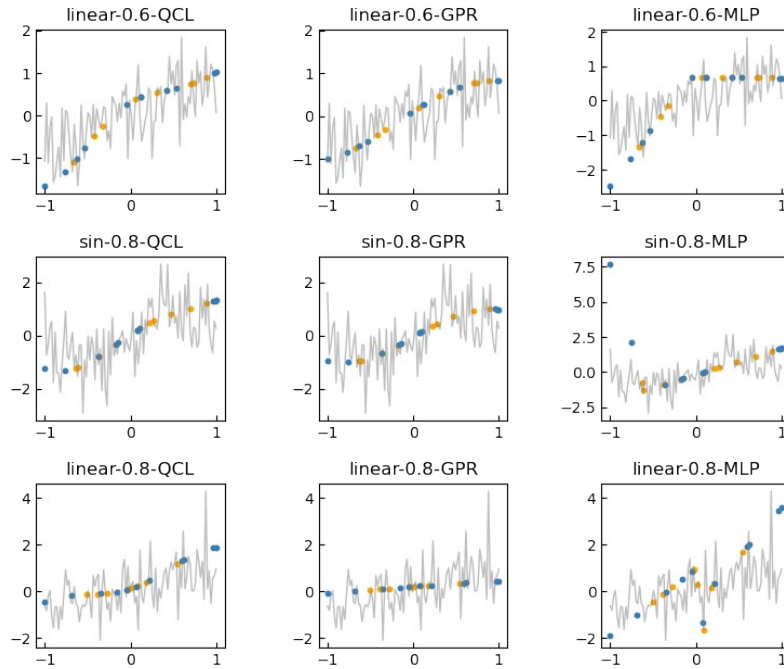

Figure S 10 Regression of noised  $\sin^z(x)$  or  $x$  by normal QCL, GPR, MLP-8 models. An expression of  $\sin$ - $z$ -QCL means that Gaussian random noises were added to a sinusoidal curve with a scaling factor of  $z$ .

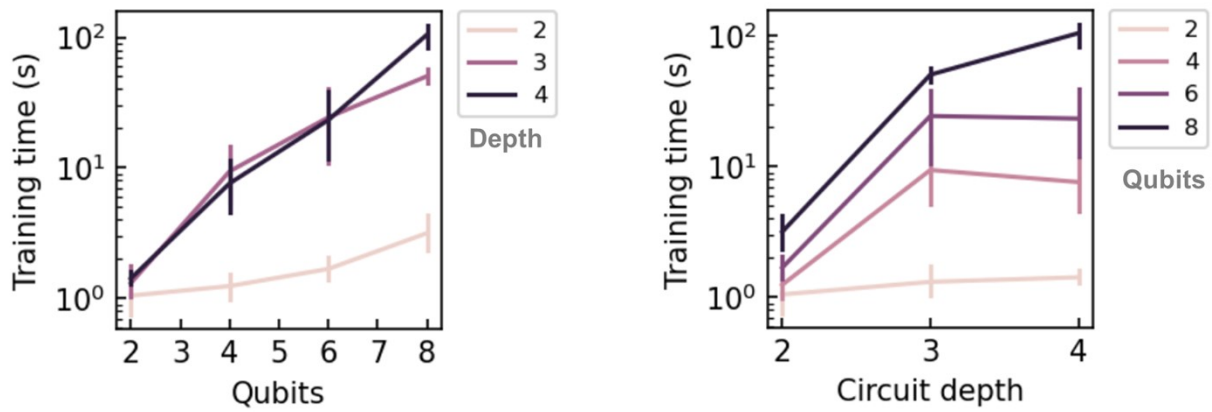

Figure S 11 Training time of QCL model (configuration shown in Figure 3b). The number of qubits  $n$  and circuit depth  $m$  were changed to train random 50 records of  $y = \sin(\frac{\pi}{4}x)$ . Predictions were done by calculating from state vectors and repeated five times for each condition. Error bars indicate 95% confidence intervals assuming Gaussian distribution.

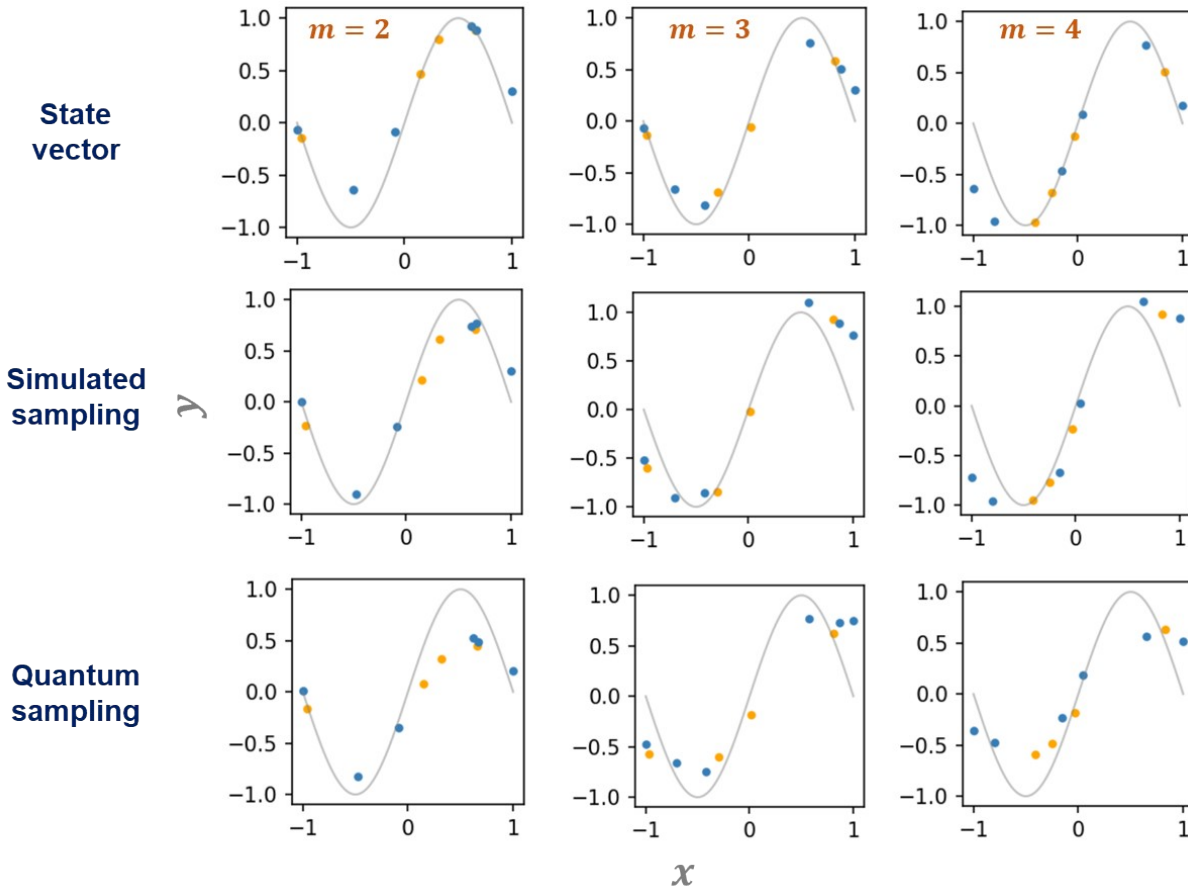

Figure S 12 Predicting the function of  $y = \sin(x)$  by an actual quantum computer (IBM Quantum) with  $m = 2, 3, \text{ or } 4$ . Models were trained using the output of state vectors. Then, simulated or actual quantum computations were conducted to predict the same data from sampling results (Eq 7). For one record, sampling was done 1000 times. The accuracy of simulated sampling was worse than the state vector due to the randomness. Worse results of quantum sampling than simulation meant that noises during quantum computing affected the predictions.

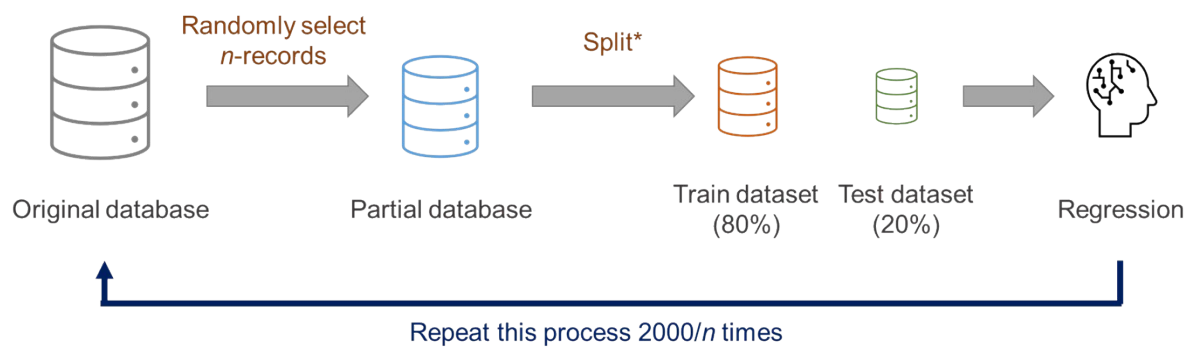

**\*Split process**

Interpolating task: Randomly Select 20% records for testing.

Extrapolating task: Select 20% of the top  $y$  records for testing.

Figure S 13 Dataset preparation and regression steps for the molecular property prediction task. The dataset size of  $n$  was set to be 8, 16, 32, 64, 128, 256, or 512.

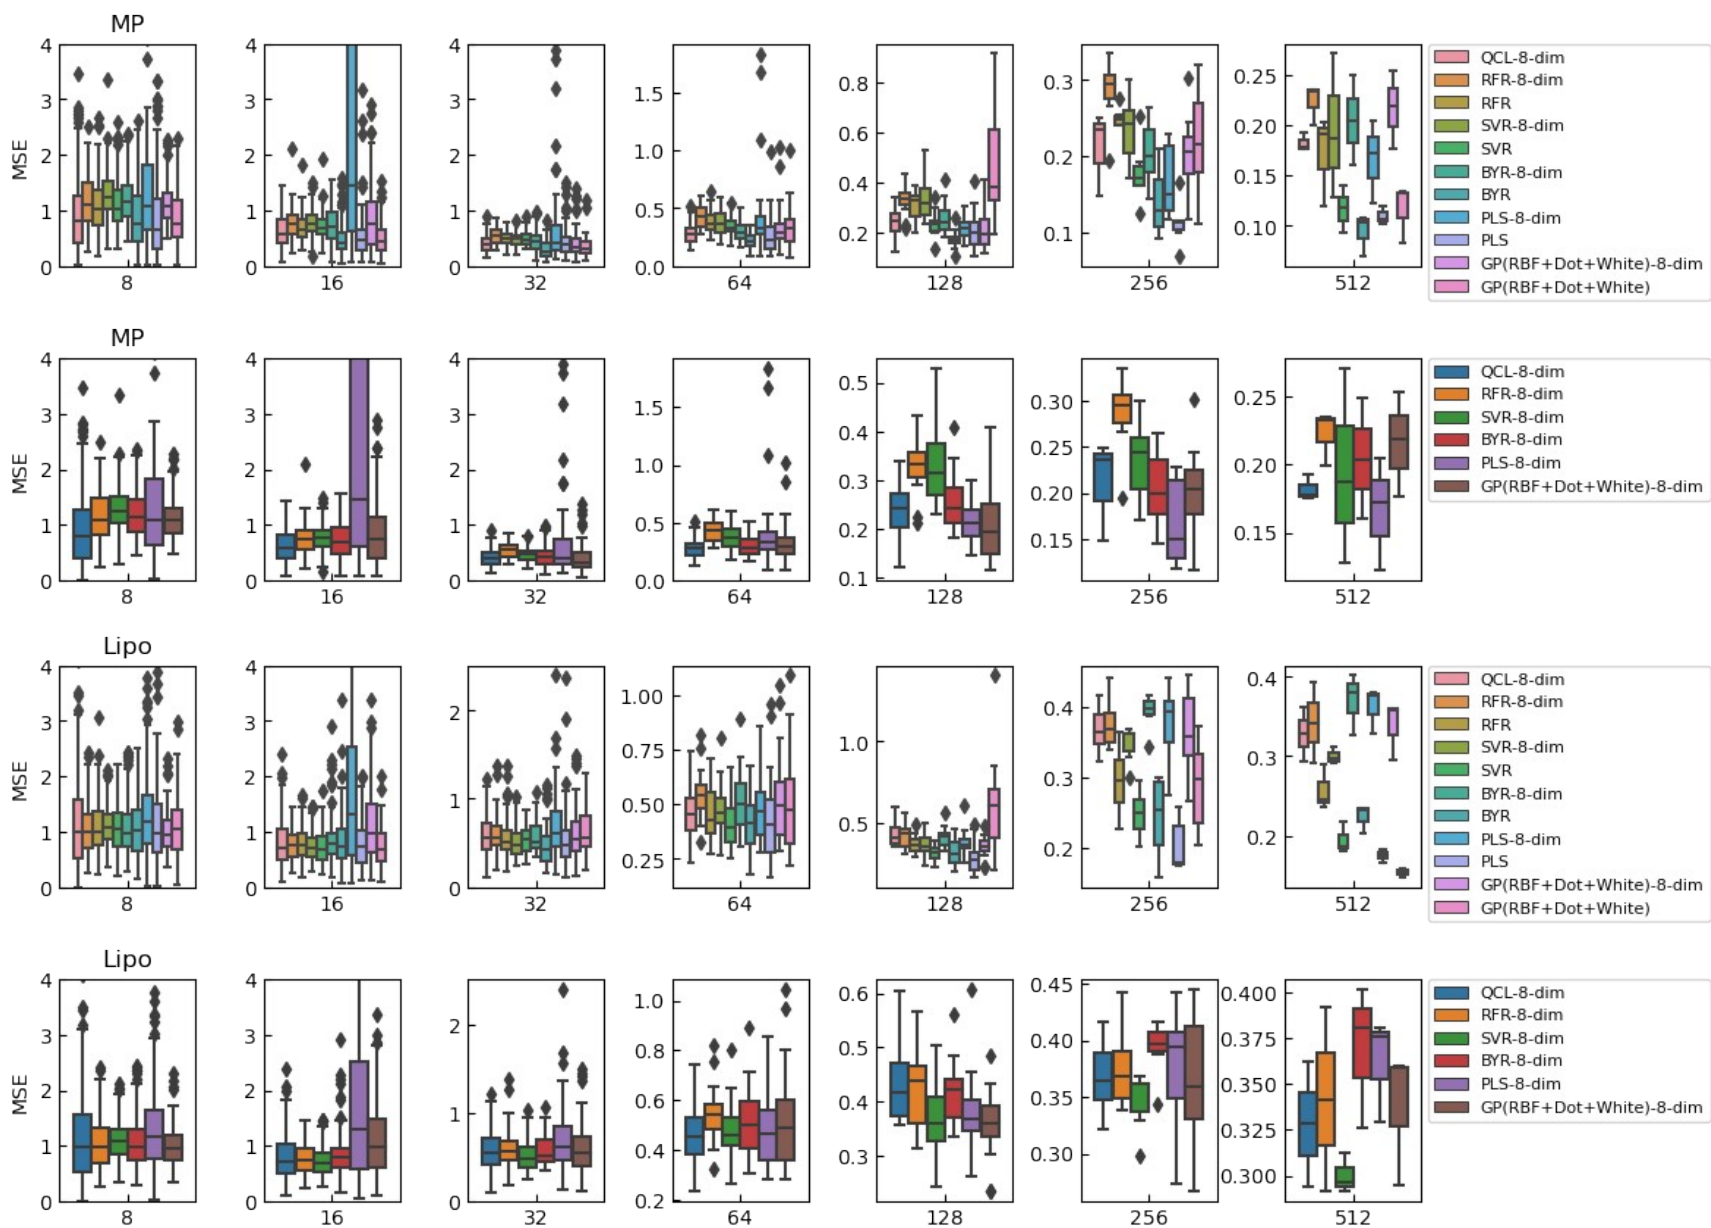



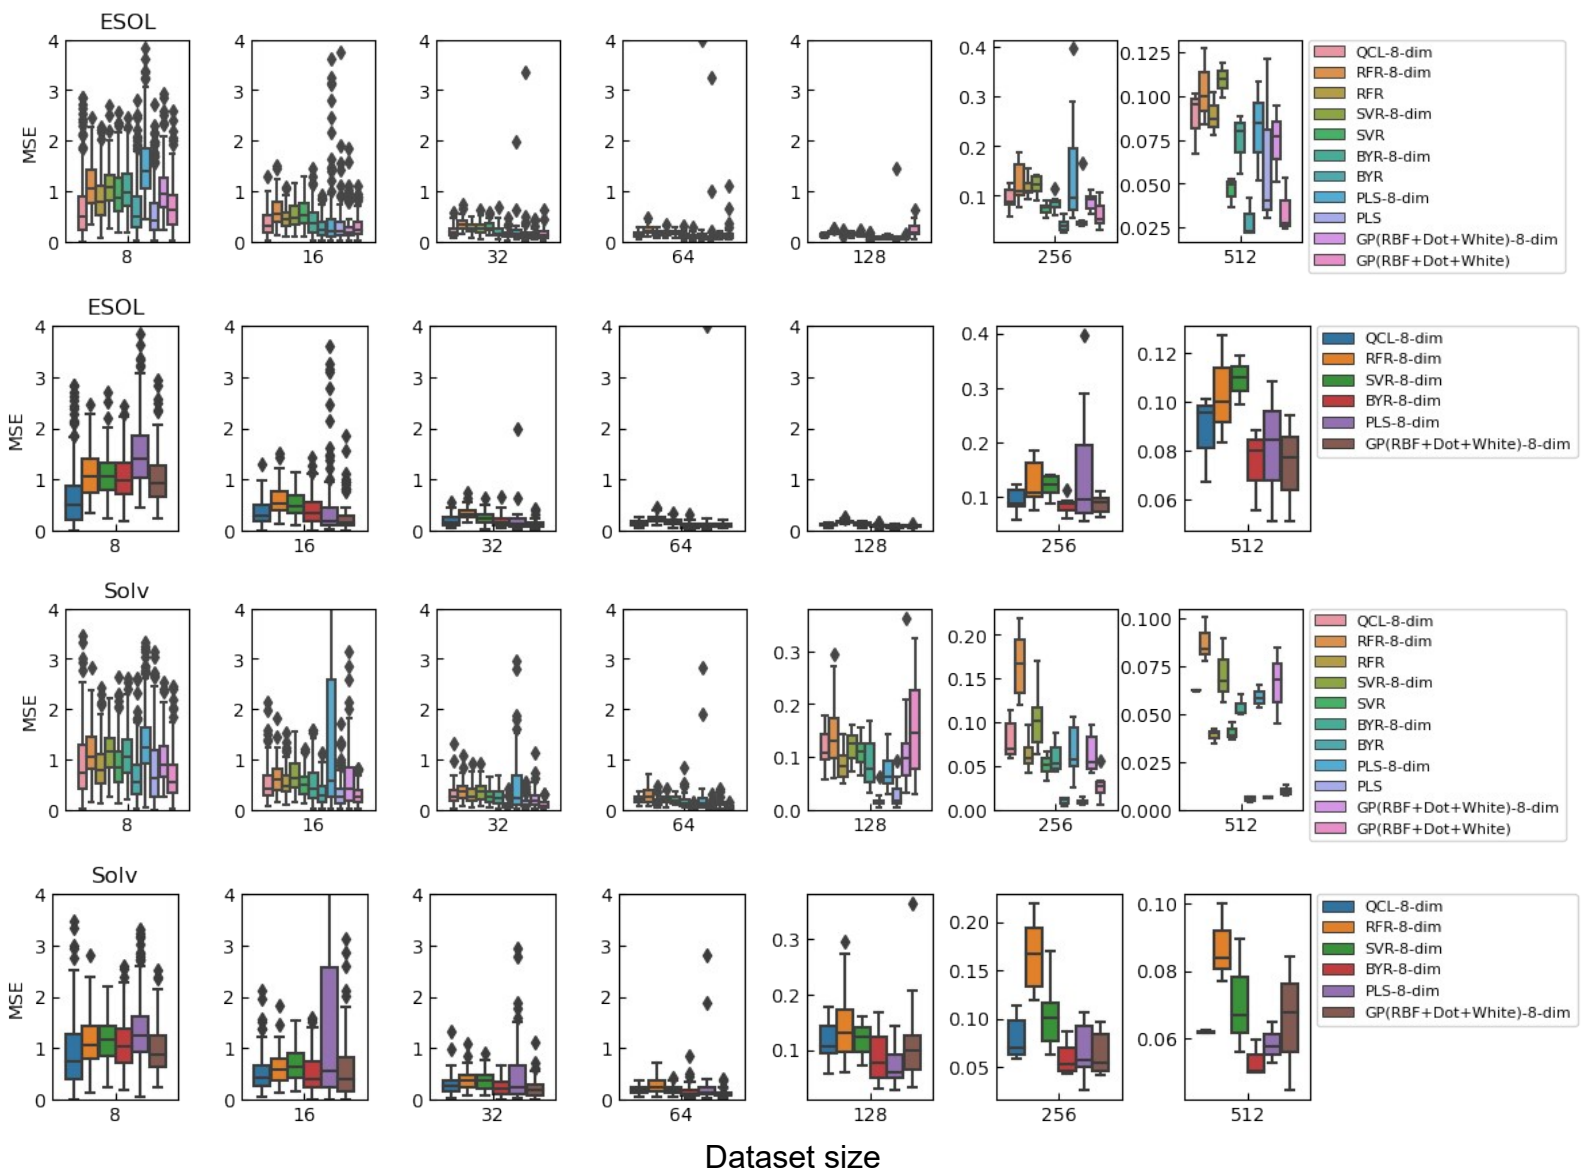

a)

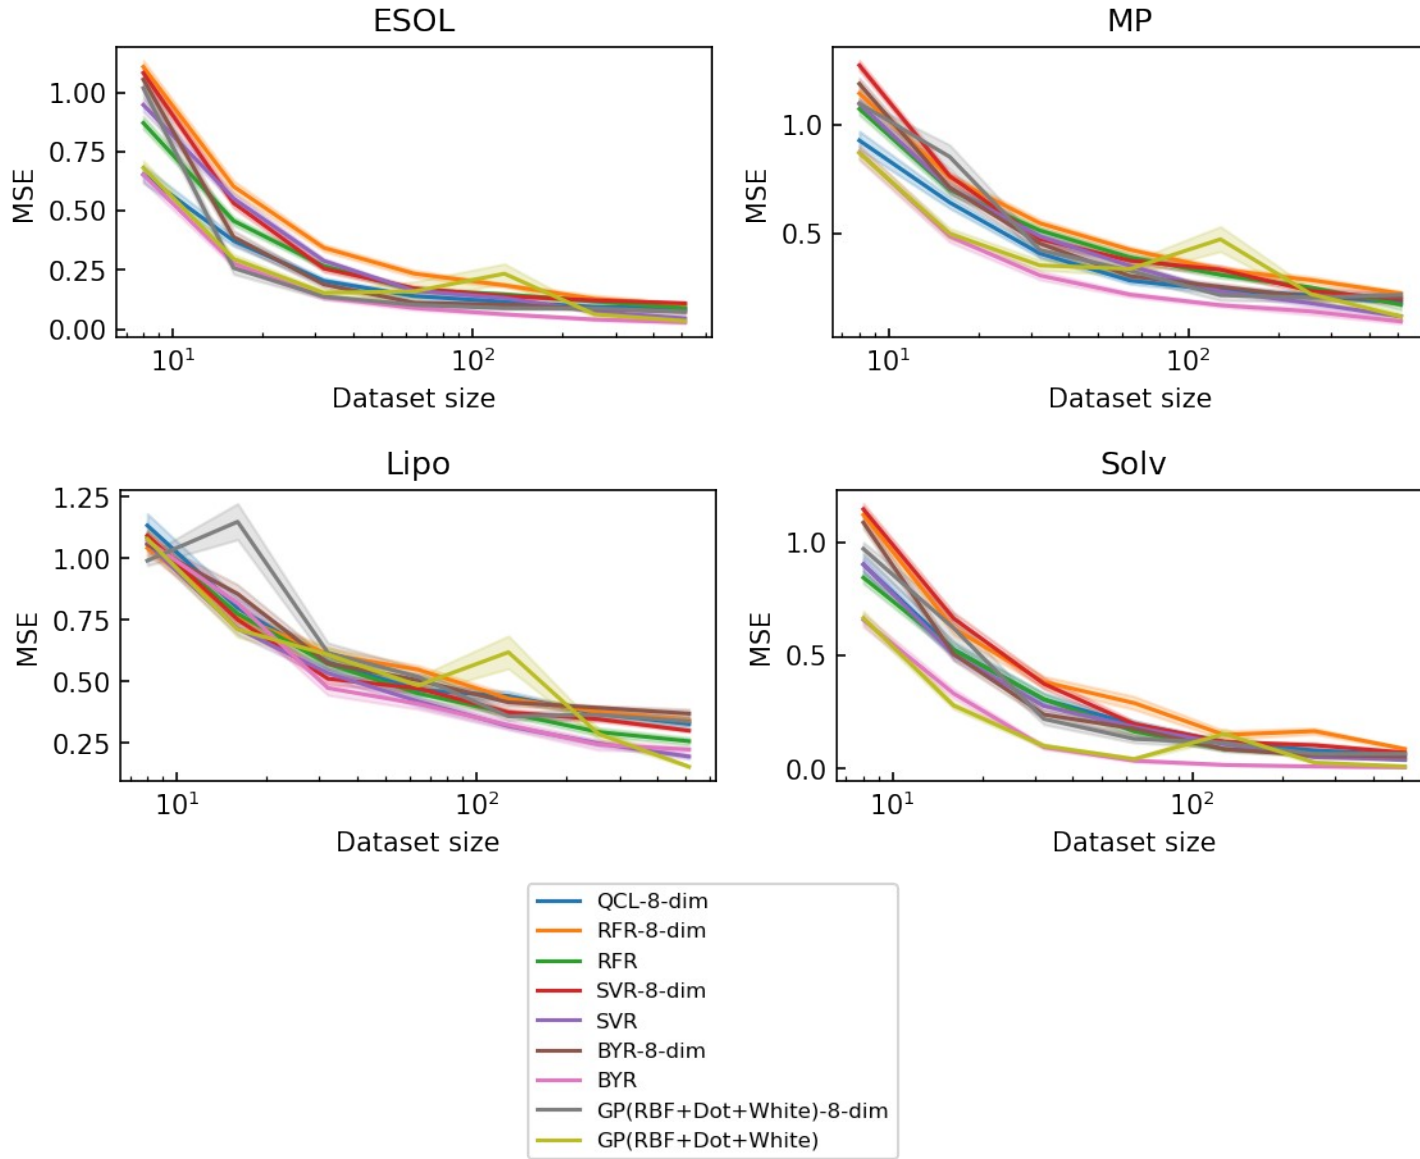

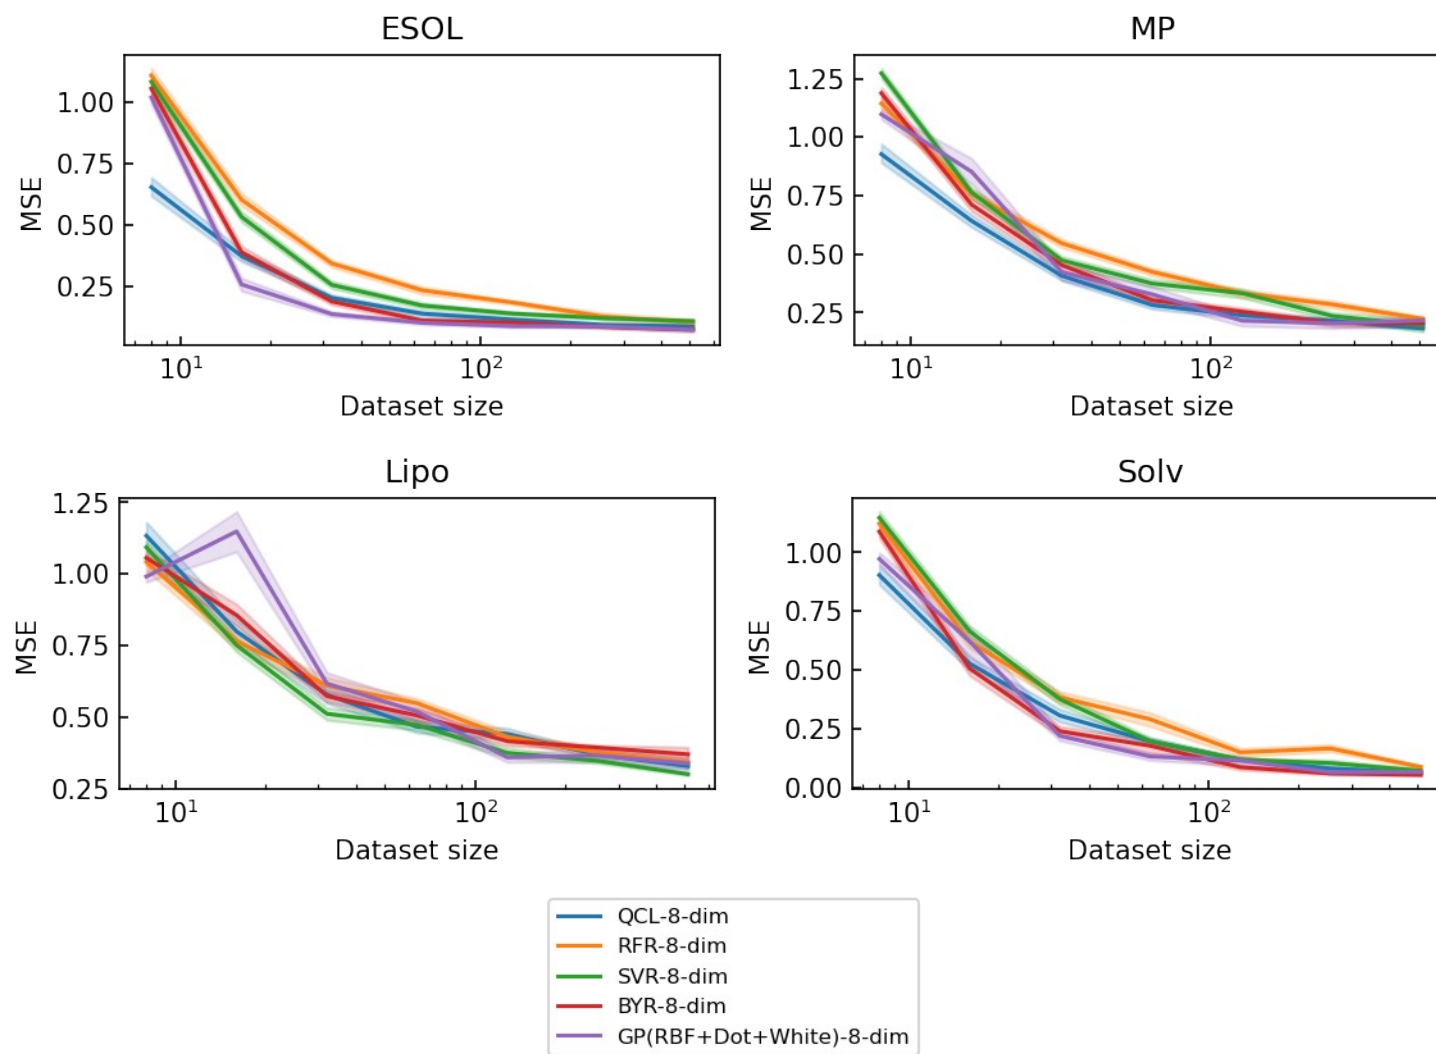

b)

Figure S 14 Regression results for the extrapolating tasks, with lipophilicity (Lipo), hydration free energy of small molecules in water (Solv), log solubility in water (ESOL), and melting point (MP) datasets. a) Box plots. b) Line plots with standard errors with 68%

confidence intervals. In the legends, “8-dim” means that the explanatory variables were compressed from about 200- to 8-dimensional by principal component analysis.

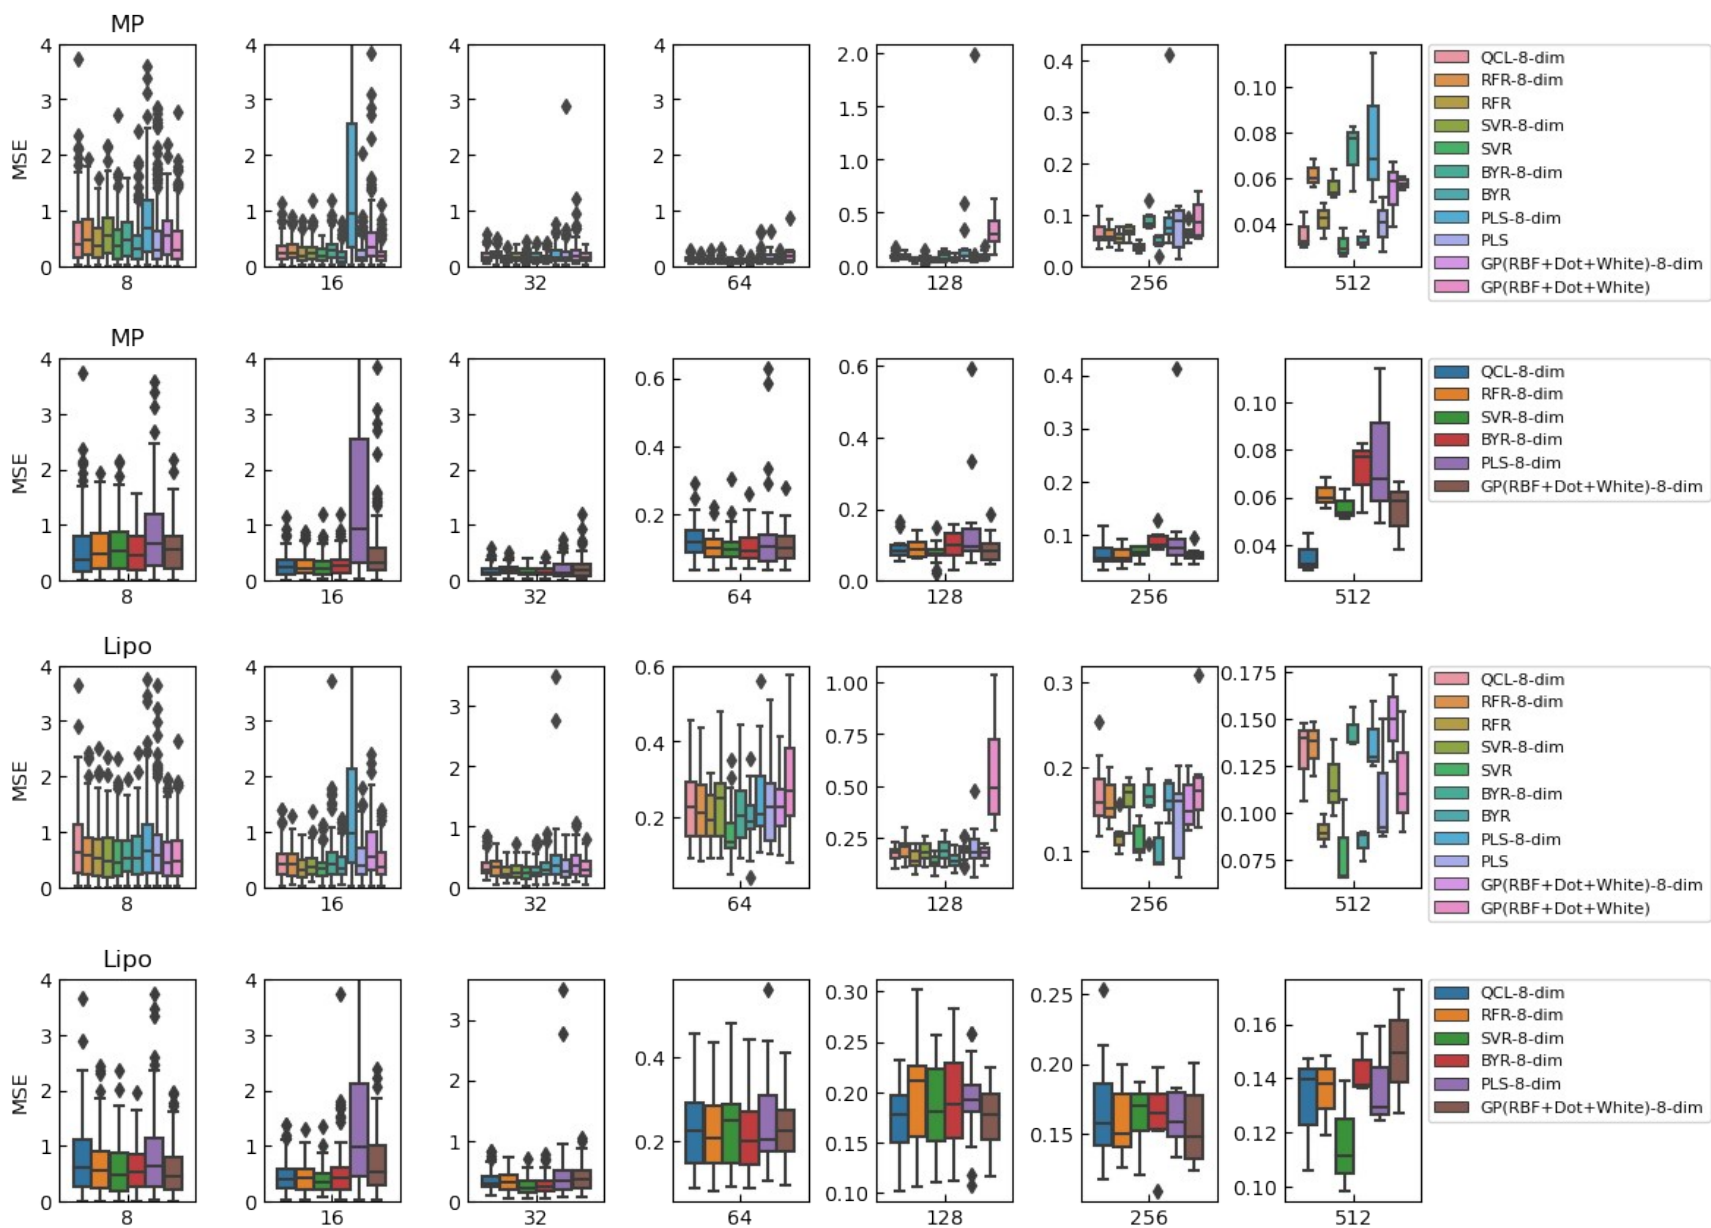

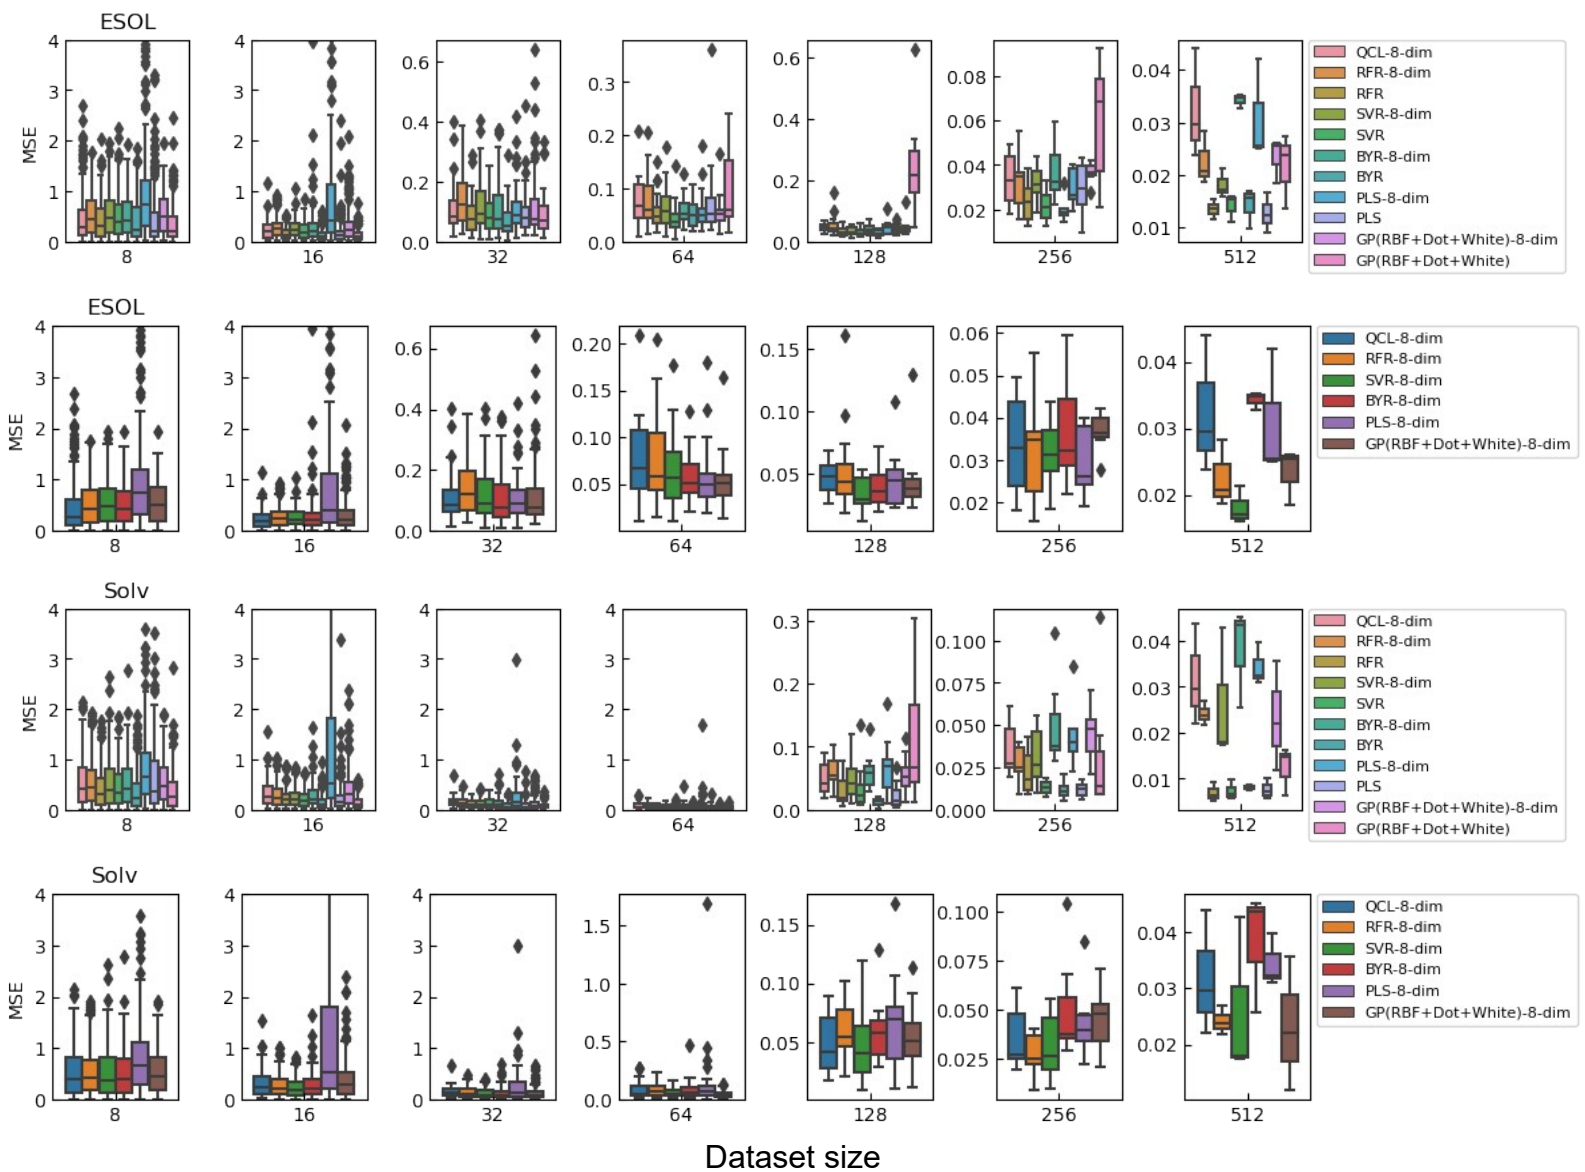

a)

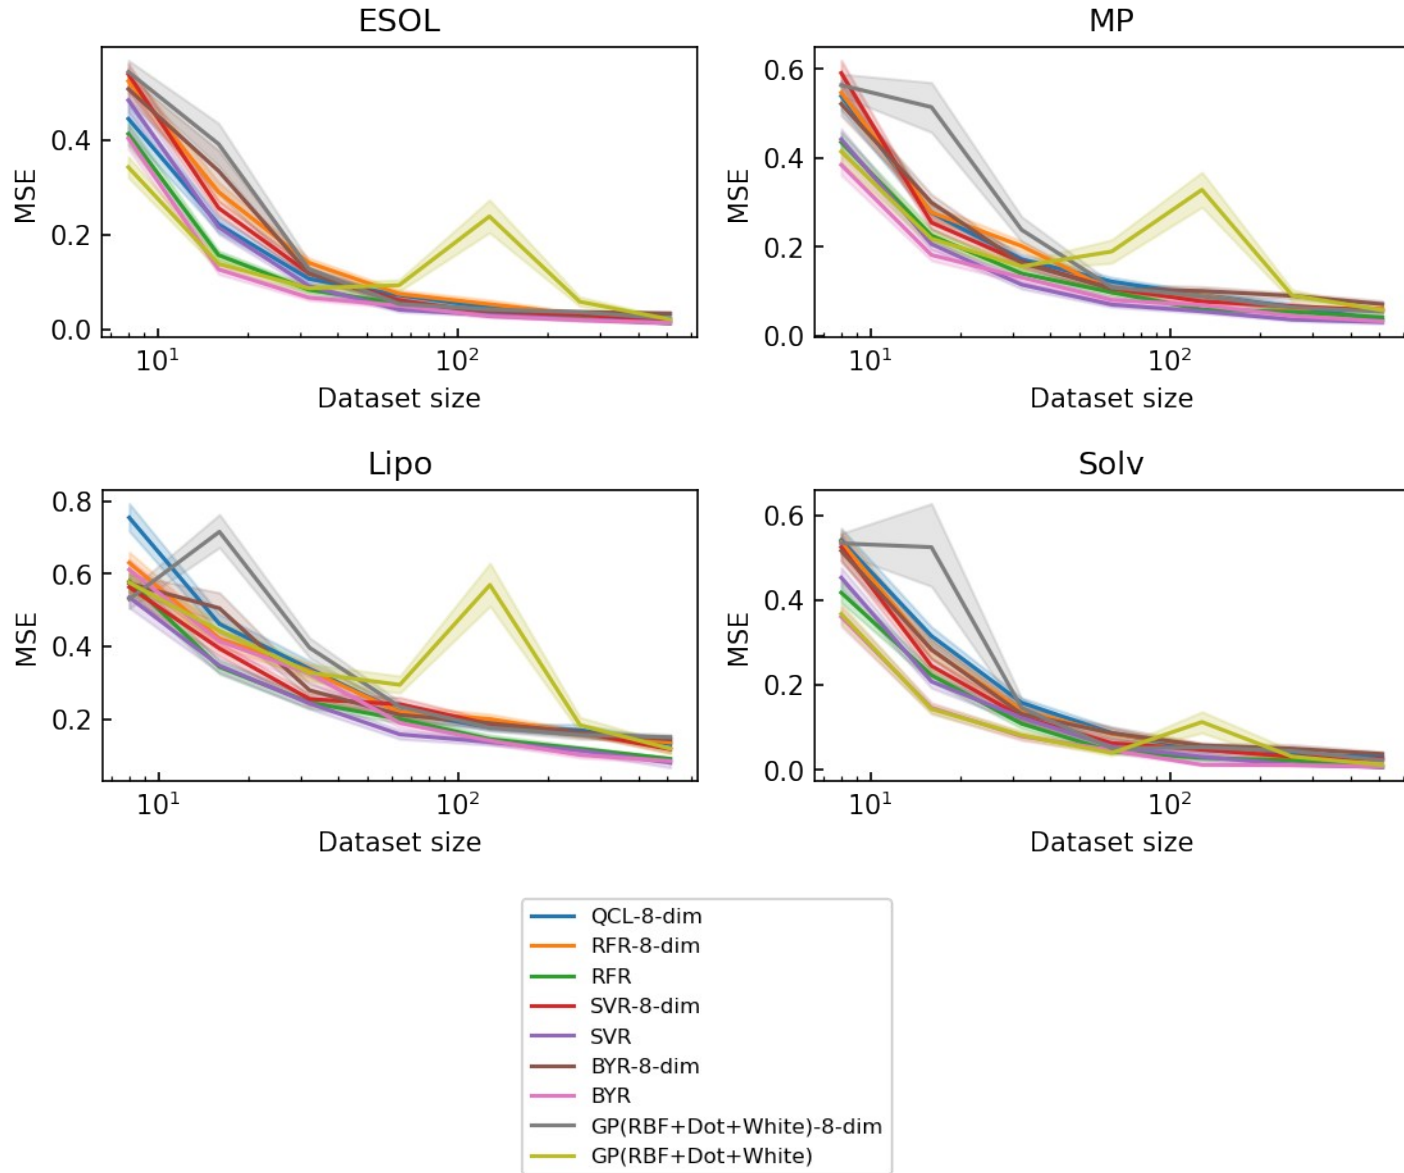

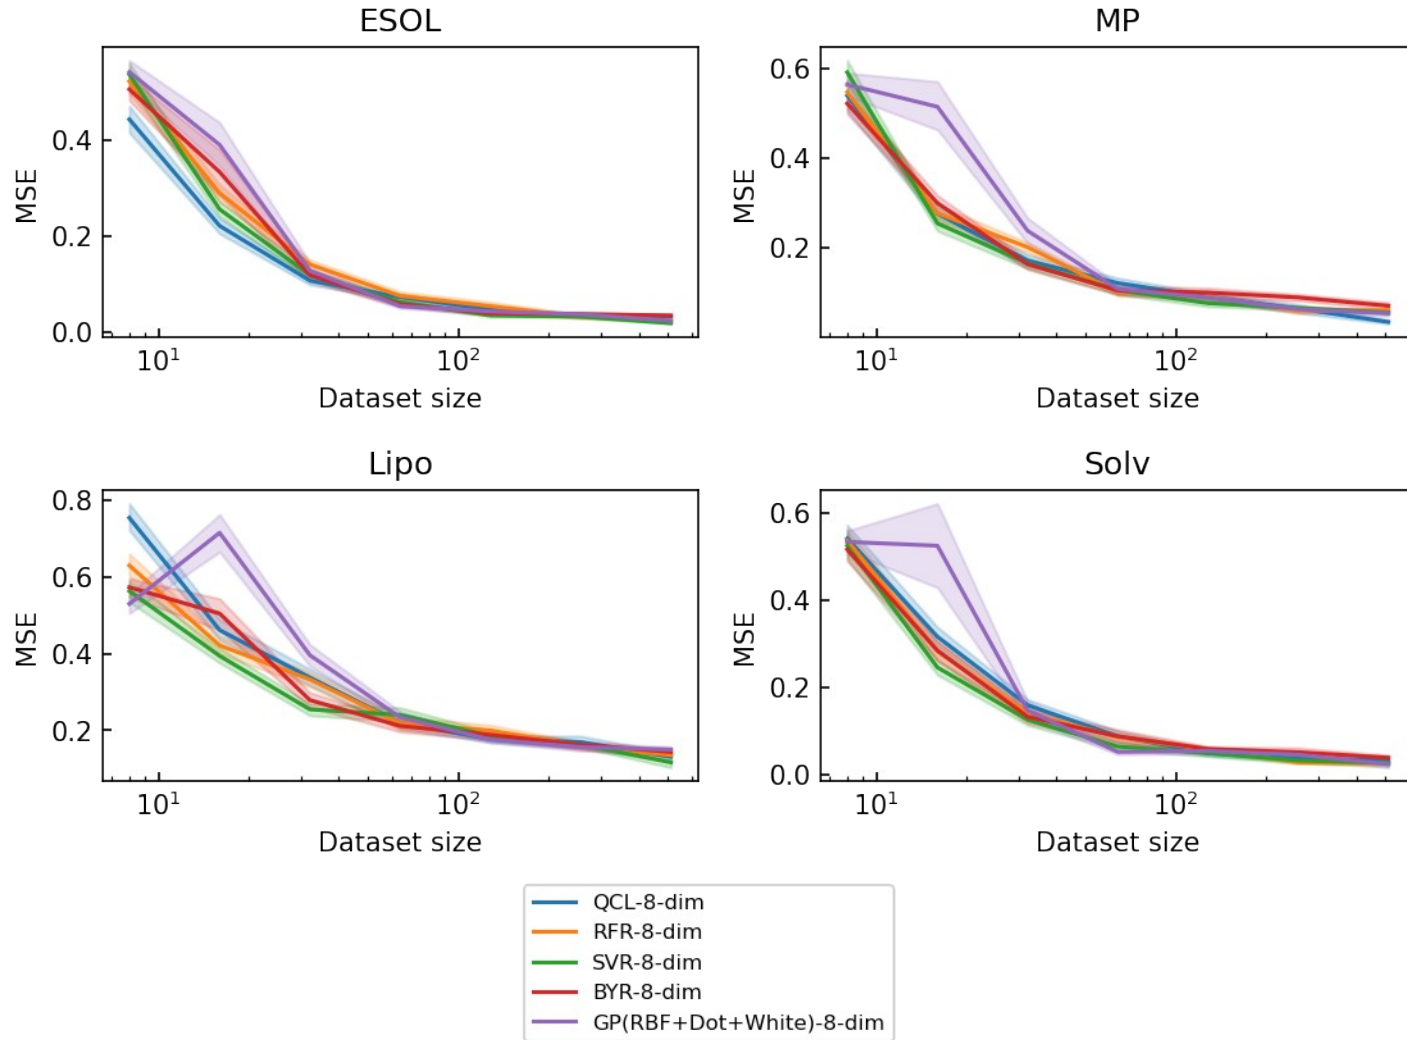

b)

Figure S 15 Regression results for the interpolating tasks as Box plots. b) Line plots with standard errors with 68% confidence intervals. In the figures, 20% of testing data were randomly sampled from the dataset, whereas the top 20% records of  $y$  were extracted in Figure S 14.



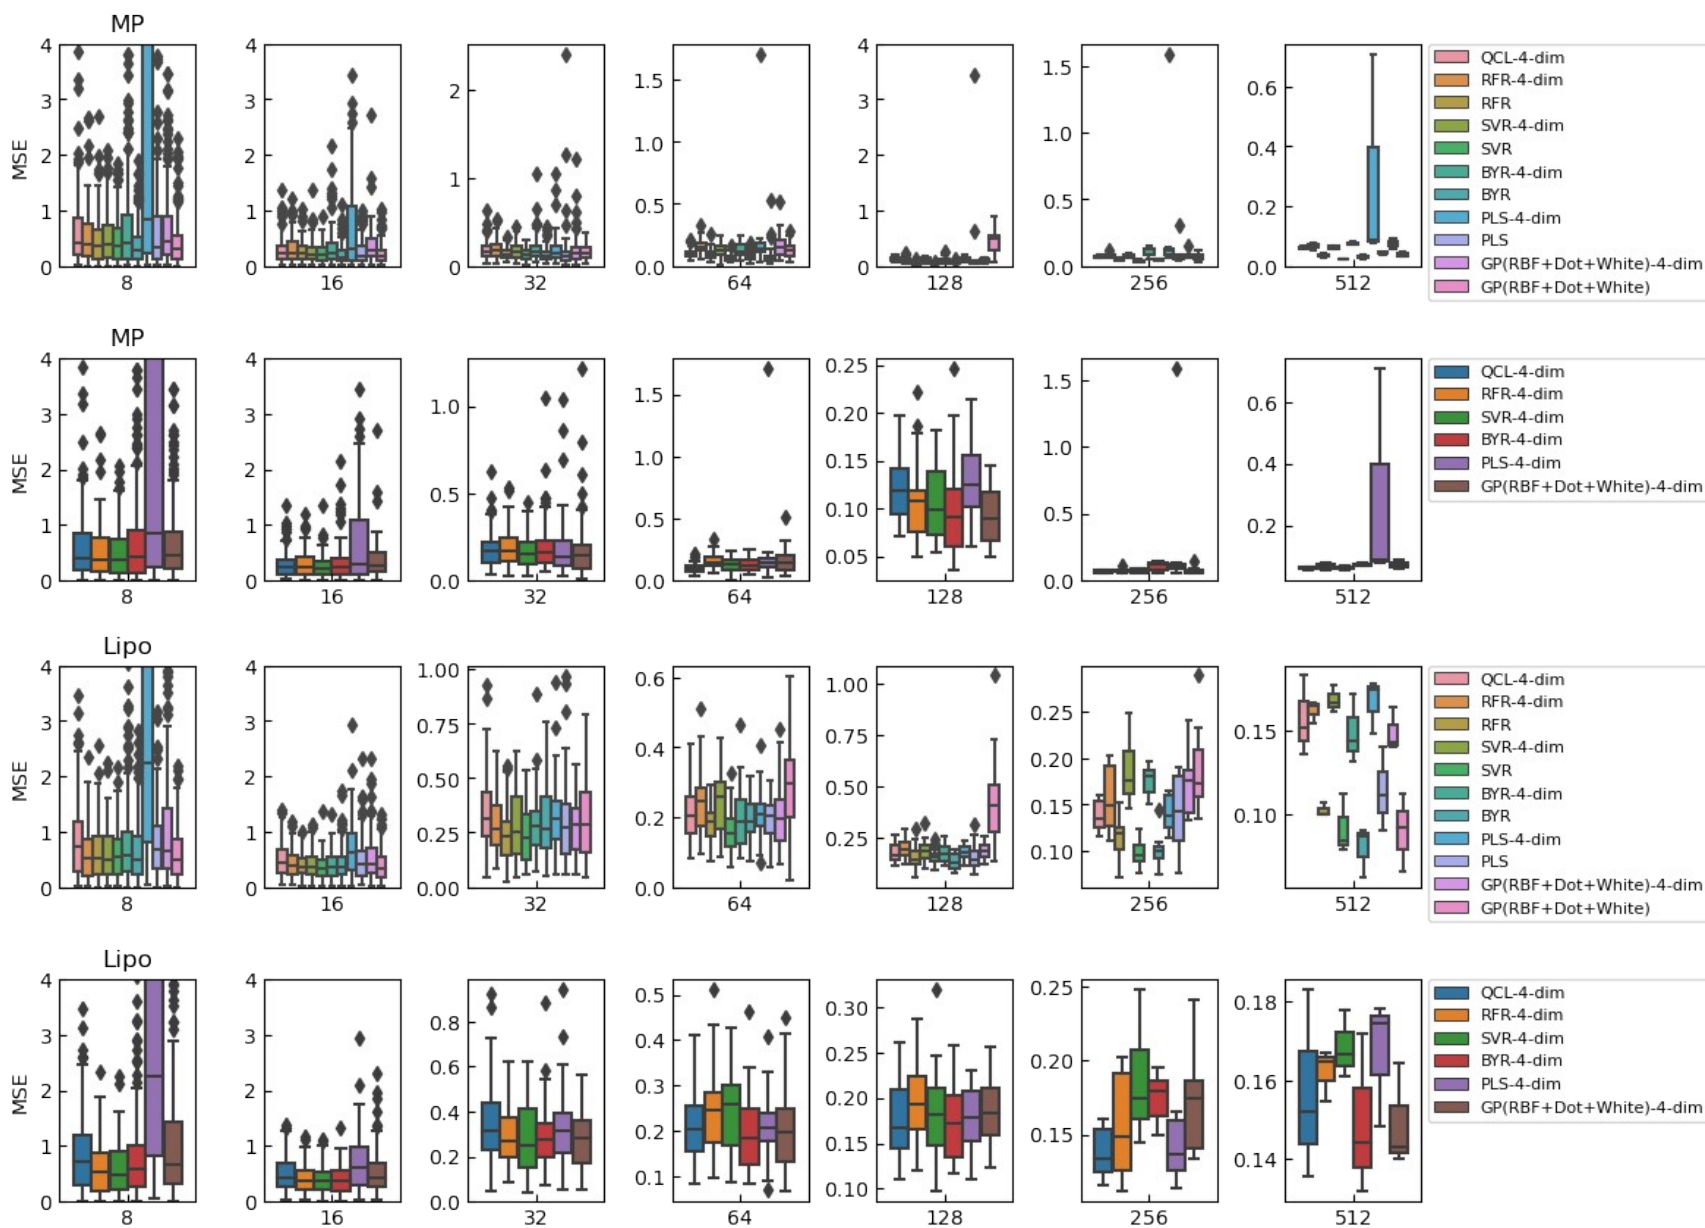

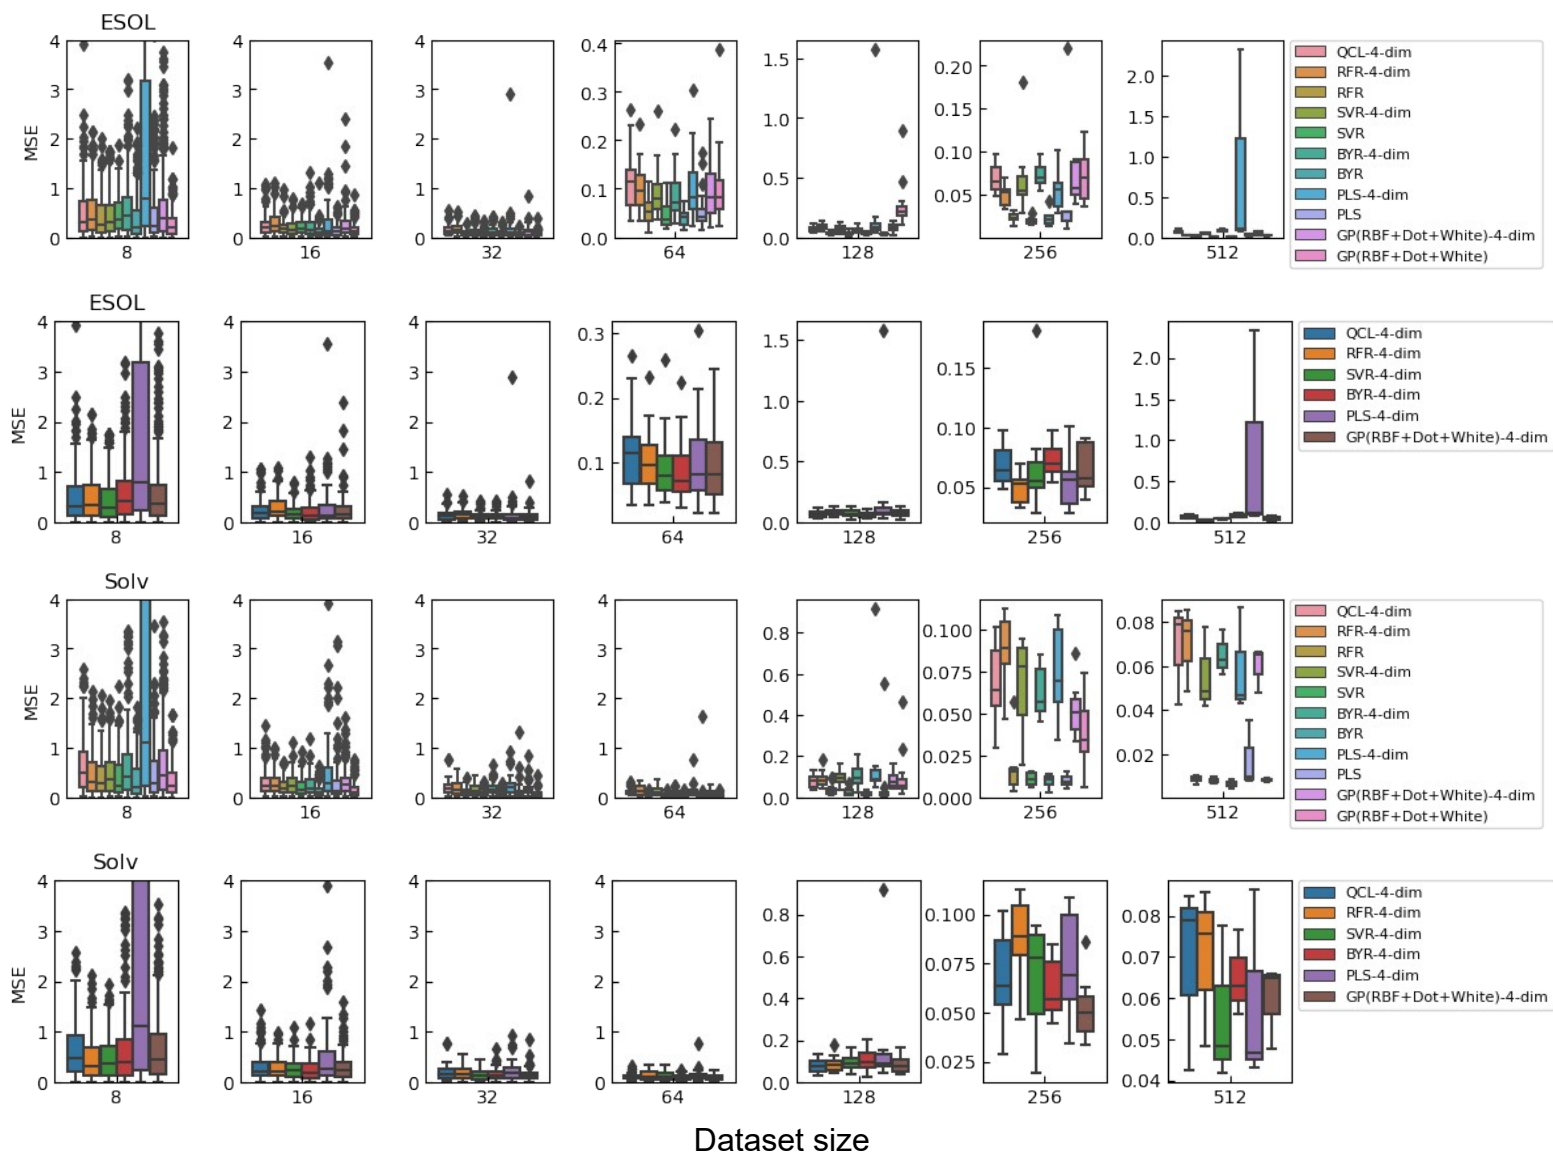

Dataset size

a)

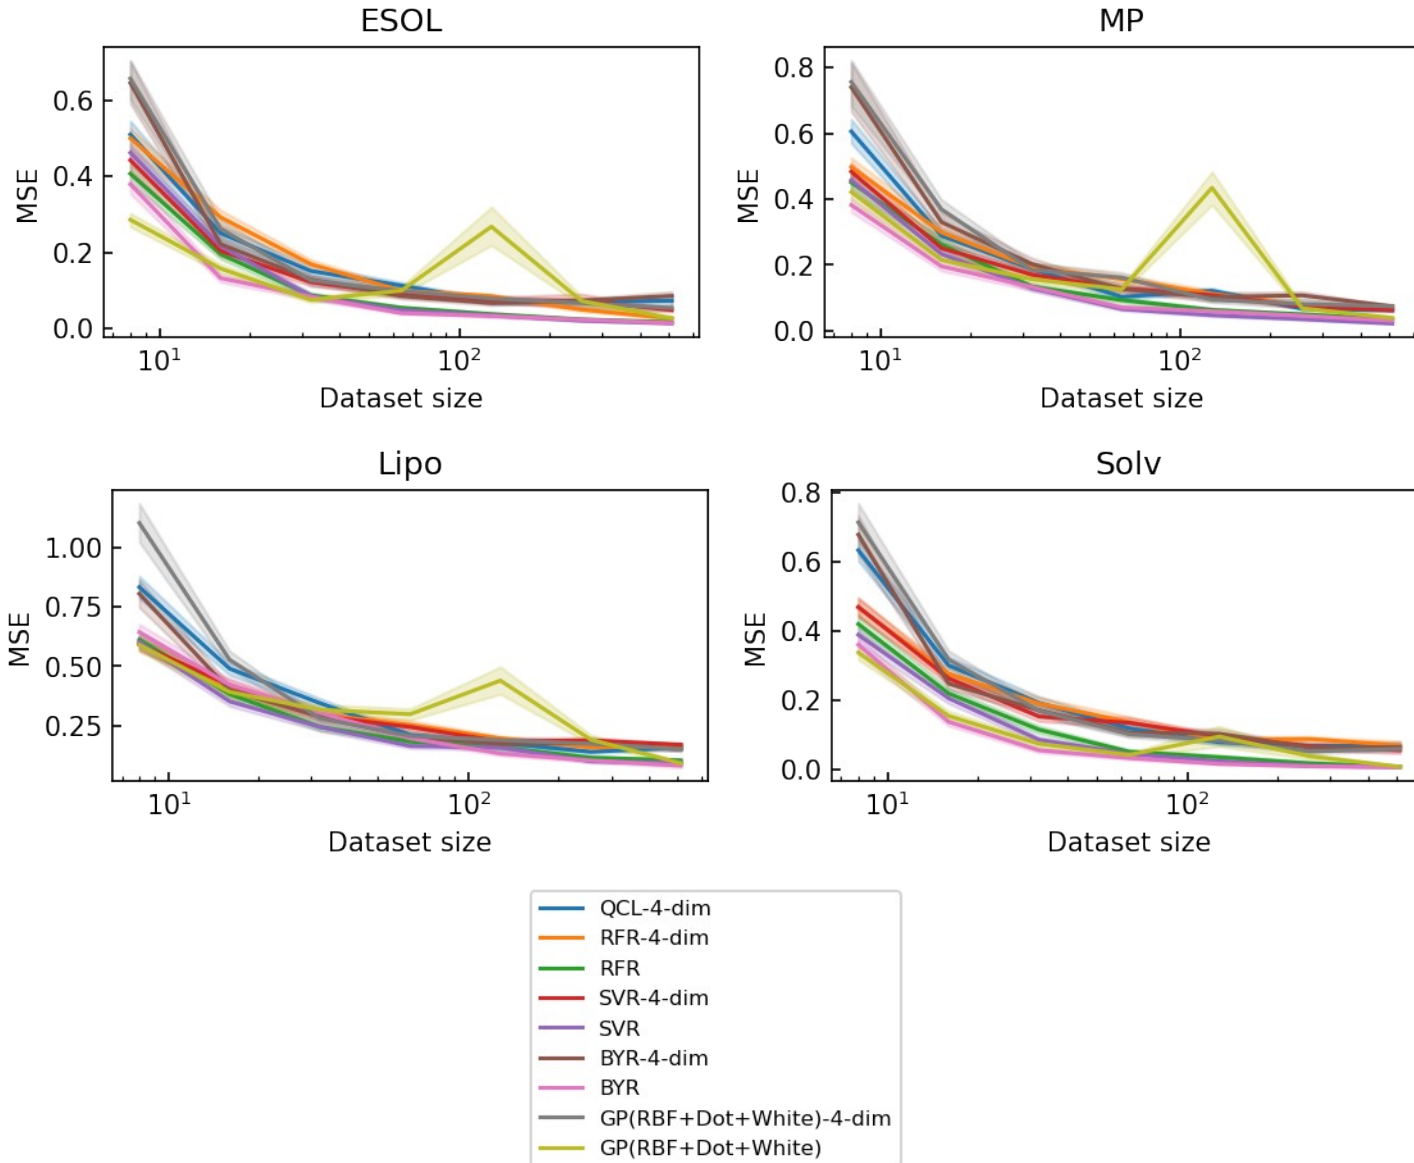

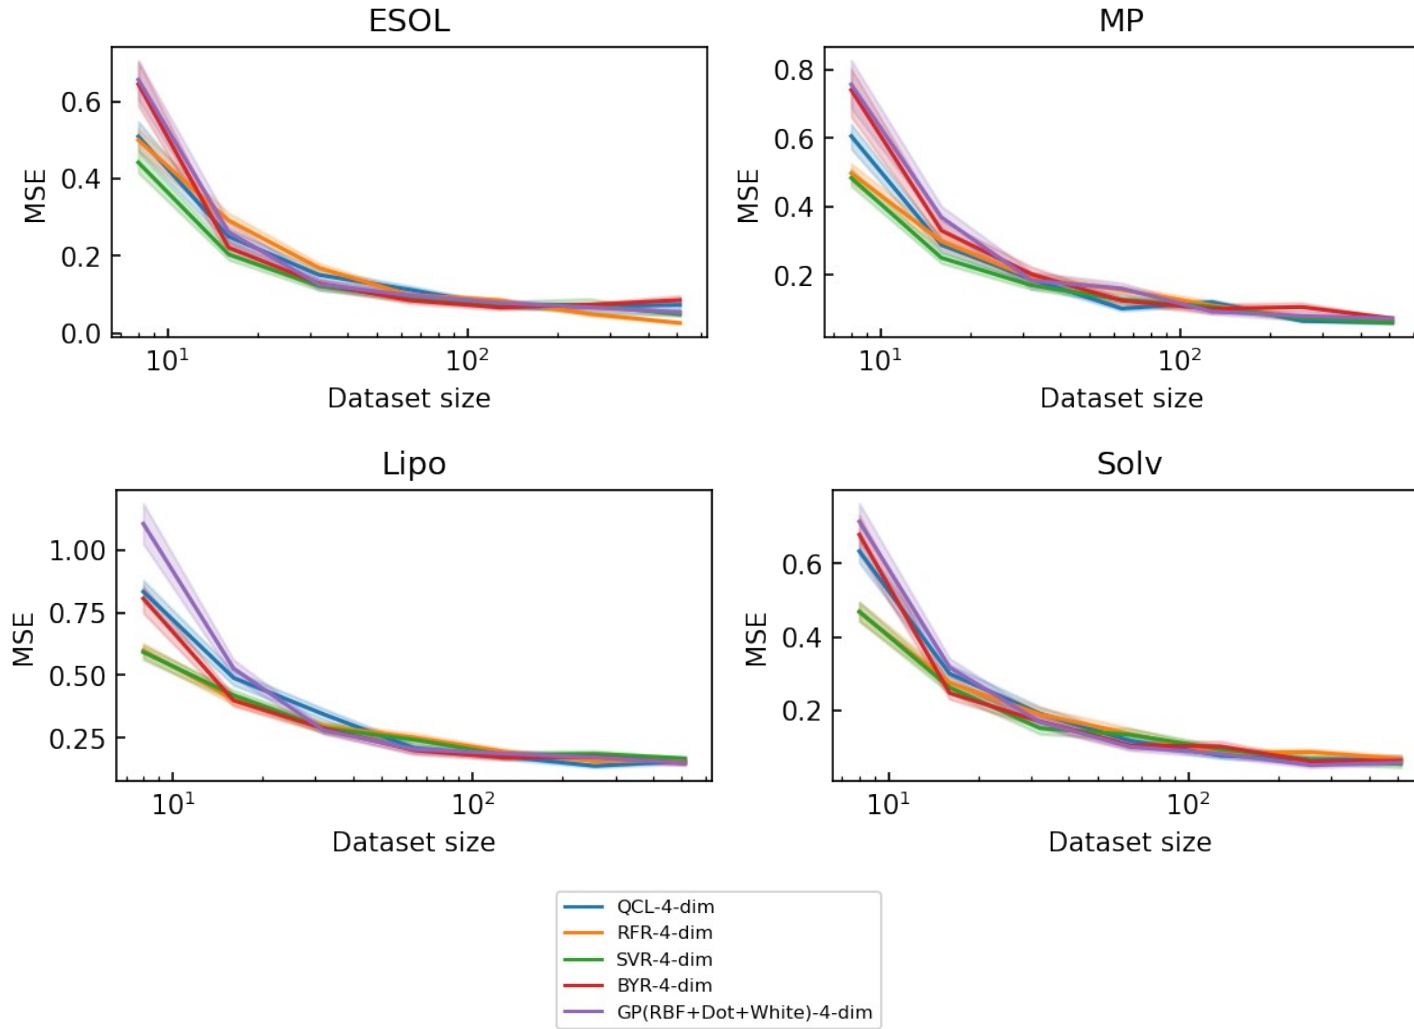

b)

Figure S 16 Regression results for the interpolating tasks with 4-dimensional vectors. a) Box plots and b) Line plots with standard errors with 68% confidence intervals.. A QCL circuit ( $n = 8$ ) inputted a vector of  $(x_1, x_1, x_2, x_2, \dots, x_4, x_4)$ .

**Table S4** List of molecular descriptors calculated by RDKit.

|                     |             | Name                     |                    |
|---------------------|-------------|--------------------------|--------------------|
| MaxEStateIndex      | PEOE_VSA2   | VSA_EState9              | fr_aryl_methyl     |
| MinEStateIndex      | PEOE_VSA3   | FractionCSP3             | fr_azide           |
| MaxAbsEStateIndex   | PEOE_VSA4   | HeavyAtomCount           | fr_azo             |
| MinAbsEStateIndex   | PEOE_VSA5   | NHOHCount                | fr_barbitur        |
| qed                 | PEOE_VSA6   | NOCCount                 | fr_benzene         |
| MolWt               | PEOE_VSA7   | NumAliphaticCarbocycles  | fr_benzodiazepine  |
| HeavyAtomMolWt      | PEOE_VSA8   | NumAliphaticHeterocycles | fr_bicyclic        |
| ExactMolWt          | PEOE_VSA9   | NumAliphaticRings        | fr_diazo           |
| NumValenceElectrons | SMR_VSA1    | NumAromaticCarbocycles   | fr_dihydropyridine |
| NumRadicalElectrons | SMR_VSA10   | NumAromaticHeterocycles  | fr_epoxide         |
| MaxPartialCharge    | SMR_VSA2    | NumAromaticRings         | fr_ester           |
| MinPartialCharge    | SMR_VSA3    | NumHAcceptors            | fr_ether           |
| MaxAbsPartialCharge | SMR_VSA4    | NumHDonors               | fr_furan           |
| MinAbsPartialCharge | SMR_VSA5    | NumHeteroatoms           | fr_guanido         |
| FpDensityMorgan1    | SMR_VSA6    | NumRotatableBonds        | fr_halogen         |
| FpDensityMorgan2    | SMR_VSA7    | NumSaturatedCarbocycles  | fr_hdrzine         |
| FpDensityMorgan3    | SMR_VSA8    | NumSaturatedHeterocycles | fr_hdrzone         |
| BCUT2D_MWHI         | SMR_VSA9    | NumSaturatedRings        | fr_imidazole       |
| BCUT2D_MWLOW        | SlogP_VSA1  | RingCount                | fr_imide           |
| BCUT2D_CHGHI        | SlogP_VSA10 | MolLogP                  | fr_isocyan         |
| BCUT2D_CHGLO        | SlogP_VSA11 | MolMR                    | fr_isothiocyan     |
| BCUT2D_LOGPHI       | SlogP_VSA12 | fr_Al_COO                | fr_ketone          |

|                |              |                    |                         |
|----------------|--------------|--------------------|-------------------------|
| BCUT2D_LOGPLOW | SlogP_VSA2   | fr_Al_OH           | fr_ketone_Topliss       |
| BCUT2D_MRHI    | SlogP_VSA3   | fr_Al_OH_noTert    | fr_lactam               |
| BCUT2D_MRLow   | SlogP_VSA4   | fr_ArN             | fr_lactone              |
| BalabanJ       | SlogP_VSA5   | fr_Ar_COO          | fr_methoxy              |
| BertzCT        | SlogP_VSA6   | fr_Ar_N            | fr_morpholine           |
| Chi0           | SlogP_VSA7   | fr_Ar_NH           | fr_nitrile              |
| Chi0n          | SlogP_VSA8   | fr_Ar_OH           | fr_nitro                |
| Chi0v          | SlogP_VSA9   | fr_COO             | fr_nitro_ arom          |
| Chi1           | TPSA         | fr_COO2            | fr_nitro_ arom_nonortho |
| Chi1n          | EState_VSA1  | fr_C_O             | fr_nitroso              |
| Chi1v          | EState_VSA10 | fr_C_O_noCOO       | fr_oxazole              |
| Chi2n          | EState_VSA11 | fr_C_S             | fr_oxime                |
| Chi2v          | EState_VSA2  | fr_HOCCN           | fr_para_hydroxylation   |
| Chi3n          | EState_VSA3  | fr_Imine           | fr_phenol               |
| Chi3v          | EState_VSA4  | fr_NH0             | fr_phenol_noOrthoHbond  |
| Chi4n          | EState_VSA5  | fr_NH1             | fr_phos_acid            |
| Chi4v          | EState_VSA6  | fr_NH2             | fr_phos_ester           |
| HallKierAlpha  | EState_VSA7  | fr_N_O             | fr_piperdine            |
| Ipc            | EState_VSA8  | fr_Ndealkylation1  | fr_piperzine            |
| Kappa1         | EState_VSA9  | fr_Ndealkylation2  | fr_priamide             |
| Kappa2         | VSA_EState1  | fr_Nhpyrrole       | fr_prisulfonamd         |
| Kappa3         | VSA_EState10 | fr_SH              | fr_pyridine             |
| LabuteASA      | VSA_EState2  | fr_aldehyde        | fr_quatN                |
| PEOE_VSA1      | VSA_EState3  | fr_alkyl_carbamate | fr_sulfide              |

|            |             |                 |                   |
|------------|-------------|-----------------|-------------------|
| PEOE_VSA10 | VSA_EState4 | fr_alkyl_halide | fr_sulfonamd      |
| PEOE_VSA11 | VSA_EState5 | fr_allylic_oxid | fr_sulfone        |
| PEOE_VSA12 | VSA_EState6 | fr_amide        | fr_term_acetylene |
| PEOE_VSA13 | VSA_EState7 | fr_amidine      | fr_tetrazole      |
| PEOE_VSA14 | VSA_EState8 | fr_aniline      | fr_thiazole       |
|            |             |                 | fr_thiocyan       |
|            |             |                 | fr_thiophene      |
|            |             |                 | fr_unbrch_alkane  |
|            |             |                 | fr_urea           |
